# Supplementary material for: Photo-induced synthesis of fluoroalkylated quinolinones via an iron-catalyzed LMCT decarboxylation process
Source: Royal Society of Chemistry journal article supplement (doi:10.1039/d4qo00707g), 2024-01-01

## Supporting Information

### Photo-induced Synthesis of Fluoroalkylated Quinolinone during Iron-Catalyzed LMCT Decarboxylation Process

Zhuoheng Song,<sup>a</sup> Lin Guo,<sup>a</sup> Chao Yang,<sup>a,\*</sup> and Wujiong Xia<sup>a,b,\*</sup>

<sup>a</sup> State Key Lab of Urban Water Resource and Environment, School of Science, Harbin Institute of Technology (Shenzhen), Shenzhen 518055, People's Republic of China

E-mail: xyyang@hit.edu.cn; xiawj@hit.edu.cn

<sup>b</sup> School of Chemistry and Chemical Engineering, Henan Normal University, Xinxiang, Henan 453007, People's Republic of China

#### Table Content

|                                                                                             |     |
|---------------------------------------------------------------------------------------------|-----|
| 1. General Information                                                                      | S2  |
| 2. General Synthetic Procedure                                                              | S3  |
| 3. Optimization of Reaction Conditions                                                      | S6  |
| 4. Reaction of Other Radical Acceptors                                                      | S9  |
| 5. Substrate Characterization                                                               | S11 |
| 6. Product Characterization                                                                 | S14 |
| 7. References                                                                               | S20 |
| 8. Copies of <sup>1</sup> H, <sup>13</sup> C and <sup>19</sup> F NMR Spectra for Substrates | S21 |
| 9. Copies of <sup>1</sup> H, <sup>13</sup> C and <sup>19</sup> F NMR Spectra for Products   | S33 |

## 1 General Information

Unless otherwise mentioned, all reagents were purchased from commercial sources and used as received. The visible-light mediated reactions were performed on WPTEC-1020L instruments which are purchased from WATTCAS, China. All yields of products refer to the isolated yields after chromatography.  $^1\text{H}$  NMR (400 MHz),  $^{13}\text{C}$  NMR (101 MHz) and  $^{19}\text{F}$  NMR (376 MHz) spectra were recorded on a Bruker AV-400 spectrometer or a Quantum-I Plus 400 in  $\text{CDCl}_3$ . For  $^1\text{H}$  NMR,  $\text{CDCl}_3$  ( $\delta = 7.26$  ppm) or tetramethylsilane (TMS,  $\delta = 0$  ppm) serves as the internal standard; for  $^{13}\text{C}$  NMR,  $\text{CDCl}_3$  ( $\delta = 77.16$  ppm) serves as the internal standard. Data are reported as follows: chemical shift (in ppm), multiplicity (s = singlet, d = doublet, t = triplet, q = quartet, p = quintet, hept = heptet, m = multiplet, br = broad), coupling constant (in Hz), and integration. GC analysis was performed on a 7890B/Agilent, while GC-MS analysis was performed on a 7890A-5975C/Agilent. HRMS spectra were recorded on a Waters Xevo G2QTOF/UPLC mass spectrometer using electrospray ionization. NMR yields of the screening part were calculated using 1,3,5-trimethoxybenzene as the internal standard. All yields of products refer to the isolated yields after chromatography.

## 2 General Synthetic Procedure

### 2.1 General procedure for synthesis of N-(2-cyanophenyl)-N-acrylamide

N-(2-cyanophenyl)-N-acrylamides were prepared on gram-scale in 1 or 2 steps according to the procedure disclosed by Feng et al. from inexpensive commercial reagent 2-aminobenzonitriles.<sup>[1]</sup> We here took synthetic pathway of **1a** for example.

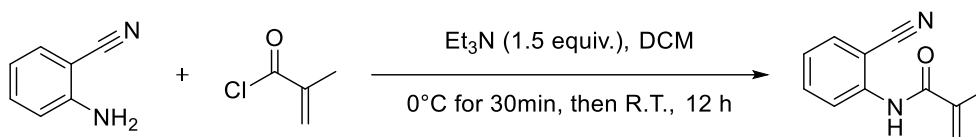

**Scheme S1.** Synthesis of N-(2-cyanophenyl)methacrylamide

To a 100 mL round bottom flask equipped with a magnetic stirring bar were added with 2-aminobenzonitrile (1.18g, 10 mmol, 1.0 equiv.), dry triethylamine (1.52g, 15 mmol, 1.5 equiv.), DCM (40 mL), then cooled to 0 °C in the ice water bath. Methacryloyl chloride (1.14 g, 11 mmol, 1.1 equiv.) was slowly added to the solution at 0 °C and then the mixture was stirred at room temperature for 12 h. The solution was concentrated under reduced pressure, and the mixture was purified by flash column chromatography over silica gel (1:20 to 1:5 EtOAc:PE) to afford the N-(2-cyanophenyl)methacrylamide (1.67 g, 9 mmol, 90% yield) as a white solid.

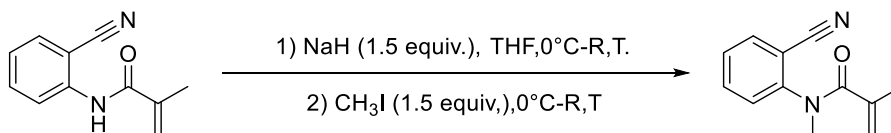

**Scheme S2.** Synthesis of N-(2-cyanophenyl)-N-methylmethacrylamide

To a solution of N-(2-cyanophenyl)methacrylamide (1.67 g, 9 mmol) in THF (30.0 mL) was added a magnetic stirring bar and 60% NaH (540 mg, 13.5 mmol, 1.5 equiv.) at 0 °C and stirred for 30 min. Then methyl iodide (1.92 g, 13.5 mmol, 1.5 equiv.) was added and the reaction was warmed to room temperature. After stirring for 8 h, the reaction was quenched by water and the aqueous layer was extracted with EtOAc (10 mL x 3). The combined organic layers were washed with brine, dried over Na<sub>2</sub>SO<sub>4</sub> and concentrated in vacuo. The residue was purified by flash column chromatography over silica gel (1:10 to 1:3 EtOAc:PE) to afford **1a** N-(2-cyanophenyl)-N-methylmethacrylamide (1.40 g, 7 mmol, 78% yield) as a yellow solid. Most substrates followed the reaction pathway of **1a**.

## 2.2 General procedure for preparation of fluoroalkylated quinoline-2,4-dione

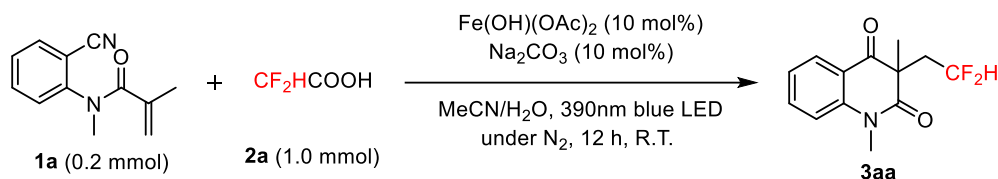

**Scheme S3.** Procedure for preparation of 3-(2,2-difluoroethyl)-1,3-dimethylquinoline-2,4(1H,3H)-dione

To an oven-dried 10 mL quartz reaction tube equipped with a magnetic stir bar were sequentially added the corresponding N-(2-cyanophenyl)-N-acrylamide **1a** (40mg, 0.2 mmol, 1.0 equiv.),  $\text{Fe}(\text{OH})(\text{OAc})_2$  (3.8 mg, 10 mol%),  $\text{Na}_2\text{CO}_3$  (2.2 mg, 10 mol%). The tube was degassed three times and was added the solvent  $\text{MeCN}/\text{H}_2\text{O}$  (2.0mL), then the reactant difluoroacetic acid **2a** (96mg, 1.0 mmol, 5.0 equiv.). The tube was then put into the reactor and was irradiated under 10 W 390 nm blue LED chip irradiation and stirred for 12 h at room temperature. After the reaction was complete, all reactants were filtered through a short silica gel column, washed with EtOAc, and the crude product was concentrated under reduced pressure, then purified by column chromatography (1:10 to 1:3 EtOAc : petroleum ether). Combined organic layers were washed with brine twice, dried with  $\text{Na}_2\text{SO}_4$ , concentrated and purified by column chromatography.

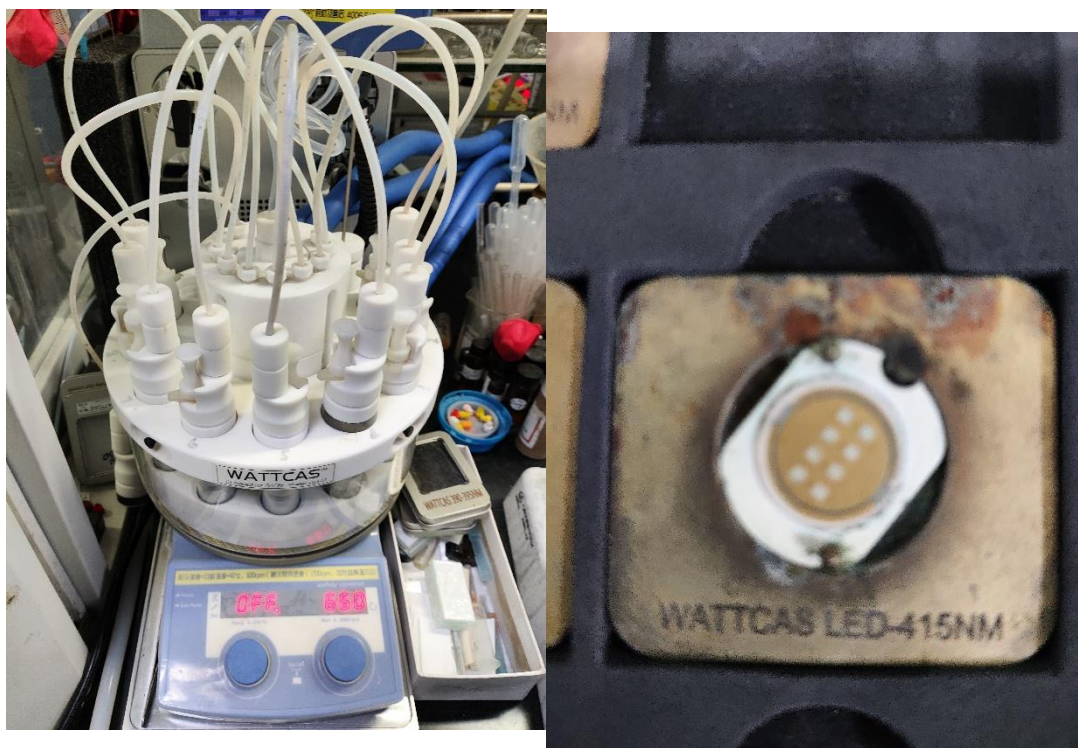

**Figure S1.** Photo reactor device and 390nm 10W blue LED chip

## 2.3 General procedure for gram-scale flow reaction

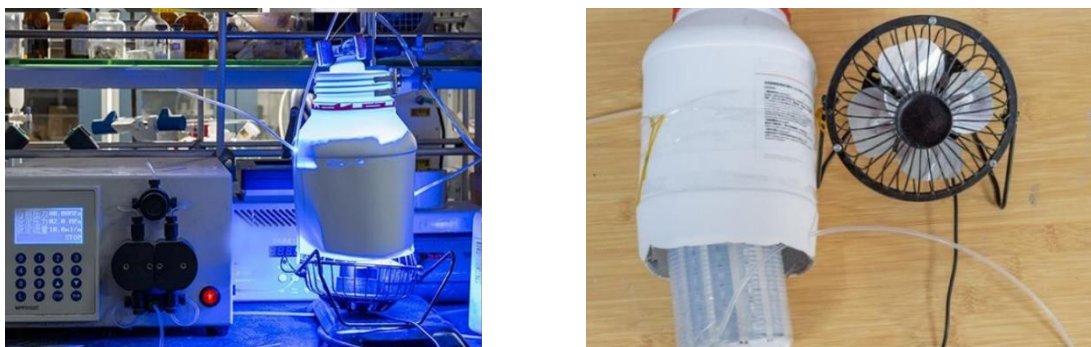

**Figure S2.** Example figure of gram scale flow reactor of photoreactions

The construction of the photoreaction device followed Qi, et al<sup>[2]</sup>. An oven dried 200 mL round bottom flask was charged with a stir bar. Substrate **1a** (1.0 g, 5 mmol, 1.0 equiv.), **2a** (2.4 g, 25 mmol, 5.0 equiv.), Fe(OH)(OAc)<sub>2</sub> (76mg, 10 mol%) and Na<sub>2</sub>CO<sub>3</sub> (55mg, 10 mol%) was added with 40 mL MeCN and 10 mL water. The reaction mixture was pumped into PTFE transparent coil and irradiated with commercially available 390 nm blue light bulbs and flow pump for 12 hours. After the reaction was complete, all reactants were filtered through a short silica gel column, washed with EtOAc, and the crude product was concentrated under reduced pressure, then purified by column chromatography (1:10 to 1:3 EtOAc : petroleum ether). Affording product  $\gamma$ -lactam **3aa** (0.834g, 66% yield) as a yellow oil.

## 2.4 Typical unsuccessful reaction samples

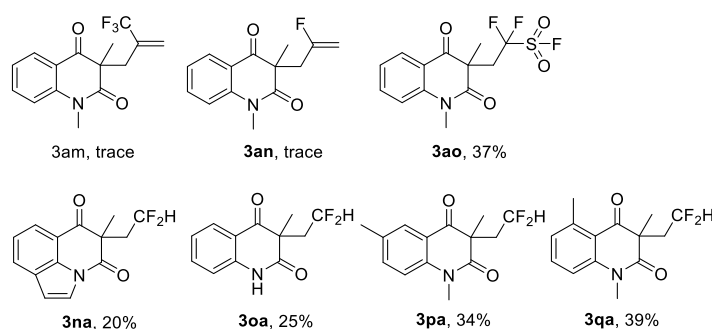

**Scheme S4.** Typical unsuccessful reaction samples

### 3 Optimization of Reaction Conditions

**Table 1S.** Optimization of solvent.<sup>[a]</sup>

| Entry    | Solvent               | Yield (%) |
|----------|-----------------------|-----------|
| 1        | dry MeCN              | N.R.      |
| 2        | MeCN                  | 28        |
| 3        | MeCN:Water=2:1        | 45        |
| 4        | THF:Water=2:1         | trace     |
| 5        | DMSO:Water=2:1        | 25        |
| <b>6</b> | <b>MeCN:Water=4:1</b> | <b>50</b> |
| 7        | MeCN:Water=9:1        | 36        |
| 8        | DMSO                  | trace     |
| 9        | DMSO:MeCN=1:1         | trace     |

<sup>a)</sup> Reaction conditions: substrate **1a** (0.2mmol), difluoroacetic acid (**2a**) (10 equiv.), Fe(acac)<sub>3</sub> (10 mol%), DBU (0.5 equiv.), 10 W 390 nm LEDs at room temperature for 12 hours under N<sub>2</sub> atmosphere.

**Table 2S.** Optimization of Oxidant.<sup>[a]</sup>

| Entry    | Possible Oxidant                                              | Atmosphere           | Yield (%) |
|----------|---------------------------------------------------------------|----------------------|-----------|
| <b>1</b> | <b>None</b>                                                   | <b>N<sub>2</sub></b> | <b>50</b> |
| 2        | Open to air                                                   | Air                  | 40        |
| 3        | Na <sub>2</sub> S <sub>2</sub> O <sub>8</sub>                 | N <sub>2</sub>       | <30       |
| 4        | K <sub>2</sub> S <sub>2</sub> O <sub>8</sub>                  | N <sub>2</sub>       | <30       |
| 5        | (NH <sub>4</sub> ) <sub>2</sub> S <sub>2</sub> O <sub>8</sub> | N <sub>2</sub>       | <30       |

<sup>a)</sup> Reaction conditions: substrate **1a** (0.2mmol), difluoroacetic acid (**2a**) (10 equiv.), Fe(acac)<sub>3</sub> (10 mol%), DBU (0.5 equiv.), MeCN:Water=4:1 (2mL, 0.1M), 10 W 390 nm LEDs at room temperature for 12 hours.

**Table 3S.** Optimization of photo catalyst.<sup>[a]</sup>

| Entry    | Photocatalyst                                      | Yield (%) |
|----------|----------------------------------------------------|-----------|
| 1        | Fe(acac) <sub>3</sub>                              | 50        |
| <b>2</b> | <b>Fe(OH)(OAc)<sub>2</sub></b>                     | <b>72</b> |
| 3        | Fe(OH) (OAc) <sub>2</sub> +LiCl                    | 70        |
| 4        | FeCl <sub>3</sub>                                  | 63        |
| 5        | Fe(NO <sub>3</sub> ) <sub>3</sub>                  | 56        |
| 6        | FeCl <sub>2</sub>                                  | 41        |
| 7        | FeBr <sub>3</sub>                                  | 36        |
| 8        | Mes-Acr <sup>+</sup> ClO <sub>4</sub> <sup>-</sup> | n.d.      |

<sup>a)</sup> Reaction conditions: substrate **1a** (0.2mmol), difluoroacetic acid (**2a**) (10 equiv.), DBU (0.5 equiv.), MeCN:Water=4:1 (2mL, 0.1M), 10 W 390 nm LEDs at room temperature for 12 hours under N<sub>2</sub> atmosphere.

**Table 4S.** Optimization of reactant dosage.<sup>[a]</sup>

| Entry    | Acid (equiv.) | Yield (%) |
|----------|---------------|-----------|
| 1        | 3             | 54        |
| <b>2</b> | <b>5</b>      | <b>72</b> |
| 3        | 10            | 72        |

<sup>a)</sup> Reaction conditions: substrate **1a** (0.2mmol), difluoroacetic acid (**2a**) (5 equiv.), Fe(OH)(OAc)<sub>2</sub> (10 mol%), DBU (0.5 equiv.), MeCN:Water=4:1 (2mL, 0.1M), 10 W 390 nm LEDs at room temperature for 12 hours under N<sub>2</sub> atmosphere.

**Table 5S.** Optimization of base.<sup>[a]</sup>

| Entry    | Base                                | Yield (%) |
|----------|-------------------------------------|-----------|
| 1        | None                                | N.R.      |
| 2        | DBU                                 | 72        |
| 3        | DABCO                               | 48        |
| 4        | Quinuclidine                        | 34        |
| 5        | Et <sub>3</sub> N                   | trace     |
| 6        | LDA                                 | trace     |
| <b>7</b> | <b>Na<sub>2</sub>CO<sub>3</sub></b> | <b>87</b> |
| 8        | Cs <sub>2</sub> CO <sub>3</sub>     | 80        |
| 9        | K <sub>2</sub> HPO <sub>4</sub>     | 45        |

<sup>a)</sup> Reaction conditions: substrate **1a** (0.2mmol), difluoroacetic acid (**2a**) (5 equiv.), Fe(OH)(OAc)<sub>2</sub> (10 mol%), MeCN:Water=4:1 (2mL, 0.1M), 10 W 390 nm LEDs at room temperature for 12 hours under N<sub>2</sub> atmosphere.

**Table 7S.** Optimization of base dosage.<sup>[a]</sup>

| Entry    | Na <sub>2</sub> CO <sub>3</sub> (equiv.) | Yield (%) |
|----------|------------------------------------------|-----------|
| <b>1</b> | <b>0.1</b>                               | <b>87</b> |
| 2        | 0.2                                      | 86        |
| 3        | 0.5                                      | 87        |

<sup>a)</sup> Reaction conditions: substrate **1a** (0.2mmol), difluoroacetic acid (**2a**) (5 equiv.), Fe(OH)(OAc)<sub>2</sub> (10 mol%), MeCN:Water=4:1 (2mL, 0.1M), 10 W 390 nm LEDs at room temperature for 12 hours under N<sub>2</sub> atmosphere.

**Table 6S.** Optimization of light resource.<sup>[a]</sup>

| Entry    | Light Source | Yield (%) |
|----------|--------------|-----------|
| 1        | 380nm        | 71        |
| <b>2</b> | <b>390nm</b> | <b>87</b> |
| 3        | 400nm        | 64        |
| 4        | 405nm        | 56        |
| 5        | 410nm        | 58        |
| 6        | 460nm        | n.d.      |

<sup>a)</sup> Reaction conditions: substrate **1a** (0.2mmol), difluoroacetic acid (**2a**) (5 equiv.), Fe(OH)(OAc)<sub>2</sub> (10 mol%), Na<sub>2</sub>CO<sub>3</sub> (10 mol%), MeCN:Water=4:1 (2mL, 0.1M), 10 W 390 nm LEDs at room temperature for 12 hours under N<sub>2</sub> atmosphere.

**Table 7S.** Optimization of react time and additives.<sup>[a]</sup>

| Entry | Other changes         | Yield (%) |
|-------|-----------------------|-----------|
| 1     | 8h react time         | 66        |
| 2     | 12h react time        | 87        |
| 3     | 16h react time        | 80        |
| 4     | 20h react time        | 59        |
| 5     | 24h react time        | 33        |
| 6     | Add 5% HCl            | 70        |
| 7     | 60°C temp             | 60        |
| 8     | 5W radiation strength | 54        |

<sup>a)</sup> Standard reaction conditions: substrate **1a** (0.2mmol), difluoroacetic acid (**2a**) (5 equiv.), Fe(OH)(OAc)<sub>2</sub> (10 mol%), Na<sub>2</sub>CO<sub>3</sub> (10 mol%), MeCN:Water=4:1 (2mL, 0.1M), 10 W 390 nm LEDs at room temperature for 12 hours under N<sub>2</sub> atmosphere. Each entry only changed the conditions represented.

**Table 8S.** Verifying of optimized conditions.<sup>[a]</sup>

| Entry | Variation from standard conditions <sup>[a]</sup> | Yield (%)         |
|-------|---------------------------------------------------|-------------------|
| 1     | None                                              | 87                |
| 2     | FeCl <sub>3</sub> as photo catalyst               | 68                |
| 3     | FeCl <sub>2</sub> as photo catalyst               | 52                |
| 4     | Fe(acac) <sub>3</sub> as photo catalyst           | 70                |
| 5     | 380 nm LED                                        | 71                |
| 6     | 405 nm LED                                        | 56                |
| 7     | DMSO/H <sub>2</sub> O as solvent                  | 40                |
| 8     | Dry MeCN                                          | trace             |
| 9     | DBU as base                                       | 35                |
| 10    | Cs <sub>2</sub> CO <sub>3</sub> as base           | 80                |
| 11    | 3 equiv. <b>2a</b>                                | 54 <sup>[d]</sup> |
| 12    | 10 equiv. <b>2a</b>                               | 86                |
| 13    | Open to air                                       | 63                |
| 14    | No Photo Catalyst                                 | N.R.              |
| 15    | React in dark                                     | N.R.              |

<sup>a)</sup> Standard reaction conditions: substrate **1a** (0.2mmol), difluoroacetic acid (**2a**) (5 equiv.), Fe(OH)(OAc)<sub>2</sub> (10 mol%), Na<sub>2</sub>CO<sub>3</sub> (10 mol%), MeCN:Water=4:1 (2mL, 0.1M), 10 W 390 nm LEDs at room temperature for 12 hours under N<sub>2</sub> atmosphere. Each entry only changed the conditions represented.

## 4 Reaction of Other Radical Acceptors

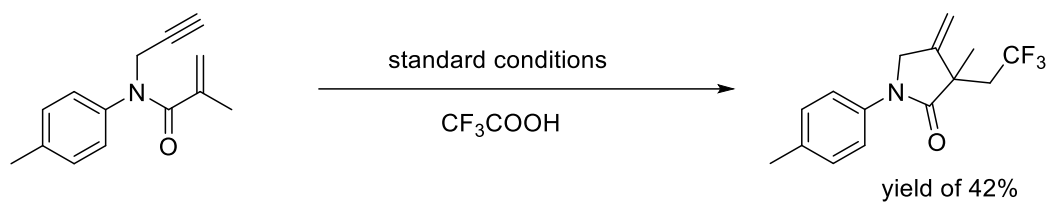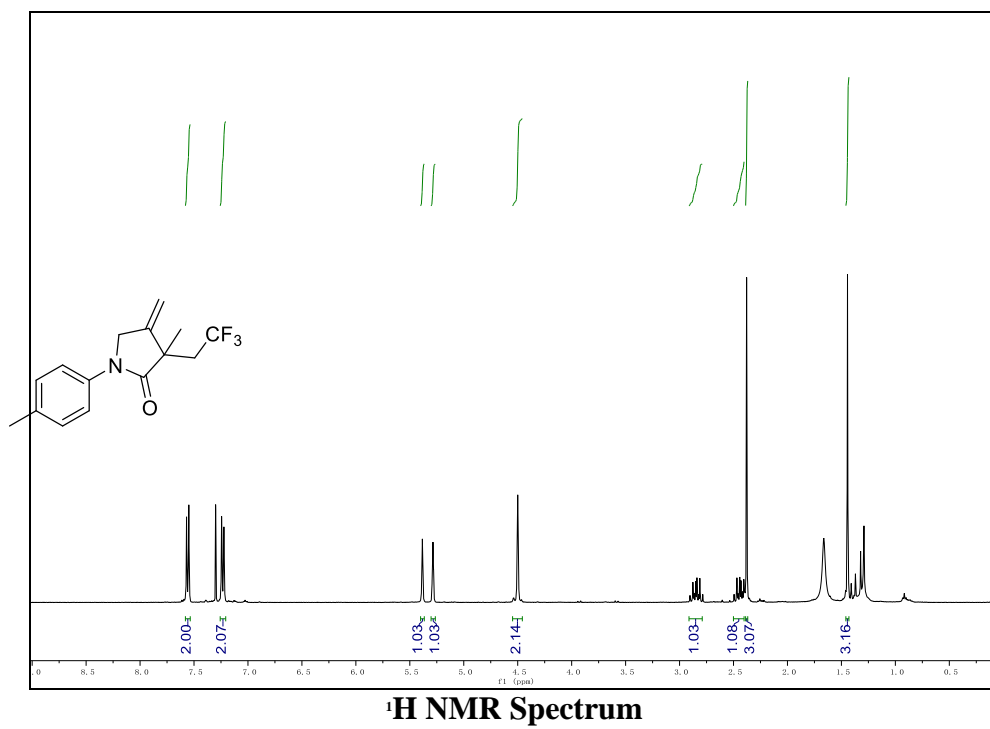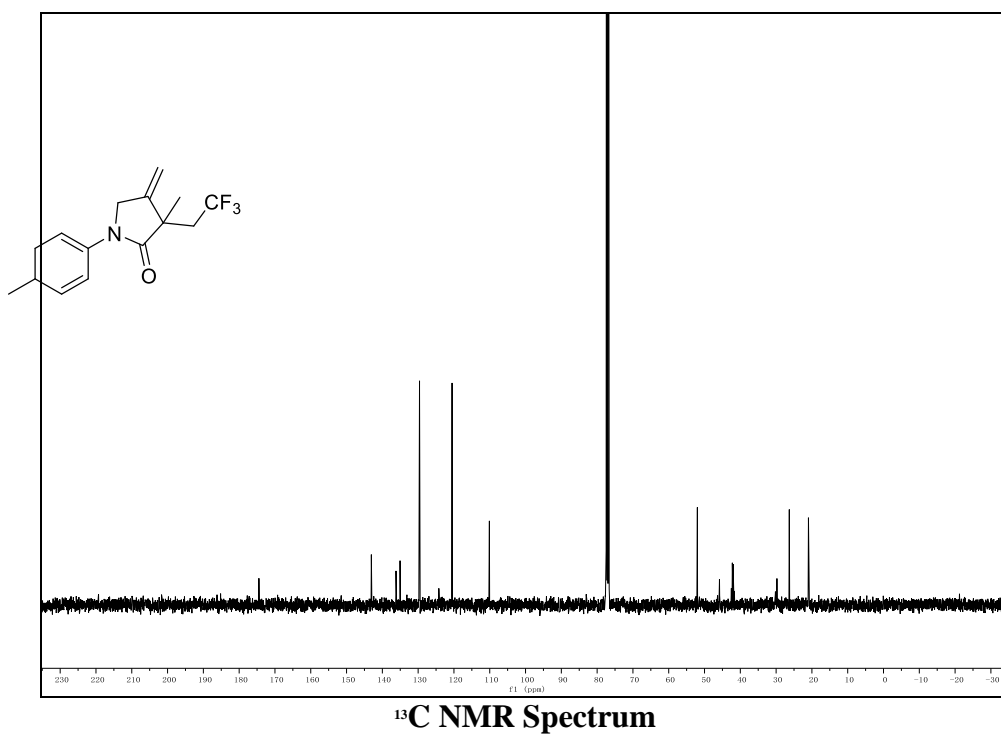

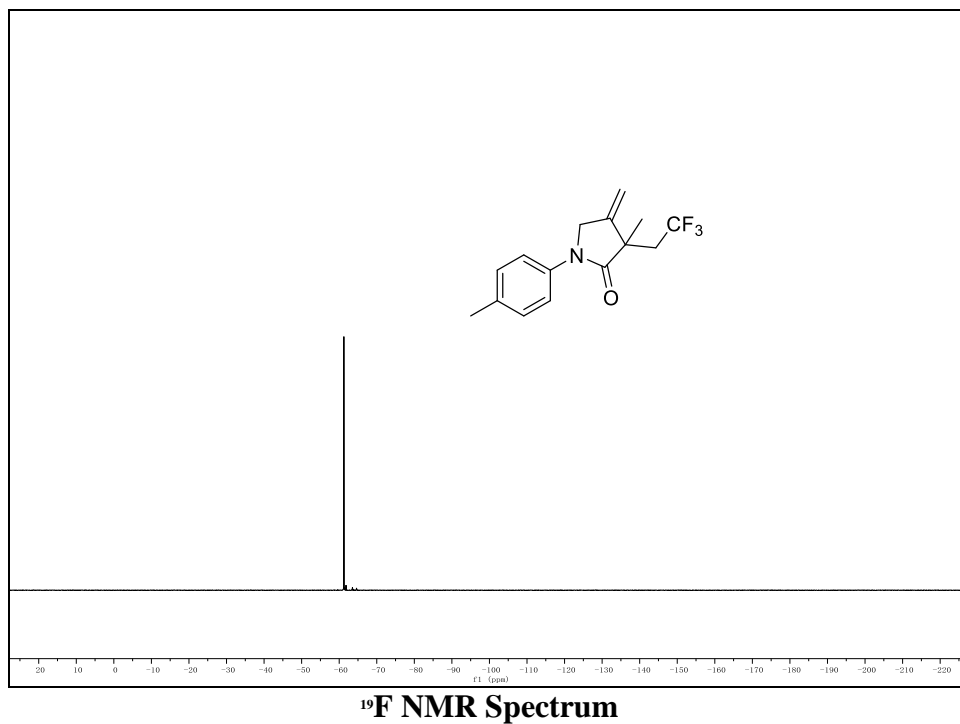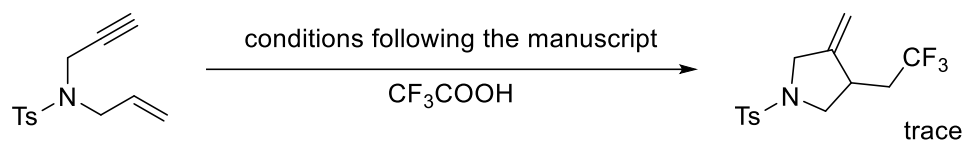

## 5 Substrate Characterization

### N-(2-cyanophenyl)-N-methylmethacrylamide (**1a**)

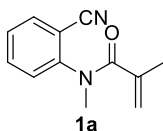

**1a** was prepared following the above mentioned procedure. The spectroscopic data of **1a** matched well those reported in literature.

$^1\text{H}$  NMR (400 MHz, Chloroform-*d*)  $\delta$  7.45 – 7.35 (m, 2H), 7.21 – 7.08 (m, 2H), 4.74 (d,  $J$  = 48.5 Hz, 2H), 3.07 (s, 3H), 1.58 (s, 3H).  $^{13}\text{C}$  NMR (101 MHz, Chloroform-*d*)  $\delta$  171.19, 147.10, 139.78, 134.23, 133.52, 128.65, 128.02, 116.24, 111.54, 19.86. calcd for  $[\text{M}+\text{H}]^+$  201.1022, found 201.1024.

### N-(2-cyanophenyl)-N-ethylmethacrylamide (**1b**)

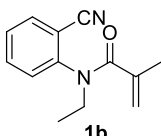

**1b** was prepared following the above mentioned procedure. The spectroscopic data of **1b** matched well those reported in literature.

$^1\text{H}$  NMR (400 MHz, Chloroform-*d*)  $\delta$  7.72 (dd,  $J$  = 7.6, 1.8 Hz, 1H), 7.65 (dd,  $J$  = 8.8, 6.7 Hz, 1H), 7.44 (td,  $J$  = 7.7, 2.1 Hz, 1H), 7.29 (dd,  $J$  = 5.7, 3.7 Hz, 1H), 5.06 (d,  $J$  = 40.2 Hz, 2H), 3.91 (s, 2H), 1.90 (s, 3H), 1.19 (td,  $J$  = 7.1, 2.8 Hz, 3H).  $^{13}\text{C}$  NMR (101 MHz, Chloroform-*d*)  $\delta$  171.25, 145.73, 140.30, 133.84, 132.21, 129.71, 128.01, 116.55, 113.07, 45.20, 20.20, 12.96. calcd for  $[\text{M}+\text{H}]^+$  215.1179, found 215.1180.

### N-benzyl-N-(2-cyanophenyl)methacrylamide (**1c**)

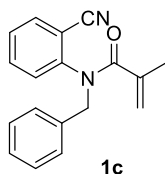

**1c** was prepared following the above mentioned procedure. The spectroscopic data of **1c** matched well those reported in literature.

$^1\text{H}$  NMR (400 MHz, Chloroform-*d*)  $\delta$  7.63 (d,  $J$  = 7.7 Hz, 1H), 7.46 (td,  $J$  = 7.8, 1.6 Hz, 1H), 7.33 (t,  $J$  = 7.6 Hz, 1H), 7.26 (d,  $J$  = 3.9 Hz, 3H), 7.20 (dd,  $J$  = 6.9, 2.9 Hz, 2H), 6.97 (d,  $J$  = 8.1 Hz, 1H), 5.06 (d,  $J$  = 40.5 Hz, 2H), 1.91 (s, 3H).  $^{13}\text{C}$  NMR (101 MHz, Chloroform-*d*)  $\delta$  145.40, 140.09, 136.19, 133.79, 133.51, 129.91, 129.09, 128.62, 127.97, 127.91, 116.43, 112.83, 53.07, 20.30. HRMS (ESI,  $m/z$ ): calcd for  $[\text{M}+\text{H}]^+$  277.1335, found 277.1335.

### N-(2-cyano-6-methylphenyl)-N-methylmethacrylamide (**1d**)

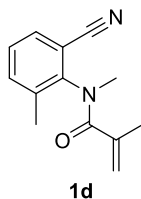

**1d** was prepared following the above mentioned procedure. The spectroscopic data of **1d** matched well those reported in literature.

$^1\text{H}$  NMR (400 MHz, Chloroform-*d*)  $\delta$  7.16 (d,  $J$  = 8.4 Hz, 2H), 7.08 (d,  $J$  = 8.4 Hz, 2H), 5.00 (dd,  $J$  = 3.5, 1.8 Hz, 2H), 4.45 (d,  $J$  = 2.5 Hz, 2H), 2.86 (p,  $J$  = 6.9 Hz, 1H), 2.16 (t,  $J$  = 2.5 Hz, 1H), 1.70 (s, 3H), 1.20 (d,  $J$  = 7.0 Hz, 6H).  $^{13}\text{C}$  NMR (101 MHz, Chloroform-*d*)  $\delta$  171.37, 148.25, 140.05, 139.97, 127.13, 127.10, 119.82, 79.12, 72.00, 39.10, 33.58, 23.82, 20.12. HRMS (ESI,  $m/z$ ): calcd for  $[\text{M}+\text{H}]^+$  242.1539, found 242.1542.

### N-(2-cyano-5-methylphenyl)-N-methylmethacrylamide (**1e**)

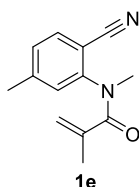

**1e** was prepared following the above mentioned procedure. The spectroscopic data of **1e** matched well those reported in literature.

<sup>1</sup>H NMR (400 MHz, Chloroform-*d*)  $\delta$  7.16 (d, *J* = 8.4 Hz, 2H), 7.08 (d, *J* = 8.4 Hz, 2H), 5.00 (dd, *J* = 3.5, 1.8 Hz, 2H), 4.45 (d, *J* = 2.5 Hz, 2H), 2.86 (p, *J* = 6.9 Hz, 1H), 2.16 (t, *J* = 2.5 Hz, 1H), 1.70 (s, 3H), 1.20 (d, *J* = 7.0 Hz, 6H). <sup>13</sup>C NMR (101 MHz, Chloroform-*d*)  $\delta$  171.37, 148.25, 140.05, 139.97, 127.13, 127.10, 119.82, 79.12, 72.00, 39.10, 33.58, 23.82, 20.12. HRMS (ESI, *m/z*): calcd for [M+H]<sup>+</sup> 242.1539, found 242.1540.

#### 1-methacryloylindoline-7-carbonitrile (**1f**)

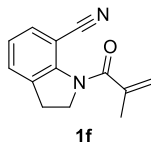

**1f** was prepared following the above mentioned procedure. The spectroscopic data of **1f** matched well those reported in literature.

<sup>1</sup>H NMR (400 MHz, Chloroform-*d*)  $\delta$  7.17 – 7.08 (m, 1H), 6.75 – 6.63 (m, 3H), 4.93 (td, *J* = 3.6, 1.8 Hz, 2H), 4.37 (d, *J* = 2.6 Hz, 2H), 3.64 (d, *J* = 2.8 Hz, 3H), 2.15 (t, *J* = 2.4 Hz, 1H), 1.65 (q, *J* = 1.5 Hz, 3H). <sup>13</sup>C NMR (101 MHz, Chloroform-*d*)  $\delta$  154.69, 139.94, 139.87, 130.68, 129.90, 129.77, 129.36, 129.31, 120.61, 120.55, 118.17, 111.67, 79.23, 71.96, 55.42, 55.37, 37.25, 19.80, 19.72. HRMS (ESI, *m/z*): calcd for [M+H]<sup>+</sup> 230.1176, found 230.1173.

#### N-(2-cyano-5-methoxyphenyl)-N-methylmethacrylamide (**1g**)

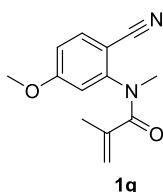

**1g** was prepared following the above mentioned procedure. The spectroscopic data of **1g** matched well those reported in literature.

<sup>1</sup>H NMR (400 MHz, Chloroform-*d*)  $\delta$  7.59 (dd, *J* = 8.7, 2.2 Hz, 1H), 6.88 (dt, *J* = 8.7, 2.4 Hz, 1H), 6.72 (d, *J* = 2.5 Hz, 1H), 5.08 (d, *J* = 24.6 Hz, 2H), 3.85 (d, *J* = 2.2 Hz, 3H), 3.36 (d, *J* = 2.2 Hz, 3H), 1.89 (s, 3H). <sup>13</sup>C NMR (101 MHz, Chloroform-*d*)  $\delta$  171.73, 163.69, 149.29, 140.02, 135.11, 116.65, 114.76, 113.50, 103.49, 55.95, 20.18. HRMS (ESI, *m/z*): calcd for [M+H]<sup>+</sup> 231.1128, found 231.1132.

#### N-(2-cyano-4-methoxyphenyl)-N-methylmethacrylamide (**1h**)

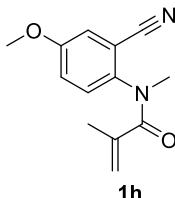

**1h** was prepared following the above mentioned procedure. The spectroscopic data of **1h** matched well those reported in literature.

<sup>1</sup>H NMR (400 MHz, Chloroform-*d*)  $\delta$  7.18 – 7.09 (m, 3H), 5.04 (d, *J* = 34.4 Hz, 2H), 3.85 (d, *J* = 1.0 Hz, 3H), 3.35 (s, 3H), 1.97 – 1.76 (m, 3H). HRMS (ESI, *m/z*): calcd for [M+H]<sup>+</sup> 231.1128, found 231.1126.

#### N-(5-chloro-2-cyanophenyl)-N-methylmethacrylamide (**1i**)

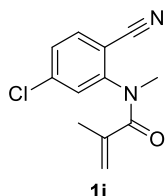

**1i** was prepared following the above mentioned procedure. The spectroscopic data of **1i** matched well those reported in literature.

<sup>1</sup>H NMR (400 MHz, Chloroform-*d*)  $\delta$  7.67 (dd, *J* = 8.3, 1.7 Hz, 1H), 7.43 (dt, *J* = 8.3, 2.0 Hz, 1H), 7.32 (t, *J* = 1.9 Hz, 1H), 5.16 (d, *J* = 62.7 Hz, 2H), 3.45 – 3.40 (m, 3H), 1.97 (s, 3H). <sup>13</sup>C NMR (101 MHz, Chloroform-*d*)  $\delta$  171.55, 148.63, 140.18, 139.71, 134.53, 129.15, 128.40, 115.59, 110.45, 37.90, 20.08. HRMS (ESI, *m/z*): calcd for [M+H]<sup>+</sup> 235.0633, found 235.0633.

N-(4-chloro-2-cyanophenyl)-N-methylmethacrylamide (**1j**)

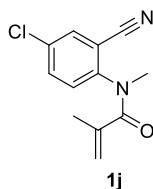

**1j** was prepared following the above mentioned procedure. The spectroscopic data of **1j** matched well those reported in literature.

$^1\text{H}$  NMR (400 MHz, Chloroform-*d*)  $\delta$  7.69 (t,  $J$  = 2.4 Hz, 1H), 7.61 (dt,  $J$  = 8.6, 2.4 Hz, 1H), 7.24 (dd,  $J$  = 8.6, 2.3 Hz, 1H), 5.13 (d,  $J$  = 61.3 Hz, 2H), 3.40 (d,  $J$  = 2.3 Hz, 3H), 1.94 (s, 3H).  $^{13}\text{C}$  NMR (101 MHz, Chloroform-*d*)  $\delta$  171.58, 146.59, 139.75, 137.26, 136.27, 130.11, 121.13, 114.92, 113.70, 37.83, 20.10. HRMS (ESI,  $m/z$ ): calcd for  $[\text{M}+\text{H}]^+$  235.0633, found 235.0630.

N-(3-chloro-2-cyanophenyl)-N-methylmethacrylamide (**1k**)

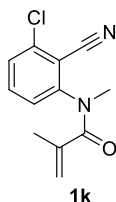

**1k** was prepared following the above mentioned procedure. The spectroscopic data of **1k** matched well those reported in literature.

$^1\text{H}$  NMR (400 MHz, Chloroform-*d*)  $\delta$  7.54 (td,  $J$  = 8.1, 1.3 Hz, 1H), 7.46 (dt,  $J$  = 8.2, 1.2 Hz, 1H), 7.17 (d,  $J$  = 7.9 Hz, 1H), 5.11 (d,  $J$  = 52.8 Hz, 2H), 3.39 (d,  $J$  = 1.3 Hz, 3H), 1.92 (s, 3H). HRMS (ESI,  $m/z$ ): calcd for  $[\text{M}+\text{H}]^+$  235.0633, found 235.0635.

N-(2-cyano-4-nitrophenyl)-N-methylmethacrylamide (**1l**)

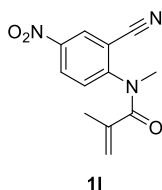

**1l** was prepared following the above mentioned procedure. The spectroscopic data of **1l** matched well those reported in literature.

$^1\text{H}$  NMR (400 MHz, Chloroform-*d*)  $\delta$  8.55 (d,  $J$  = 2.6 Hz, 1H), 8.45 (dd,  $J$  = 8.8, 2.6 Hz, 1H), 7.47 (d,  $J$  = 8.8 Hz, 1H), 5.27 (d,  $J$  = 2.1 Hz, 1H), 5.03 (s, 1H), 3.46 (s, 3H), 1.98 (s, 3H).  $^{13}\text{C}$  NMR (101 MHz, Chloroform-*d*)  $\delta$  171.37, 152.97, 145.87, 139.50, 129.27, 129.17, 128.72, 121.44, 114.48, 112.91, 38.13, 19.88. HRMS (ESI,  $m/z$ ): calcd for  $[\text{M}+\text{H}]^+$  246.0873, found 246.0871.

N-(3-cyanopyridin-2-yl)-N-methylmethacrylamide (**1m**)

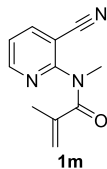

**1m** was prepared following the above mentioned procedure. The spectroscopic data of **1m** matched well those reported in literature.

$^1\text{H}$  NMR (400 MHz, Chloroform-*d*)  $\delta$  8.62 (d,  $J$  = 2.6 Hz, 1H),  $\delta$  8.43 (d,  $J$  = 2.6 Hz, 1H), 7.58 – 7.38 (m, 1H), 5.27 (d,  $J$  = 2.1 Hz, 1H), 5.03 (s, 1H), 3.46 (s, 3H), 1.98 (s, 3H).  $^{13}\text{C}$  NMR (101 MHz, Chloroform-*d*)  $\delta$  171.21, 143.81, 139.69, 130.79, 130.56, 130.41, 126.21, 122.53, 120.64, 78.66, 72.76, 39.15, 20.23. HRMS (ESI,  $m/z$ ): calcd for  $[\text{M}+\text{H}]^+$  202.0275, found 202.0271.

## 6 Substrate Characterization

### 3-(2,2-difluoroethyl)-1,3-dimethylquinoline-2,4(1H,3H)-dione (**3aa**)

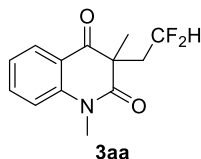

Colorless solid, 44.0mg (87% yield),  $^1\text{H}$  NMR (400 MHz, Chloroform-*d*)  $\delta$  8.05 (dt,  $J = 7.7, 1.6$  Hz, 1H), 7.66 (ddt,  $J = 8.6, 7.4, 1.5$  Hz, 1H), 7.24 – 7.16 (m, 2H), 5.91 (ttd,  $J = 57.0, 5.1, 1.2$  Hz, 1H), 3.49 (s, 3H), 2.78 – 2.67 (m, 2H), 1.49 (s, 3H).  $^{13}\text{C}$  NMR (101 MHz, Chloroform-*d*)  $\delta$  195.60, 172.53, 143.11, 136.53, 128.61, 123.44, 119.40, 117.77, 115.39, 115.02, 113.00, 53.20, 39.79, 39.57, 39.34, 29.99, 26.90.  $^{19}\text{F}$  NMR (376 MHz, Chloroform-*d*)  $\delta$  -115.15 (dq,  $J = 57.0, 14.8$  Hz). HRMS (ESI,  $m/z$ ): calcd for  $[\text{M}+\text{H}]^+$  254.0987, found 254.0986.

### 1,3-dimethyl-3-(2,2,2-trifluoroethyl)quinoline-2,4(1H,3H)-dione (**3ab**)

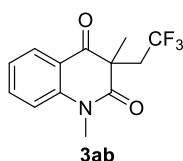

Colorless solid, 29.8mg (55% yield),  $^1\text{H}$  NMR (400 MHz, Chloroform-*d*)  $\delta$  8.09 (d,  $J = 8.0$  Hz, 1H), 7.68 (t,  $J = 7.8$  Hz, 1H), 7.22 (t,  $J = 7.4$  Hz, 2H), 3.51 (s, 3H), 3.07 (q,  $J = 10.2$  Hz, 2H), 1.50 (s, 3H).  $^{13}\text{C}$  NMR (101 MHz, Chloroform-*d*)  $\delta$  194.49, 171.70, 143.18, 136.78, 128.73, 126.75, 123.51, 119.15, 115.11, 52.41, 41.07, 40.78, 40.50, 30.00, 29.77, 27.06.  $^{19}\text{F}$  NMR (376 MHz, Chloroform-*d*)  $\delta$  -60.64 (t,  $J = 10.3$  Hz). HRMS (ESI,  $m/z$ ): calcd for  $[\text{M}+\text{H}]^+$  271.0785, found 271.0785.

### 1,3-dimethyl-3-(2,2,3,3,3-pentafluoropropyl)quinoline-2,4(1H,3H)-dione (**3ac**)

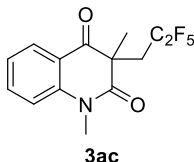

Colorless solid, 45.2mg (71% yield),  $^1\text{H}$  NMR (400 MHz, Chloroform-*d*)  $\delta$  8.09 (d,  $J = 9.5$  Hz, 1H), 7.68 (ddd,  $J = 8.6, 7.3, 1.7$  Hz, 1H), 7.25 – 7.19 (m, 2H), 3.51 (s, 3H), 3.09 – 2.97 (m, 2H), 1.53 (s, 3H).  $^{13}\text{C}$  NMR (101 MHz, Chloroform-*d*)  $\delta$  194.42, 171.74, 143.18, 136.80, 128.77, 123.50, 118.98, 115.13, 51.78, 37.53, 37.32, 37.12, 30.01, 27.51.  $^{19}\text{F}$  NMR (376 MHz, Chloroform-*d*)  $\delta$  -86.27, -110.23 – -113.93 (m). HRMS (ESI,  $m/z$ ): calcd for  $[\text{M}+\text{H}]^+$  322.0861, found 322.0864.

### 3-(2,2,3,3,4,4,4-heptafluorobutyl)-1,3-dimethylquinoline-2,4(1H,3H)-dione (**3ad**)

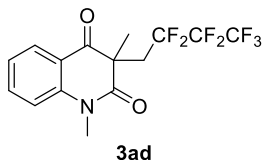

Colorless solid, 43.9mg (59% yield),  $^1\text{H}$  NMR (400 MHz, Chloroform-*d*)  $\delta$  8.09 (dd,  $J = 7.9, 1.7$  Hz, 1H), 7.70 – 7.65 (m, 1H), 7.21 (dt,  $J = 7.5, 3.2$  Hz, 2H), 3.50 (s, 3H), 3.13 – 3.00 (m, 2H), 1.53 (s, 3H).  $^{13}\text{C}$  NMR (101 MHz, Chloroform-*d*)  $\delta$  194.37, 171.73, 143.19, 136.78, 128.77, 123.48, 118.95, 115.12, 51.64, 37.62, 37.42, 37.22, 29.97, 27.54.  $^{19}\text{F}$  NMR (376 MHz, Chloroform-*d*)  $\delta$  -80.33 (t,  $J = 9.8$  Hz), -107.21 – -110.63 (m), -128.05. HRMS (ESI,  $m/z$ ): calcd for  $[\text{M}+\text{H}]^+$  372.0829, found 372.0830.

### 3-(2-chloro-2,2-difluoroethyl)-1,3-dimethylquinoline-2,4(1H,3H)-dione (**3ae**)

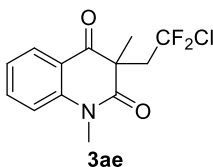

Colorless solid, 42.9mg (75% yield),  $^1\text{H}$  NMR (400 MHz, Chloroform-*d*)  $\delta$  8.09 (dt,  $J$  = 8.0, 1.3 Hz, 1H), 7.67 (ddt,  $J$  = 8.3, 7.2, 1.3 Hz, 1H), 7.24 – 7.18 (m, 2H), 3.50 (s, 3H), 3.38 – 3.27 (m, 2H), 1.50 (s, 3H).  $^{13}\text{C}$  NMR (101 MHz, Chloroform-*d*)  $\delta$  194.50, 171.71, 143.19, 136.76, 128.70, 127.59, 123.47, 119.28, 115.11, 53.00, 49.21, 48.98, 48.74, 29.98, 27.14.  $^{19}\text{F}$  NMR (376 MHz, Chloroform-*d*)  $\delta$  -45.19 – -45.34 (m), -45.69 (dd,  $J$  = 16.6, 11.1 Hz), -46.61 (dd,  $J$  = 16.4, 11.2 Hz), -47.04 (t,  $J$  = 13.9 Hz). HRMS (ESI,  $m/z$ ): calcd for  $[\text{M}+\text{H}]^+$  288.0597, found 288.0593.

3-(2-bromo-2,2-difluoroethyl)-1,3-dimethylquinoline-2,4(1H,3H)-dione (**3af**)

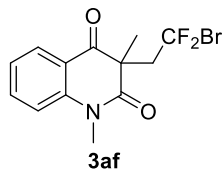

Colorless solid, 57.2mg (82% yield),  $^1\text{H}$  NMR (400 MHz, Chloroform-*d*)  $\delta$  8.09 (dt,  $J$  = 8.0, 1.8 Hz, 1H), 7.70 – 7.64 (m, 1H), 7.24 – 7.18 (m, 2H), 3.50 (s, 3H), 3.49 – 3.39 (m, 2H), 1.49 (s, 3H).  $^{13}\text{C}$  NMR (101 MHz, Chloroform-*d*)  $\delta$  194.41, 171.65, 143.18, 136.76, 128.72, 123.47, 122.61, 119.55, 119.28, 116.50, 115.11, 53.38, 51.79, 51.58, 51.37, 29.99, 27.06.  $^{19}\text{F}$  NMR (376 MHz, Chloroform-*d*)  $\delta$  -39.08 – -39.24 (m), -39.58 (dd,  $J$  = 20.3, 9.7 Hz), -40.93 (dd,  $J$  = 20.4, 10.1 Hz), -41.26 – -41.42 (m). HRMS (ESI,  $m/z$ ): calcd for  $[\text{M}+\text{H}]^+$  332.0092, found 332.0092.

3-(2,2-difluoro-2-phenylethyl)-1,3-dimethylquinoline-2,4(1H,3H)-dione (**3ag**)

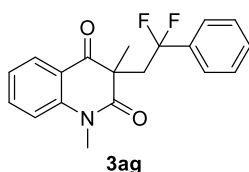

Colorless solid, 44.1mg (67% yield),  $^1\text{H}$  NMR (400 MHz, Chloroform-*d*)  $\delta$  8.10 (ddd,  $J$  = 7.8, 6.2, 1.7 Hz, 1H), 7.64 (ddt,  $J$  = 9.5, 7.6, 3.8 Hz, 1H), 7.39 – 7.28 (m, 5H), 7.18 (ddd,  $J$  = 13.0, 7.7, 1.9 Hz, 2H), 3.44 (s, 3H), 3.14 – 3.00 (m, 2H), 1.50 (s, 3H).  $^{13}\text{C}$  NMR (101 MHz, Chloroform-*d*)  $\delta$  195.72, 172.75, 143.37, 136.45, 133.74, 130.23, 129.96, 128.55, 128.35, 124.99, 124.93, 124.87, 123.20, 119.55, 114.99, 52.21, 48.09, 47.83, 47.57, 29.86, 27.19.  $^{19}\text{F}$  NMR (376 MHz, Chloroform-*d*)  $\delta$  -88.56 – -88.73 (m), -89.29 (dd,  $J$  = 24.1, 9.4 Hz), -92.64 (dd,  $J$  = 24.2, 10.8 Hz), -93.21 – -93.38 (m). HRMS (ESI,  $m/z$ ): calcd for  $[\text{M}+\text{H}]^+$  330.1300, found 330.1301.

3-(2,2-difluoropent-4-en-1-yl)-1,3-dimethylquinoline-2,4(1H,3H)-dione (**3ah**)

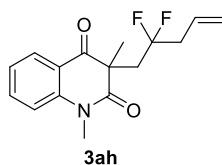

Colorless solid, 38.1mg (65% yield),  $^1\text{H}$  NMR (400 MHz, Chloroform-*d*)  $\delta$  8.08 (dd,  $J$  = 8.0, 1.7 Hz, 1H), 7.64 (ddd,  $J$  = 8.7, 7.3, 1.7 Hz, 1H), 7.19 (dt,  $J$  = 7.5, 3.2 Hz, 2H), 5.73 (ddt,  $J$  = 16.0, 10.9, 7.2 Hz, 1H), 5.25 – 5.15 (m, 2H), 3.49 (s, 3H), 2.92 – 2.72 (m, 2H), 2.55 (ddd,  $J$  = 17.7, 15.6, 7.1 Hz, 2H), 1.47 (s, 3H).  $^{13}\text{C}$  NMR (101 MHz, Chloroform-*d*)  $\delta$  195.87, 172.98, 143.36, 136.38, 129.06, 129.01, 128.55, 123.16, 122.91, 120.86, 119.41, 114.98, 52.13, 44.46, 44.23, 44.00, 42.92, 42.67, 42.41, 29.88, 26.95.  $^{19}\text{F}$  NMR (376 MHz, Chloroform-*d*)  $\delta$  -90.29 (dt,  $J$  = 33.7, 16.5 Hz), -90.80 – -91.07 (m), -93.01 (ddd,  $J$  = 27.2, 22.0, 14.0 Hz), -93.65 (dt,  $J$  = 32.7, 16.2 Hz). HRMS (ESI,  $m/z$ ): calcd for  $[\text{M}+\text{H}]^+$  294.1300, found 294.1296.

3-(2,2-difluoropropyl)-1,3-dimethylquinoline-2,4(1H,3H)-dione (**3ai**)

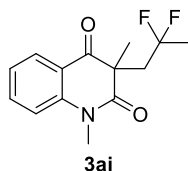

Colorless solid, 29.9mg (56% yield),  $^1\text{H}$  NMR (400 MHz, Chloroform-*d*)  $\delta$  8.08 (dd,  $J$  = 8.0, 1.7 Hz, 1H), 7.64 (ddd,  $J$  = 8.6, 7.3, 1.7 Hz, 1H), 7.22 – 7.15 (m, 2H), 3.49 (s, 3H), 2.89 – 2.77 (m, 2H), 1.55 (t,  $J$  = 18.7 Hz, 3H), 1.46 (s, 3H).  $^{13}\text{C}$  NMR (101 MHz, Chloroform-*d*)  $\delta$  195.86, 172.97, 143.33, 136.39, 128.53, 123.18, 122.98, 119.45, 114.98, 52.34, 46.13, 45.89, 45.65, 29.87, 26.95, 25.40, 25.13, 24.86.  $^{19}\text{F}$  NMR (376 MHz, Chloroform-*d*)  $\delta$  -83.66 – -83.87 (m), -84.41 (td,  $J$  = 19.2, 12.3 Hz), -86.32 (td,  $J$  = 19.1, 12.0 Hz), -86.96 (dd,  $J$  = 34.2, 17.4 Hz). HRMS (ESI,  $m/z$ ): calcd for  $[\text{M}+\text{H}]^+$  268.1144, found 268.1144.

3-(2-fluoropropyl)-1,3-dimethylquinoline-2,4(1H,3H)-dione (**3aj**)

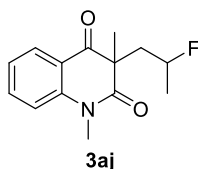

Colorless oil, 28.4mg (57% yield),  $^1\text{H}$  NMR (400 MHz, Chloroform-*d*)  $\delta$  8.05 (dd,  $J = 8.0, 1.7$  Hz, 1H), 7.64 (ddd,  $J = 8.8, 7.3, 1.7$  Hz, 1H), 7.21 – 7.15 (m, 2H), 4.74 – 4.52 (m, 1H), 3.47 (s, 3H), 2.64 (ddd,  $J = 14.1, 10.6, 7.9$  Hz, 1H), 2.22 (ddd,  $J = 38.3, 14.1, 2.9$  Hz, 1H), 1.48 (s, 3H), 1.27 (dd,  $J = 24.3, 6.1$  Hz, 3H).  $^{13}\text{C}$  NMR (101 MHz, Chloroform-*d*)  $\delta$  197.37, 173.76, 143.76, 136.46, 128.23, 122.97, 119.80, 114.94, 89.18, 87.54, 54.17, 45.27, 45.08, 29.88, 26.21, 21.55, 21.33.  $^{19}\text{F}$  NMR (376 MHz, Chloroform-*d*)  $\delta$  -175.33 (ddtd,  $J = 62.7, 48.2, 23.9, 7.7$  Hz). HRMS (ESI,  $m/z$ ): calcd for  $[\text{M}+\text{H}]^+$  250.1238, found 250.1242.

**3-(2-fluoro-2-methylpropyl)-1,3-dimethylquinoline-2,4(1H,3H)-dione (3ak)**

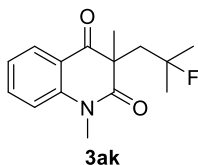

Colorless oil, 42.6mg (81% yield),  $^1\text{H}$  NMR (400 MHz, Chloroform-*d*)  $\delta$  8.08 (dd,  $J = 8.0, 1.7$  Hz, 1H), 7.62 (ddd,  $J = 8.6, 7.4, 1.7$  Hz, 1H), 7.17 (dt,  $J = 7.4, 3.1$  Hz, 2H), 3.48 (s, 3H), 2.64 (dd,  $J = 15.4, 2.1$  Hz, 2H), 1.43 (s, 3H), 1.28 (dd,  $J = 22.0, 14.0$  Hz, 6H).  $^{13}\text{C}$  NMR (101 MHz, Chloroform-*d*)  $\delta$  196.82, 173.85, 143.29, 136.15, 128.47, 123.04, 119.65, 114.87, 95.89, 94.22, 53.82, 53.76, 48.71, 48.51, 29.79, 29.66, 29.41, 29.09, 28.84, 27.61.  $^{19}\text{F}$  NMR (376 MHz, Chloroform-*d*)  $\delta$  -134.85 (ddd,  $J = 22.0, 15.6, 6.9$  Hz). HRMS (ESI,  $m/z$ ): calcd for  $[\text{M}+\text{H}]^+$  264.1394, found 264.1391.

**3-((1-fluorocyclopropyl)methyl)-1,3-dimethylquinoline-2,4(1H,3H)-dione (3al)**

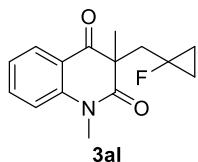

Colorless oil, 43.8mg (84% yield),  $^1\text{H}$  NMR (400 MHz, Chloroform-*d*)  $\delta$  8.06 (dd,  $J = 8.0, 1.7$  Hz, 1H), 7.63 (ddd,  $J = 8.7, 7.4, 1.7$  Hz, 1H), 7.20 – 7.14 (m, 2H), 3.48 (s, 3H), 2.56 (d,  $J = 21.2$  Hz, 2H), 1.53 (s, 3H), 0.87 – 0.67 (m, 2H), 0.58 – 0.41 (m, 2H).  $^{13}\text{C}$  NMR (101 MHz, Chloroform-*d*)  $\delta$  197.19, 173.59, 143.48, 136.19, 128.21, 123.02, 120.06, 114.82, 76.20, 54.17, 45.57, 45.38, 29.76, 25.31, 11.27, 11.15, 10.94, 10.82.  $^{19}\text{F}$  NMR (376 MHz, Chloroform-*d*)  $\delta$  -177.99 (tt,  $J = 19.8, 9.7$  Hz). HRMS (ESI,  $m/z$ ): calcd for  $[\text{M}+\text{H}]^+$  262.1238, found 262.1239.

**3-(2,2-difluoroethyl)-1-ethyl-3-methylquinoline-2,4(1H,3H)-dione (3ba)**

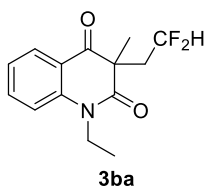

Colorless solid, 46.4mg (87% yield),  $^1\text{H}$  NMR (400 MHz, Chloroform-*d*)  $\delta$  8.05 (dd,  $J = 7.9, 1.7$  Hz, 1H), 7.65 (ddd,  $J = 8.7, 7.4, 1.7$  Hz, 1H), 7.18 (dt,  $J = 7.4, 3.2$  Hz, 2H), 5.91 (tt,  $J = 57.0, 5.1$  Hz, 1H), 4.12 (ddt,  $J = 16.8, 14.4, 7.2$  Hz, 2H), 2.79 – 2.67 (m, 2H), 1.48 (s, 3H), 1.28 (t,  $J = 7.1$  Hz, 3H).  $^{13}\text{C}$  NMR (101 MHz, Chloroform-*d*)  $\delta$  195.77, 172.11, 142.03, 136.56, 128.92, 123.22, 119.62, 117.81, 115.42, 114.90, 113.03, 53.02, 39.80, 39.58, 39.36, 37.55, 26.75, 12.22.  $^{19}\text{F}$  NMR (376 MHz, Chloroform-*d*)  $\delta$  -115.11 (dq,  $J = 57.1, 14.8$  Hz). HRMS (ESI,  $m/z$ ): calcd for  $[\text{M}+\text{H}]^+$  268.1144, found 268.1145.

**1-benzyl-3-(2,2-difluoroethyl)-3-methylquinoline-2,4(1H,3H)-dione (3ca)**

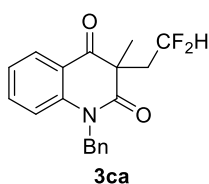

Colorless solid, 59.9mg (91% yield),  $^1\text{H}$  NMR (400 MHz, Chloroform-*d*)  $\delta$  8.06 (dd,  $J = 7.9, 1.7$  Hz, 1H), 7.49 (td,  $J = 8.0, 7.5, 1.7$  Hz, 1H), 7.33 (t,  $J = 7.4$  Hz, 2H), 7.27 (d,  $J = 7.0$  Hz, 1H), 7.22 (d,  $J = 7.6$  Hz, 2H), 7.15 (t,  $J = 7.5$  Hz, 1H), 7.07 (d,  $J = 8.4$  Hz, 1H), 6.00 (tt,  $J = 57.1, 5.1$  Hz, 1H), 5.32 (d,  $J = 5.0$  Hz, 2H), 2.83 (td,  $J = 15.9, 5.1$  Hz, 2H),

1.59 (s, 3H).  $^{13}\text{C}$  NMR (101 MHz, Chloroform-*d*)  $\delta$  195.46, 172.95, 142.35, 136.45, 135.80, 129.09, 128.71, 127.59, 126.26, 123.53, 119.58, 116.02, 115.49, 46.27, 39.48, 39.26, 39.04, 27.30.  $^{19}\text{F}$  NMR (376 MHz, Chloroform-*d*)  $\delta$  -115.16 (dq,  $J$  = 57.2, 15.3 Hz). HRMS (ESI,  $m/z$ ): calcd for  $[\text{M}+\text{H}]^+$  330.1300, found 330.1301.

### 3-(2,2-difluoroethyl)-1,3,8-trimethylquinoline-2,4(1H,3H)-dione (**3da**)

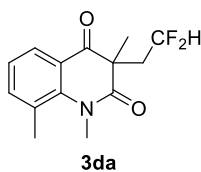

Colorless solid, 44.2mg (83% yield),  $^1\text{H}$  NMR (400 MHz, Chloroform-*d*)  $\delta$  7.73 (dd,  $J$  = 7.6, 1.8 Hz, 1H), 7.44 (dd,  $J$  = 7.6, 1.7 Hz, 1H), 7.14 (t,  $J$  = 7.6 Hz, 1H), 6.09 (tt,  $J$  = 57.2, 5.0 Hz, 1H), 3.44 (s, 3H), 2.57 (td,  $J$  = 16.0, 5.0 Hz, 2H), 2.50 (s, 3H), 1.44 (s, 3H).  $^{13}\text{C}$  NMR (101 MHz, Chloroform-*d*)  $\delta$  196.93, 173.36, 143.74, 139.68, 127.18, 125.87, 124.59, 123.13, 118.02, 115.64, 113.25, 54.01, 38.90, 38.67, 38.44, 37.48, 24.29, 21.97.  $^{19}\text{F}$  NMR (376 MHz, Chloroform-*d*)  $\delta$  -113.69 (t,  $J$  = 16.1 Hz), -113.84 (t,  $J$  = 16.1 Hz). HRMS (ESI,  $m/z$ ): calcd for  $[\text{M}+\text{H}]^+$  268.1144, found 268.1140.

### 3-(2,2-difluoroethyl)-1,3,7-trimethylquinoline-2,4(1H,3H)-dione (**3ea**)

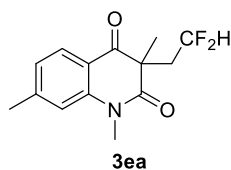

Colorless solid, 43.6mg (82% yield),  $^1\text{H}$  NMR (400 MHz, Chloroform-*d*)  $\delta$  7.97 – 7.90 (m, 1H), 7.04 – 6.96 (m, 2H), 5.88 (tt,  $J$  = 57.0, 5.1, 1.2 Hz, 1H), 3.47 (s, 3H), 2.77 – 2.64 (m, 2H), 2.46 (s, 3H), 1.46 (s, 3H).  $^{13}\text{C}$  NMR (101 MHz, Chloroform-*d*)  $\delta$  195.20, 172.82, 148.12, 143.17, 128.64, 124.50, 117.83, 117.19, 115.52, 115.44, 113.06, 52.96, 52.90, 39.86, 39.63, 39.41, 29.93, 27.06, 22.52.  $^{19}\text{F}$  NMR (376 MHz, Chloroform-*d*)  $\delta$  -115.03 – -115.44 (m). HRMS (ESI,  $m/z$ ): calcd for  $[\text{M}+\text{H}]^+$  268.1144, found 268.1143.

### 5-(2,2-difluoroethyl)-5-methyl-1,2-dihydro-4H-pyrrolo[3,2,1-ij]quinoline-4,6(5H)-dione (**3fa**)

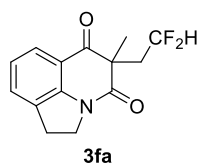

Colorless solid, 28.9mg (55% yield),  $^1\text{H}$  NMR (400 MHz, Chloroform-*d*)  $\delta$  7.70 (d,  $J$  = 7.9 Hz, 1H), 7.46 (d,  $J$  = 7.3 Hz, 1H), 7.09 (td,  $J$  = 7.7, 1.7 Hz, 1H), 6.01 – 5.68 (m, 1H), 4.25 – 4.13 (m, 2H), 3.32 (t,  $J$  = 8.5 Hz, 2H), 2.79 – 2.65 (m, 2H), 1.49 (s, 3H).  $^{13}\text{C}$  NMR (101 MHz, Chloroform-*d*)  $\delta$  195.91, 170.75, 145.84, 132.04, 130.97, 124.77, 124.05, 116.09, 115.36, 45.99, 40.04, 39.82, 39.60, 26.99, 26.81.  $^{19}\text{F}$  NMR (376 MHz, Chloroform-*d*)  $\delta$  -115.35 (dtd,  $J$  = 56.7, 16.1, 7.8 Hz). HRMS (ESI,  $m/z$ ): calcd for  $[\text{M}+\text{H}]^+$  266.0987, found 266.0983.

### 3-(2,2-difluoroethyl)-7-methoxy-1,3-dimethylquinoline-2,4(1H,3H)-dione (**3ga**)

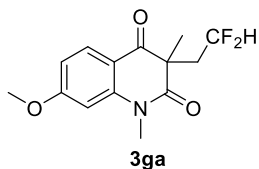

Colorless solid, 44.3mg (79% yield),  $^1\text{H}$  NMR (400 MHz, Chloroform-*d*)  $\delta$  8.03 (d,  $J$  = 8.7 Hz, 1H), 6.72 (dd,  $J$  = 8.8, 2.2 Hz, 1H), 6.62 (d,  $J$  = 2.2 Hz, 1H), 5.87 (tt,  $J$  = 57.0, 5.1 Hz, 1H), 3.92 (s, 3H), 3.46 (s, 3H), 2.76 – 2.65 (m, 2H), 1.47 (s, 3H).  $^{13}\text{C}$  NMR (101 MHz, Chloroform-*d*)  $\delta$  194.02, 173.10, 166.34, 145.12, 131.12, 117.83, 115.45, 113.21, 113.06, 108.63, 101.04, 55.89, 52.59, 40.06, 39.84, 39.62, 29.93, 27.18.  $^{19}\text{F}$  NMR (376 MHz, Chloroform-*d*)  $\delta$  -115.05 – -115.52 (m). HRMS (ESI,  $m/z$ ): calcd for  $[\text{M}+\text{H}]^+$  284.1093, found 284.1097.

### 3-(2,2-difluoroethyl)-6-methoxy-1,3-dimethylquinoline-2,4(1H,3H)-dione (**3ha**)

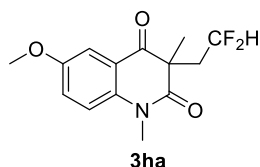

Colorless solid, 36.6mg (65% yield),  $^1\text{H}$  NMR (400 MHz, Chloroform-*d*)  $\delta$  7.55 (d,  $J$  = 3.1 Hz, 1H), 7.27 (dd,  $J$  = 9.0, 3.1 Hz, 1H), 7.17 (d,  $J$  = 9.0 Hz, 1H), 5.93 (tt,  $J$  = 57.0, 5.1 Hz, 1H), 3.89 (s, 3H), 3.50 (s, 3H), 2.82 – 2.70 (m, 2H), 1.52 (s, 3H).  $^{13}\text{C}$  NMR (101 MHz, Chloroform-*d*)  $\delta$  195.68, 172.07, 155.68, 137.24, 124.54, 119.99, 117.81, 116.62, 115.43, 113.04, 110.07, 55.86, 52.93, 39.87, 39.65, 39.43, 30.05, 27.06.  $^{19}\text{F}$  NMR (376 MHz, Chloroform-*d*)  $\delta$  -115.13 (t,  $J$  = 16.1 Hz), -115.29 (t,  $J$  = 16.1 Hz). HRMS (ESI,  $m/z$ ): calcd for  $[\text{M}+\text{H}]^+$  284.1093, found 284.1088.

7-chloro-3-(2,2-difluoroethyl)-1,3-dimethylquinoline-2,4(1H,3H)-dione (**3ia**)

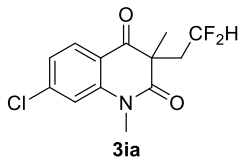

Yellow solid, 51.0mg (88% yield),  $^1\text{H}$  NMR (400 MHz, Chloroform-*d*)  $\delta$  7.96 (d,  $J$  = 8.3 Hz, 1H), 7.21 – 7.12 (m, 2H), 5.86 (tt,  $J$  = 56.9, 5.0 Hz, 1H), 3.48 – 3.43 (m, 3H), 2.70 (tt,  $J$  = 16.2, 4.5 Hz, 2H), 1.46 (s, 3H).  $^{13}\text{C}$  NMR (101 MHz, Chloroform-*d*)  $\delta$  194.45, 172.53, 144.04, 142.90, 129.98, 123.70, 117.70, 117.64, 115.39, 115.25, 112.86, 53.17, 39.81, 39.59, 39.37, 30.09, 26.91.  $^{19}\text{F}$  NMR (376 MHz, Chloroform-*d*)  $\delta$  -115.15 (dt,  $J$  = 57.0, 16.1 Hz). HRMS (ESI,  $m/z$ ): calcd for  $[\text{M}+\text{H}]^+$  288.0597, found 288.0593.

6-chloro-3-(2,2-difluoroethyl)-1,3-dimethylquinoline-2,4(1H,3H)-dione (**3ja**)

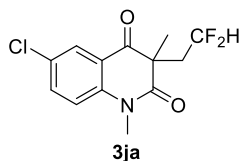

Yellow solid, 46.4mg (81% yield),  $^1\text{H}$  NMR (400 MHz, Chloroform-*d*)  $\delta$  7.99 (d,  $J$  = 2.6 Hz, 1H), 7.60 (dd,  $J$  = 8.8, 2.6 Hz, 1H), 7.14 (d,  $J$  = 8.9 Hz, 1H), 5.89 (tt,  $J$  = 56.9, 5.0 Hz, 1H), 3.47 (s, 3H), 2.73 (tt,  $J$  = 16.3, 3.9 Hz, 2H), 1.48 (s, 3H).  $^{13}\text{C}$  NMR (101 MHz, Chloroform-*d*)  $\delta$  194.54, 172.19, 141.61, 136.13, 129.30, 128.04, 120.37, 117.62, 116.69, 115.23, 112.84, 53.21, 39.78, 39.56, 39.34, 30.17, 26.87.  $^{19}\text{F}$  NMR (376 MHz, Chloroform-*d*)  $\delta$  -115.11 (t,  $J$  = 16.1 Hz), -115.26 (t,  $J$  = 16.1 Hz). HRMS (ESI,  $m/z$ ): calcd for  $[\text{M}+\text{H}]^+$  288.0597, found 288.0601.

5-chloro-3-(2,2-difluoroethyl)-1,3-dimethylquinoline-2,4(1H,3H)-dione (**3ka**)

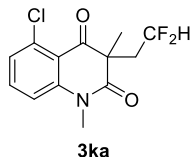

Yellow solid, 43.3mg (76% yield),  $^1\text{H}$  NMR (400 MHz, Chloroform-*d*)  $\delta$  7.54 – 7.45 (m, 1H), 7.23 (dd,  $J$  = 7.8, 1.9 Hz, 1H), 7.12 (d,  $J$  = 8.4 Hz, 1H), 6.23 – 5.89 (m, 1H), 3.46 (s, 3H), 2.63 (dddd,  $J$  = 18.7, 9.5, 4.9, 2.3 Hz, 2H), 1.48 (s, 3H).  $^{13}\text{C}$  NMR (101 MHz, Chloroform-*d*)  $\delta$  193.89, 171.37, 144.40, 135.70, 134.69, 126.76, 118.06, 117.72, 115.34, 113.87, 112.95, 54.76, 38.81, 38.58, 38.35, 30.96, 24.38.  $^{19}\text{F}$  NMR (376 MHz, Chloroform-*d*)  $\delta$  -113.09 (dt,  $J$  = 57.0, 15.2 Hz), -113.86 (ddd,  $J$  = 57.0, 19.5, 10.8 Hz), -114.60 (ddd,  $J$  = 57.1, 21.6, 11.7 Hz), -115.21 – -115.54 (m). HRMS (ESI,  $m/z$ ): calcd for  $[\text{M}+\text{H}]^+$  288.0597, found 288.0597.

3-(2,2-difluoroethyl)-1,3-dimethyl-6-nitroquinoline-2,4(1H,3H)-dione (**3la**)

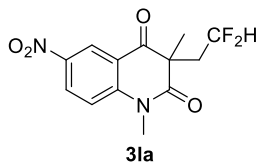

Yellow solid, 46.5mg (78% yield),  $^1\text{H}$  NMR (400 MHz, Chloroform-*d*)  $\delta$  8.88 (d,  $J$  = 2.7 Hz, 1H), 8.49 (dd,  $J$  = 9.2, 2.7 Hz, 1H), 7.34 (d,  $J$  = 9.2 Hz, 1H), 5.91 (tt,  $J$  = 56.8, 4.9 Hz, 1H), 3.57 (s, 3H), 2.78 (tt,  $J$  = 16.3, 4.7 Hz, 2H), 1.52 (s, 3H).  $^{13}\text{C}$  NMR (101 MHz, Chloroform-*d*)  $\delta$  193.64, 172.48, 147.34, 143.26, 130.81, 124.61, 119.24, 117.39, 115.99, 115.00, 112.61, 53.49, 39.91, 39.69, 39.47, 30.67, 26.79.  $^{19}\text{F}$  NMR (376 MHz, Chloroform-*d*)  $\delta$  -114.99 (t,  $J$  = 15.9 Hz), -115.14 (t,  $J$  = 16.1 Hz). HRMS (ESI,  $m/z$ ): calcd for  $[\text{M}+\text{H}]^+$  299.0838, found 299.0838.

3-(2,2-difluoroethyl)-1,3-dimethyl-1,8-naphthyridine-2,4(1H,3H)-dione (**3ma**)

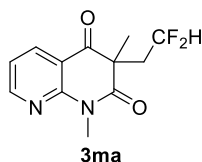

Colorless solid, 32.4mg (64% yield),  $^1\text{H}$  NMR (400 MHz, Chloroform-*d*)  $\delta$  8.67 – 8.57 (m, 1H), 8.29 (dt,  $J$  = 7.7, 1.3 Hz, 1H), 7.19 – 7.13 (m, 1H), 5.90 (tt,  $J$  = 56.8, 5.0 Hz, 1H), 3.61 (s, 3H), 2.85 – 2.67 (m, 2H), 1.51 (s, 3H).  $^{13}\text{C}$  NMR (101 MHz, Chloroform-*d*)  $\delta$  195.07, 173.14, 154.67, 154.09, 137.14, 119.17, 117.60, 115.21, 114.59, 112.82, 53.31, 39.91, 39.69, 39.46, 28.87, 26.99.  $^{19}\text{F}$  NMR (376 MHz, Chloroform-*d*)  $\delta$  -114.99 – -115.41 (m). HRMS (ESI,  $m/z$ ): calcd for  $[\text{M}+\text{H}]^+$  255.0490, found 255.0487.

1-ethyl-3-methyl-3-(2,2,2-trifluoroethyl)quinoline-2,4(1H,3H)-dione (**3bb**)

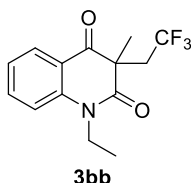

Colorless solid, 34.0mg (60% yield),  $^1\text{H}$  NMR (400 MHz, Chloroform-*d*)  $\delta$  8.09 (dd,  $J$  = 7.9, 1.8 Hz, 1H), 7.66 (td,  $J$  = 7.8, 7.4, 1.8 Hz, 1H), 7.19 (t,  $J$  = 7.7 Hz, 2H), 4.13 (ddq,  $J$  = 76.4, 14.3, 7.1 Hz, 2H), 3.06 (qd,  $J$  = 10.3, 1.7 Hz, 2H), 1.49 (s, 3H), 1.28 (t,  $J$  = 7.1 Hz, 3H).  $^{13}\text{C}$  NMR (101 MHz, Chloroform-*d*)  $\delta$  194.62, 171.27, 142.10, 136.82, 129.04, 123.29, 119.38, 115.02, 52.16, 52.14, 41.12, 40.83, 40.54, 40.26, 37.54, 26.96, 12.05.  $^{19}\text{F}$  NMR (376 MHz, Chloroform-*d*)  $\delta$  -60.60 (t,  $J$  = 10.3 Hz). HRMS (ESI,  $m/z$ ): calcd for  $[\text{M}+\text{H}]^+$  286.1049, found 286.1053.

1,3,7-trimethyl-3-(2,2,2-trifluoroethyl)quinoline-2,4(1H,3H)-dione (**3cb**)

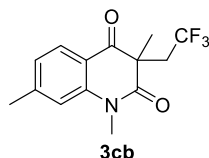

Colorless solid, 41.5g (73% yield),  $^1\text{H}$  NMR (400 MHz, Chloroform-*d*)  $\delta$  7.97 (d,  $J$  = 7.9 Hz, 1H), 7.04 – 6.99 (m, 2H), 3.49 (s, 3H), 3.05 (q,  $J$  = 10.3 Hz, 2H), 2.47 (s, 3H), 1.48 (s, 3H).  $^{13}\text{C}$  NMR (101 MHz, Chloroform-*d*)  $\delta$  194.03, 171.98, 148.37, 143.22, 128.76, 124.57, 124.00, 116.99, 115.58, 52.15, 41.09, 40.81, 40.52, 40.23, 29.93, 27.14, 22.53.  $^{19}\text{F}$  NMR (376 MHz, Chloroform-*d*)  $\delta$  -60.75 (t,  $J$  = 10.3 Hz). HRMS (ESI,  $m/z$ ): calcd for  $[\text{M}+\text{H}]^+$  286.1049, found 286.1049.

7-methoxy-1,3-dimethyl-3-(2,2,2-trifluoroethyl)quinoline-2,4(1H,3H)-dione (**3db**)

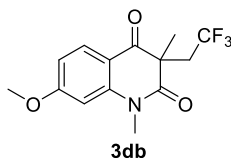

Colorless solid, 20.9mg (80% yield),  $^1\text{H}$  NMR (400 MHz, Chloroform-*d*)  $\delta$  8.10 – 8.01 (m, 1H), 6.73 (dq,  $J$  = 8.8, 2.0 Hz, 1H), 6.64 (q,  $J$  = 2.1 Hz, 1H), 3.92 (s, 3H), 3.47 (s, 3H), 3.08 – 2.95 (m, 2H), 1.48 (s, 3H).  $^{13}\text{C}$  NMR (101 MHz, Chloroform-*d*)  $\delta$  192.82, 172.24, 166.50, 145.14, 131.26, 113.02, 108.74, 101.12, 55.90, 51.79, 40.86, 40.57, 40.29, 29.94, 27.27.  $^{19}\text{F}$  NMR (376 MHz, Chloroform-*d*)  $\delta$  -60.93 (t,  $J$  = 10.3 Hz). HRMS (ESI,  $m/z$ ): calcd for  $[\text{M}+\text{H}]^+$  302.0999, found 302.1001.

7-chloro-1,3-dimethyl-3-(2,2,2-trifluoroethyl)quinoline-2,4(1H,3H)-dione (**3eb**)

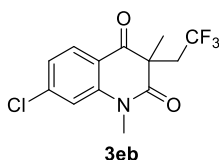

Yellow solid, 45.5mg (75% yield),  $^1\text{H}$  NMR (400 MHz, Chloroform-*d*)  $\delta$  8.02 (dd,  $J$  = 8.3, 1.7 Hz, 1H), 7.22 – 7.16 (m, 2H), 3.48 (s, 3H), 3.06 (qd,  $J$  = 10.3, 1.7 Hz, 2H), 1.49 (s, 3H).  $^{13}\text{C}$  NMR (101 MHz, Chloroform-*d*)  $\delta$  193.40, 171.70, 144.09, 143.24, 130.11, 126.65, 123.83, 117.48, 115.50, 52.38, 41.16, 40.87, 40.59, 40.30, 30.13, 27.05.  $^{19}\text{F}$  NMR (376 MHz, Chloroform-*d*)  $\delta$  -60.71 (t,  $J$  = 10.2 Hz). HRMS (ESI,  $m/z$ ): calcd for  $[\text{M}+\text{H}]^+$  306.0503, found 306.0505.

## 7 References

- [1] S. Arai, Y. Koike, A. Nishida, *Advanced Synthesis & Catalysis* **2010**, 352, 893-900.
- [2] D. Qi, J. Bai, H. Zhang, B. Li, Z. Song, N. Ma, L. Guo, L. Song, W. Xia, *Green Chemistry* **2022**, 24, 5046-5051.

## 8 Copies of $^1\text{H}$ , $^{13}\text{C}$ and $^{19}\text{F}$ NMR Spectra for Substrates

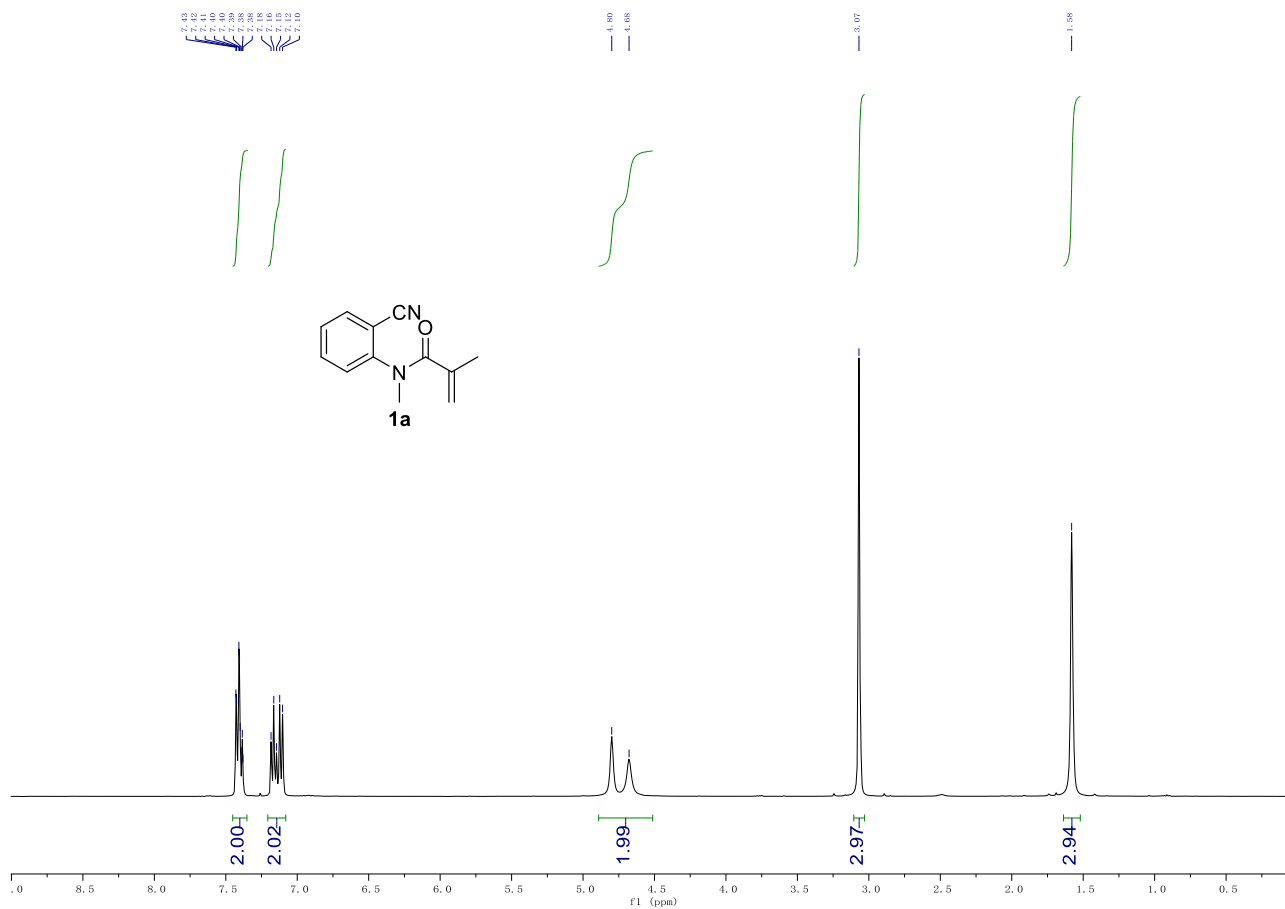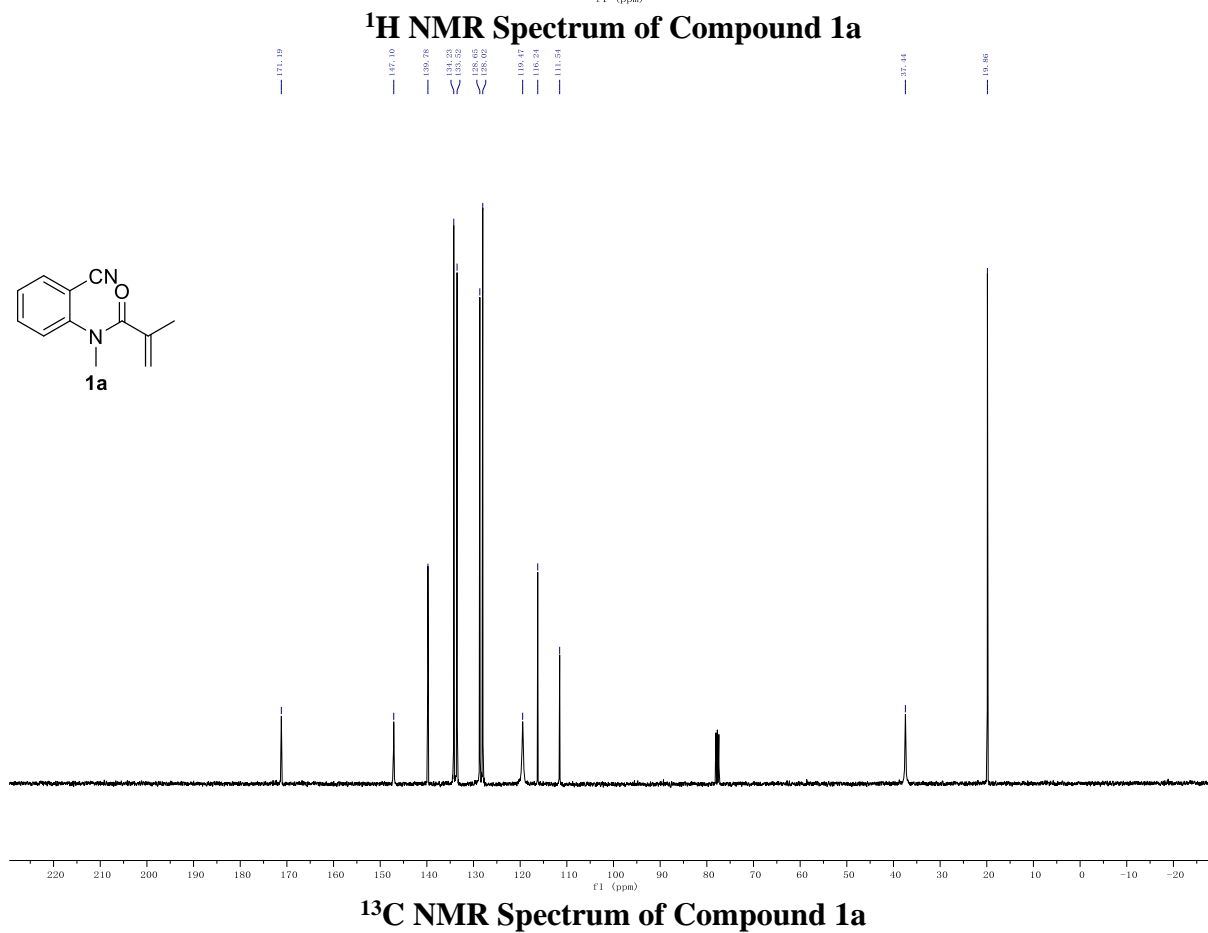

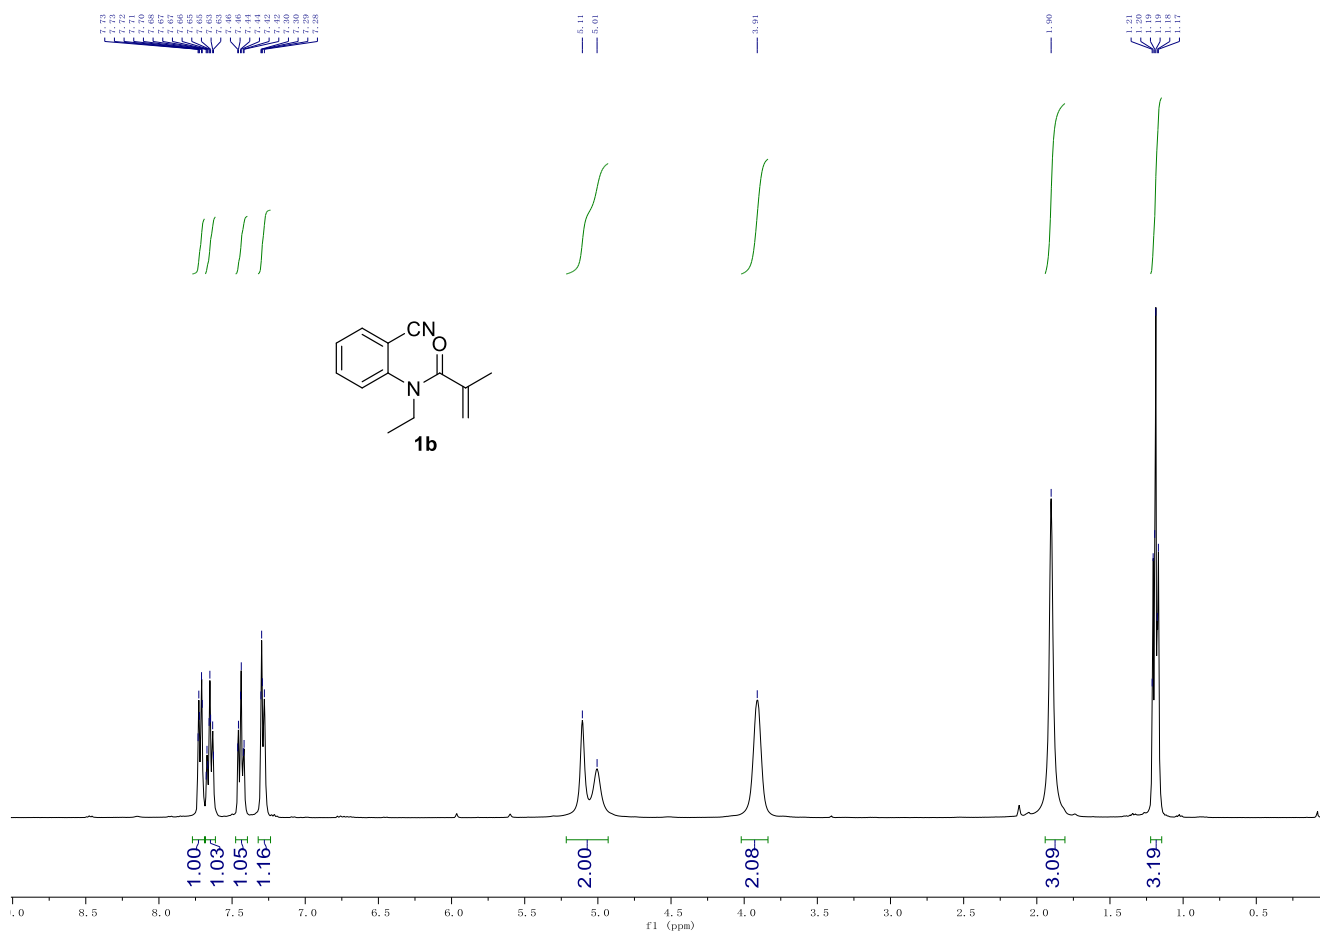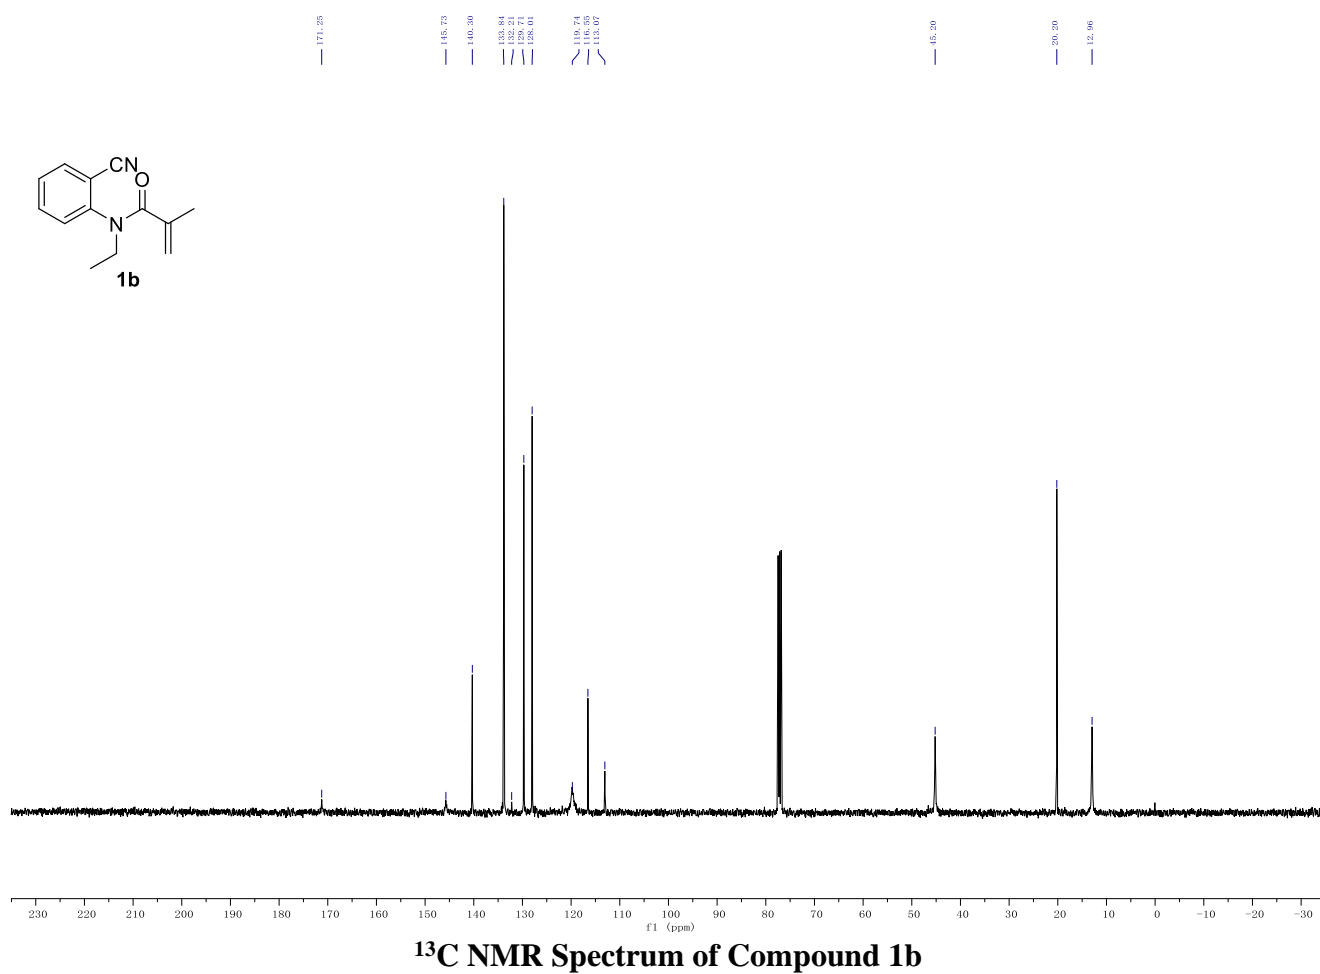



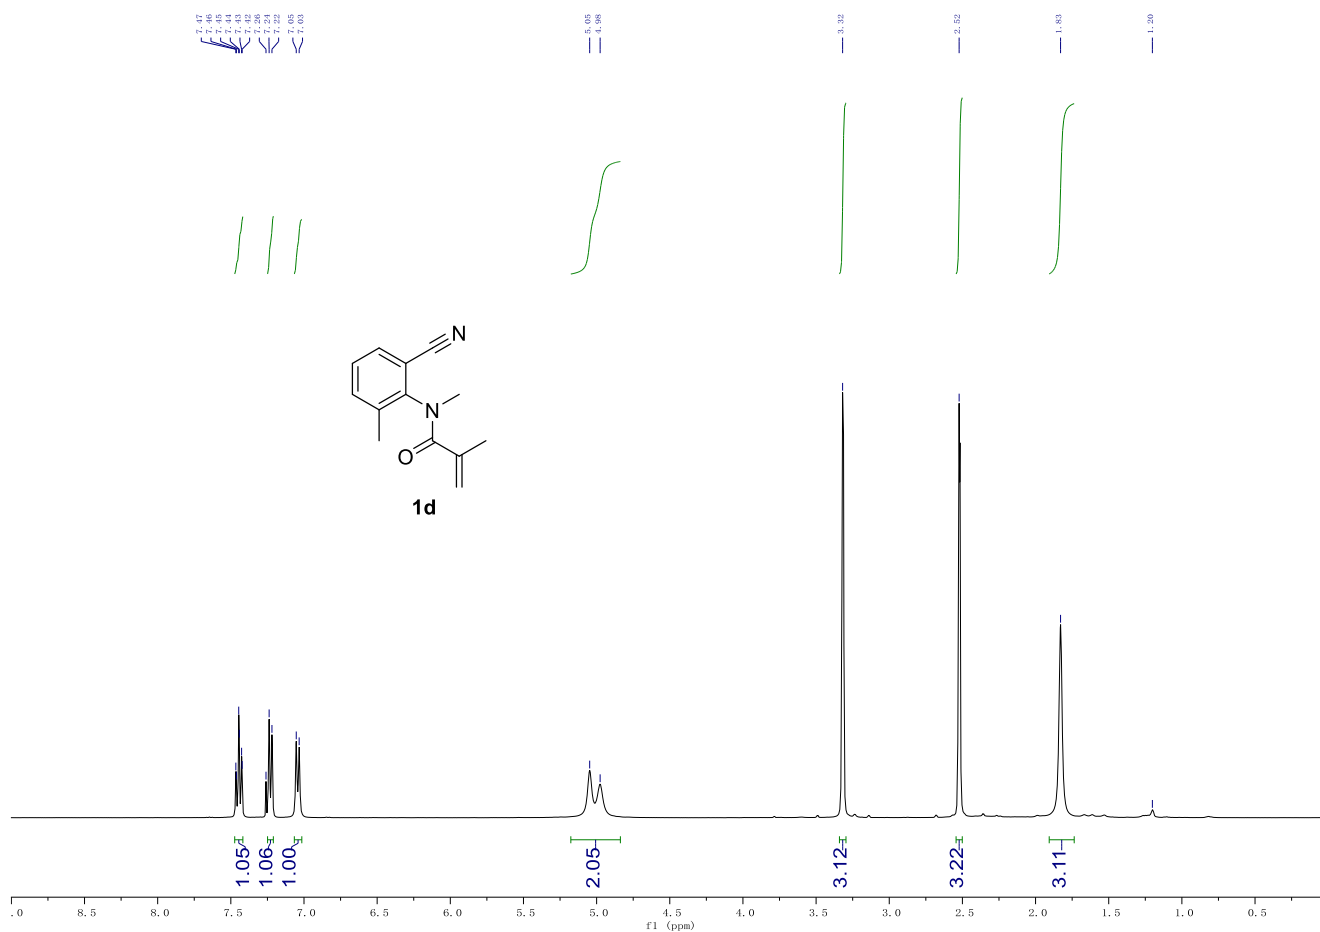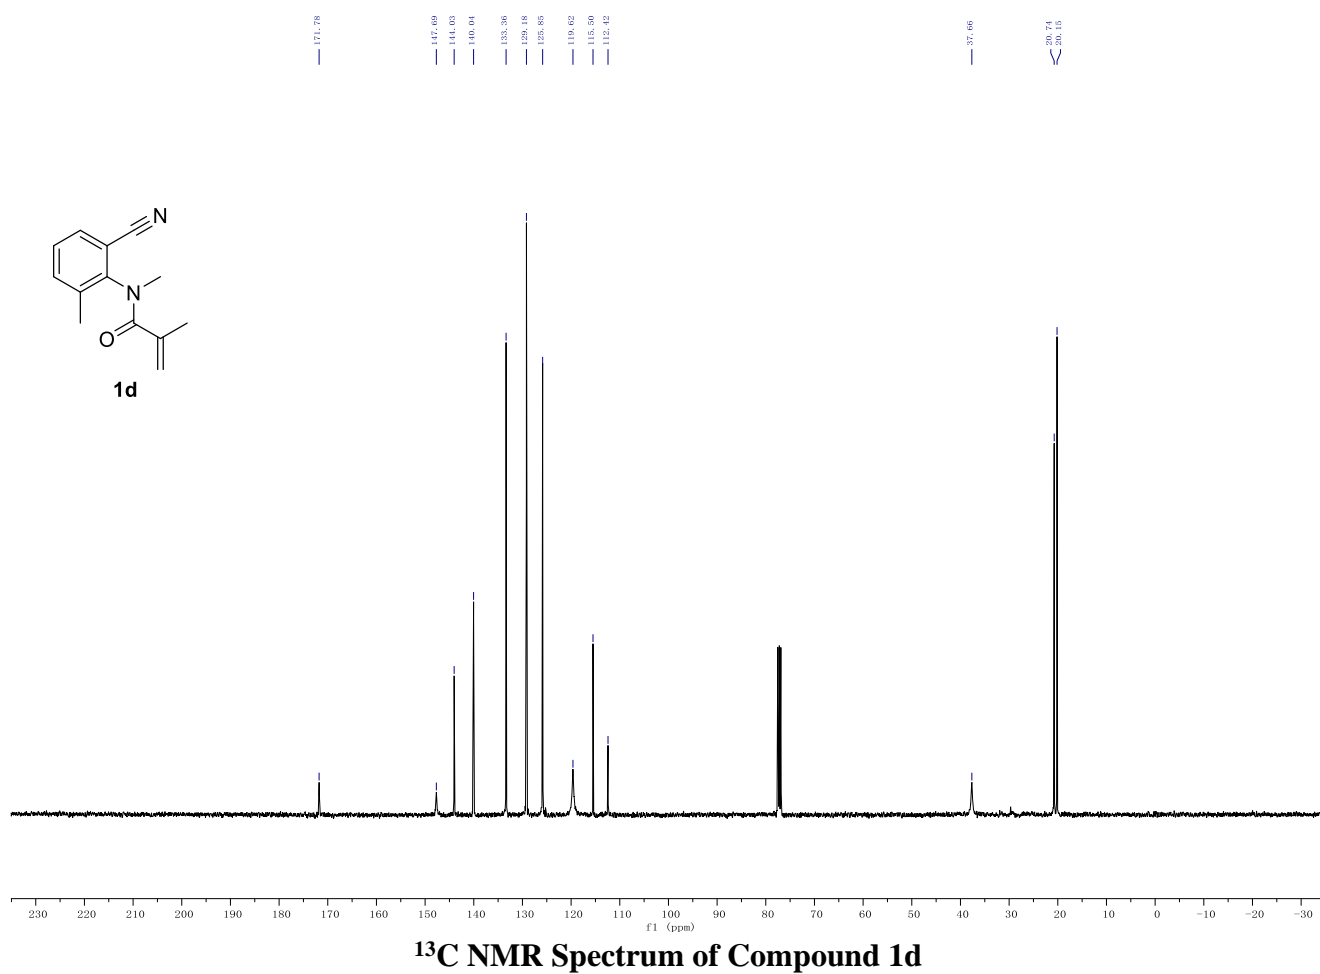

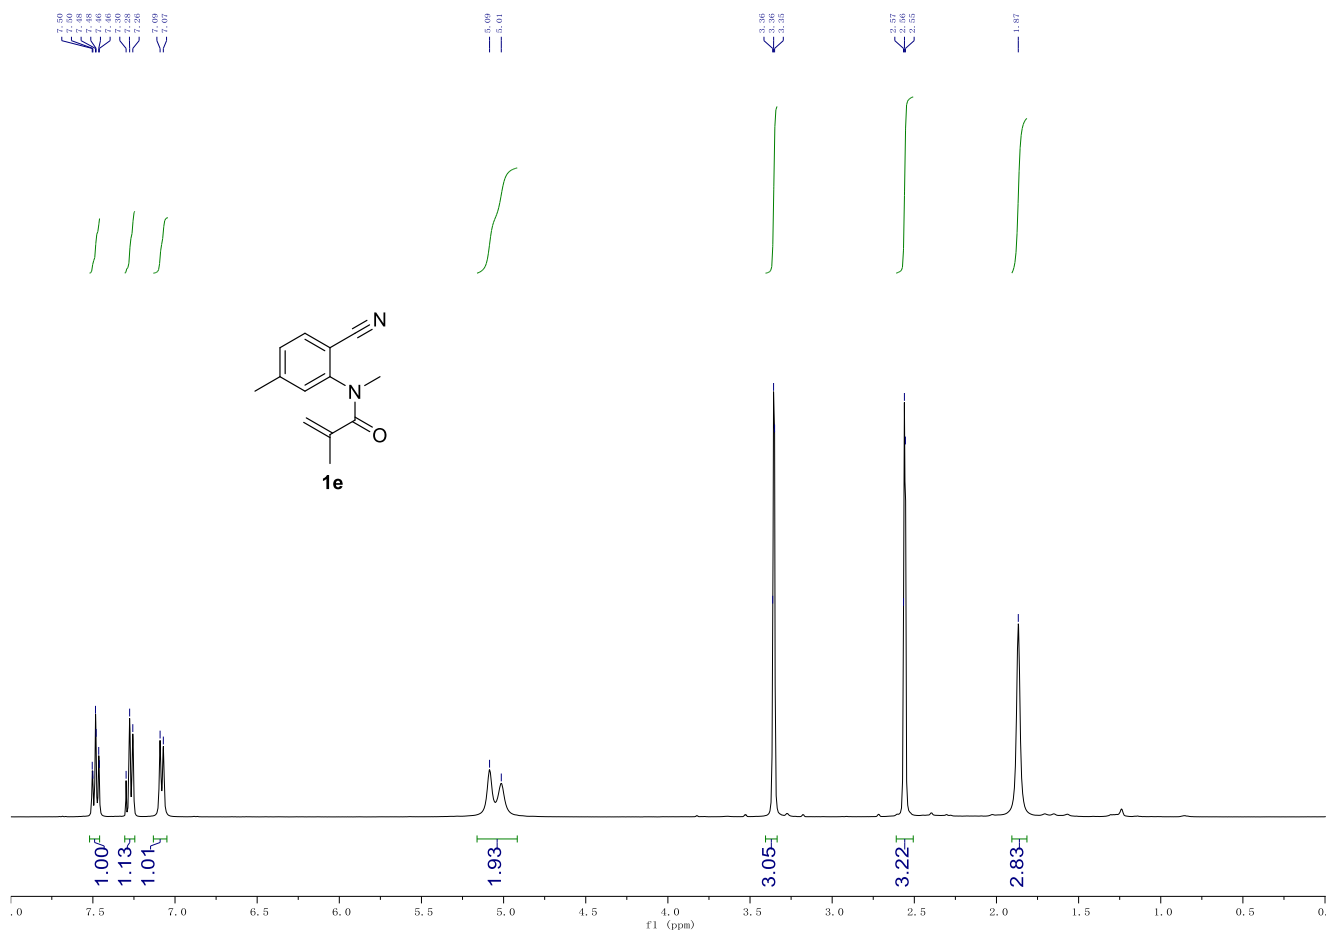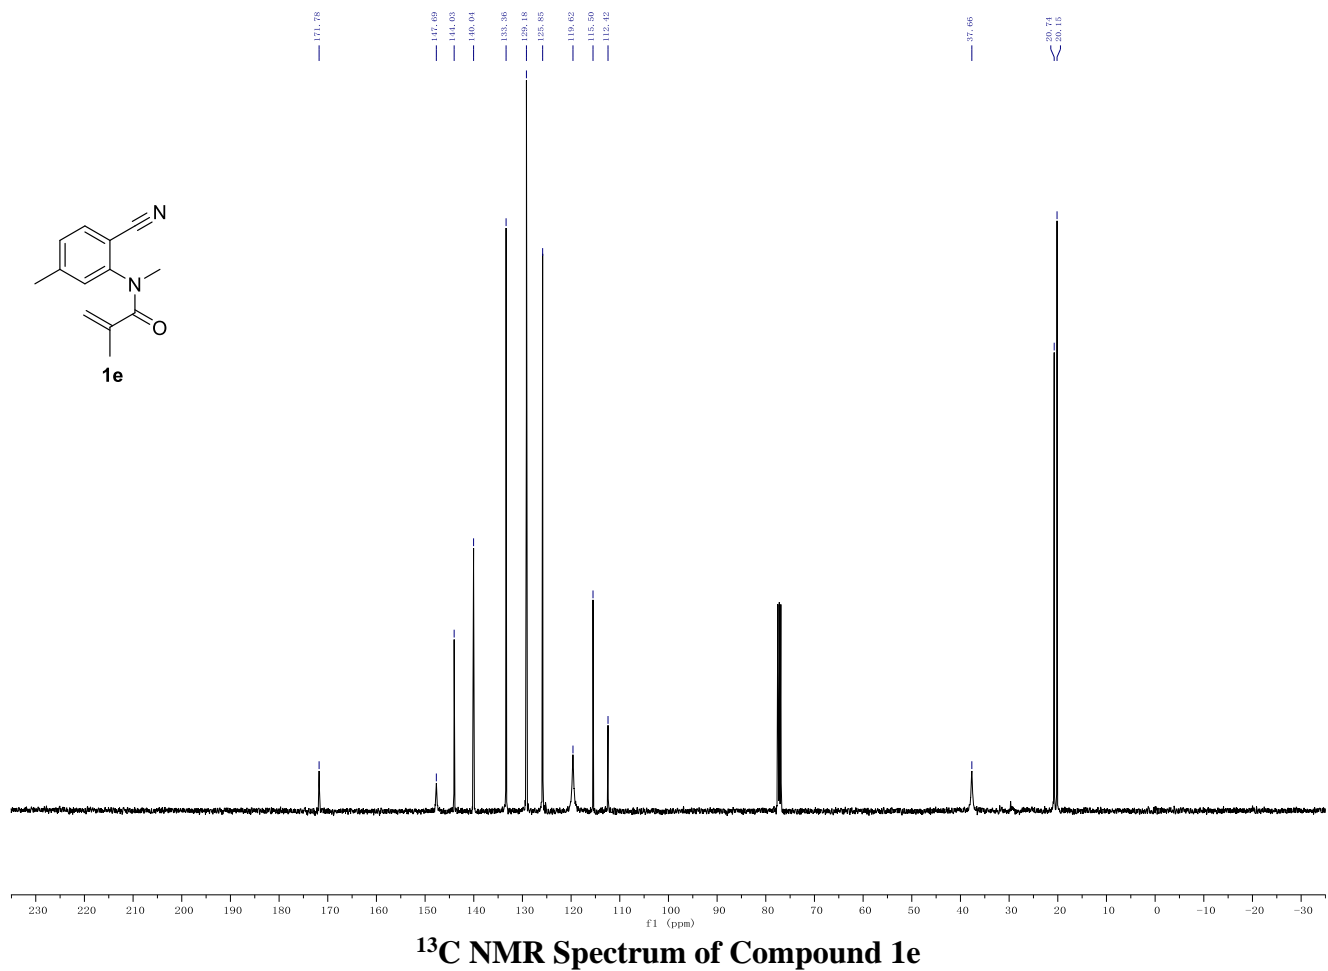

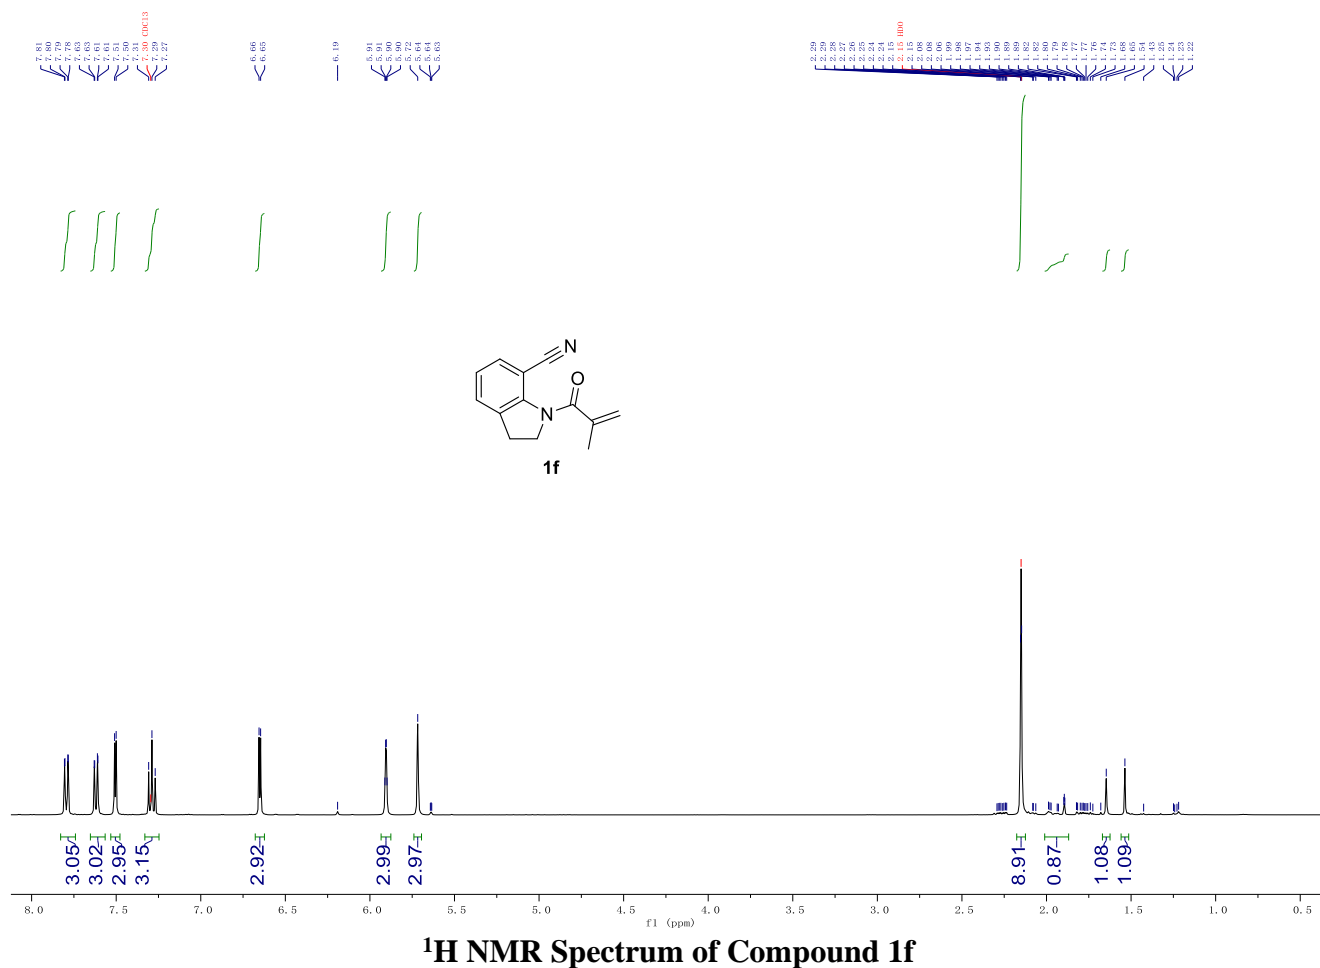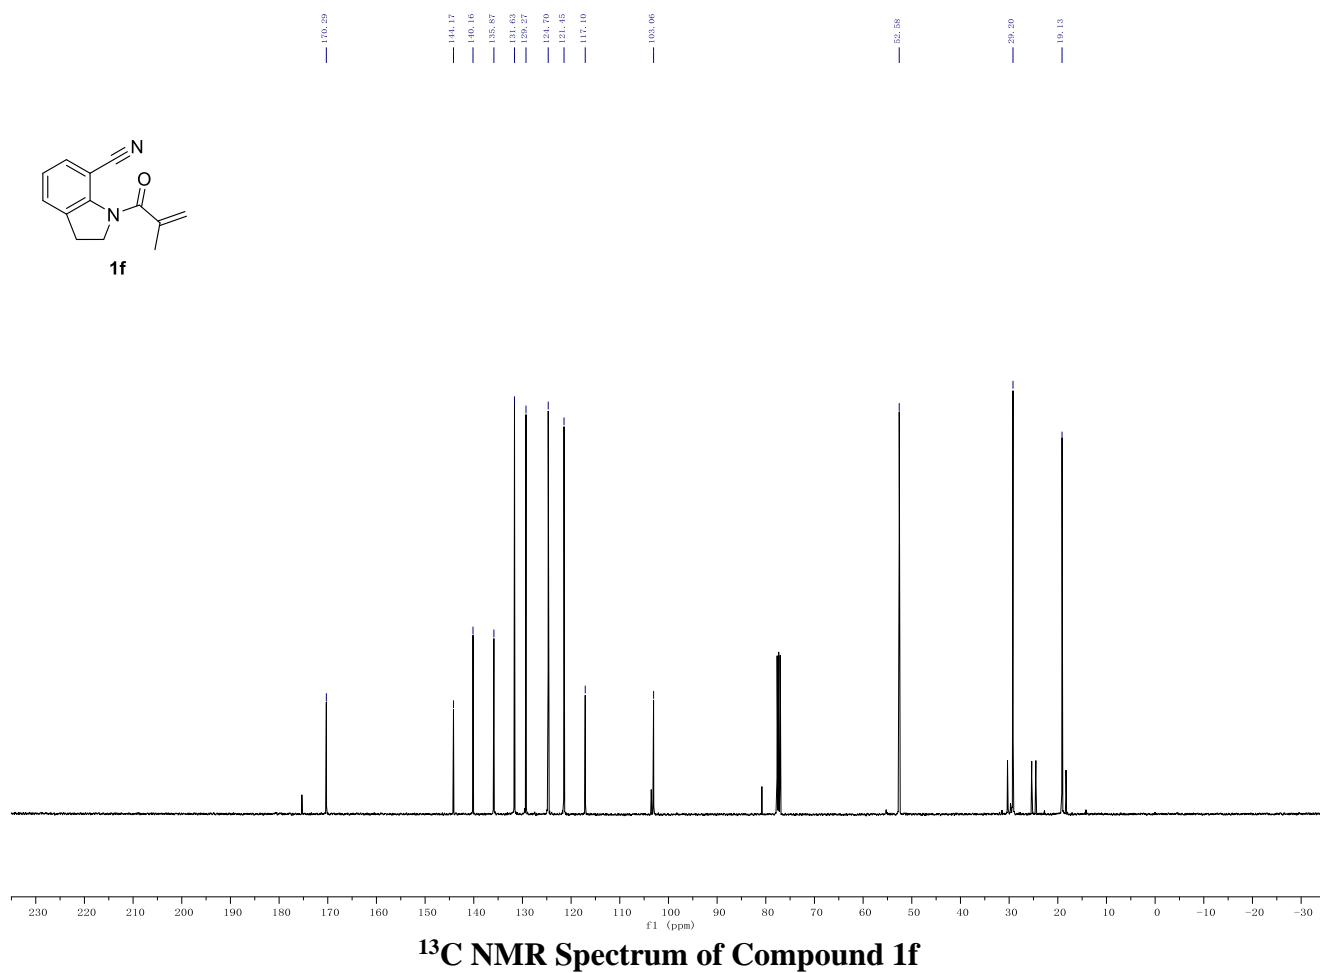

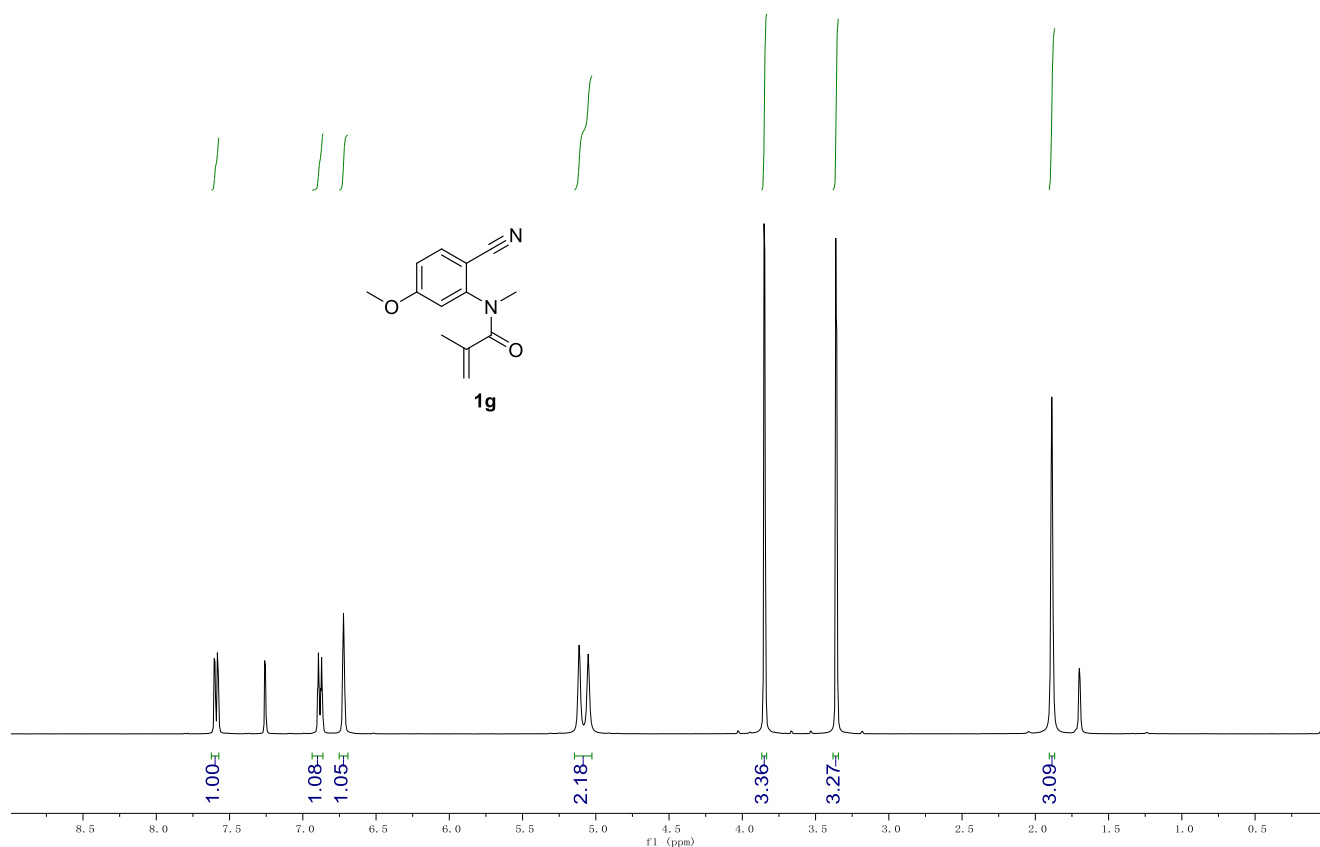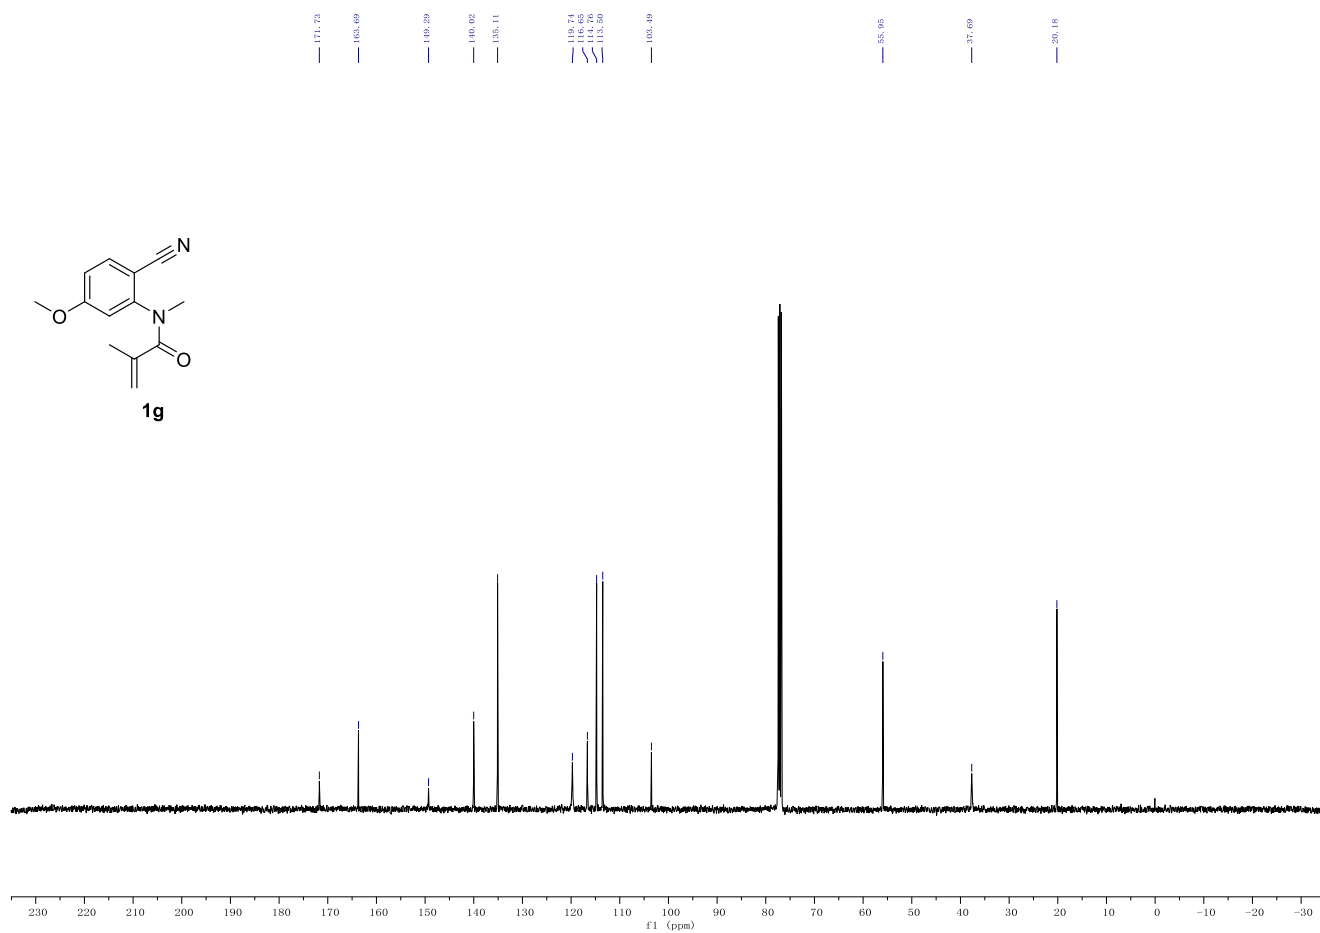

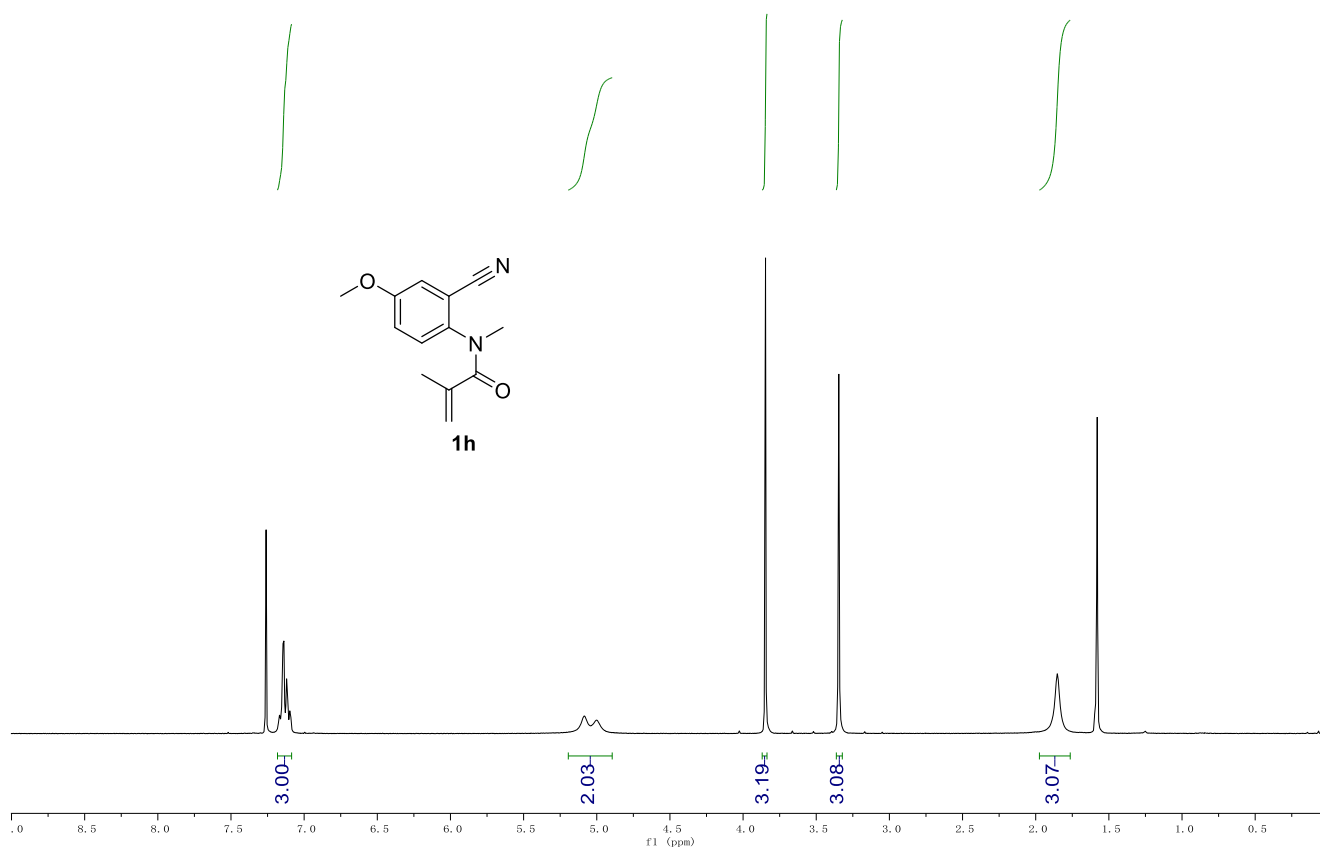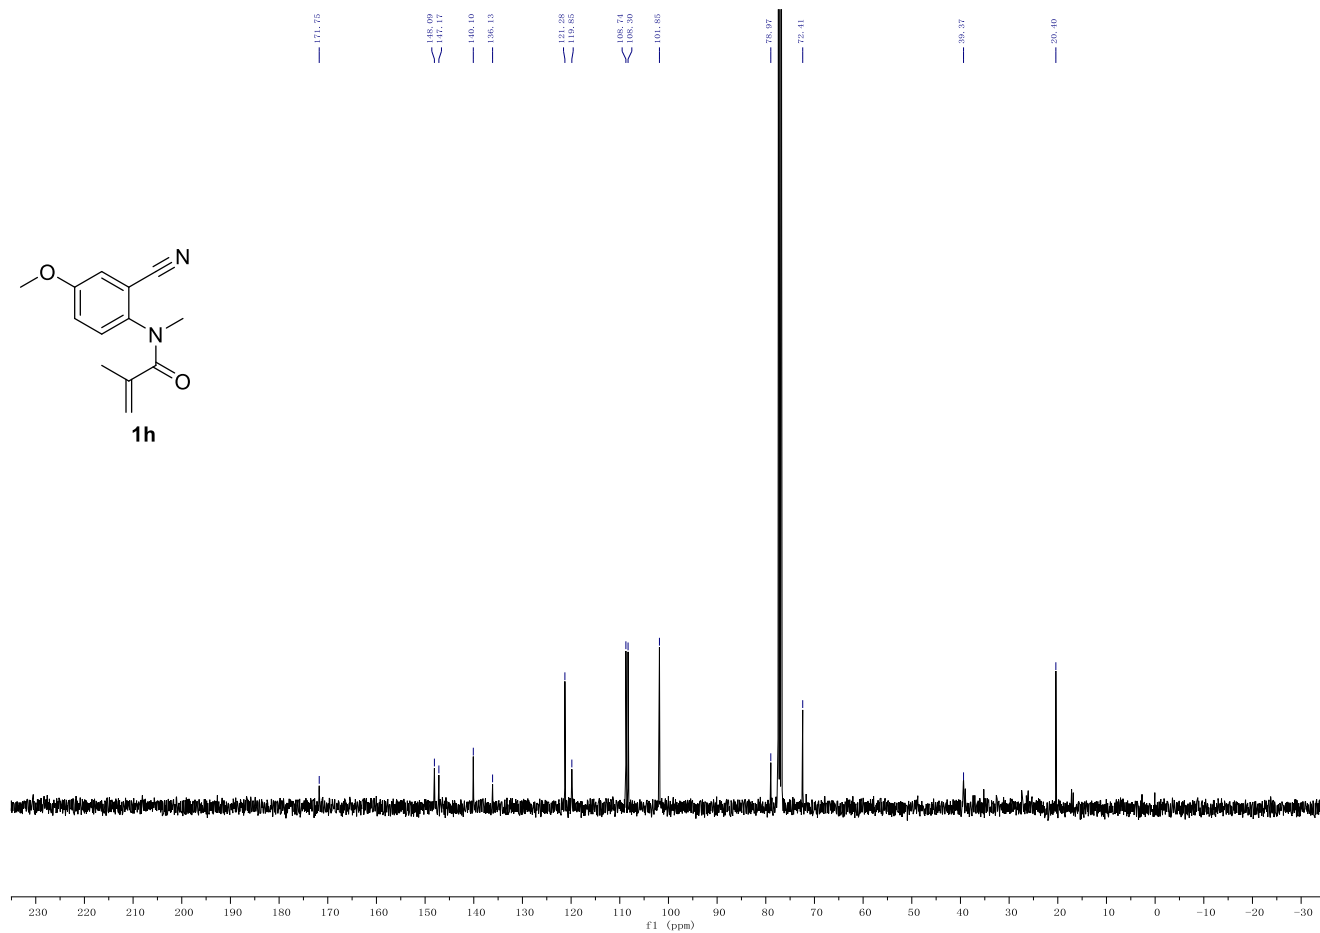

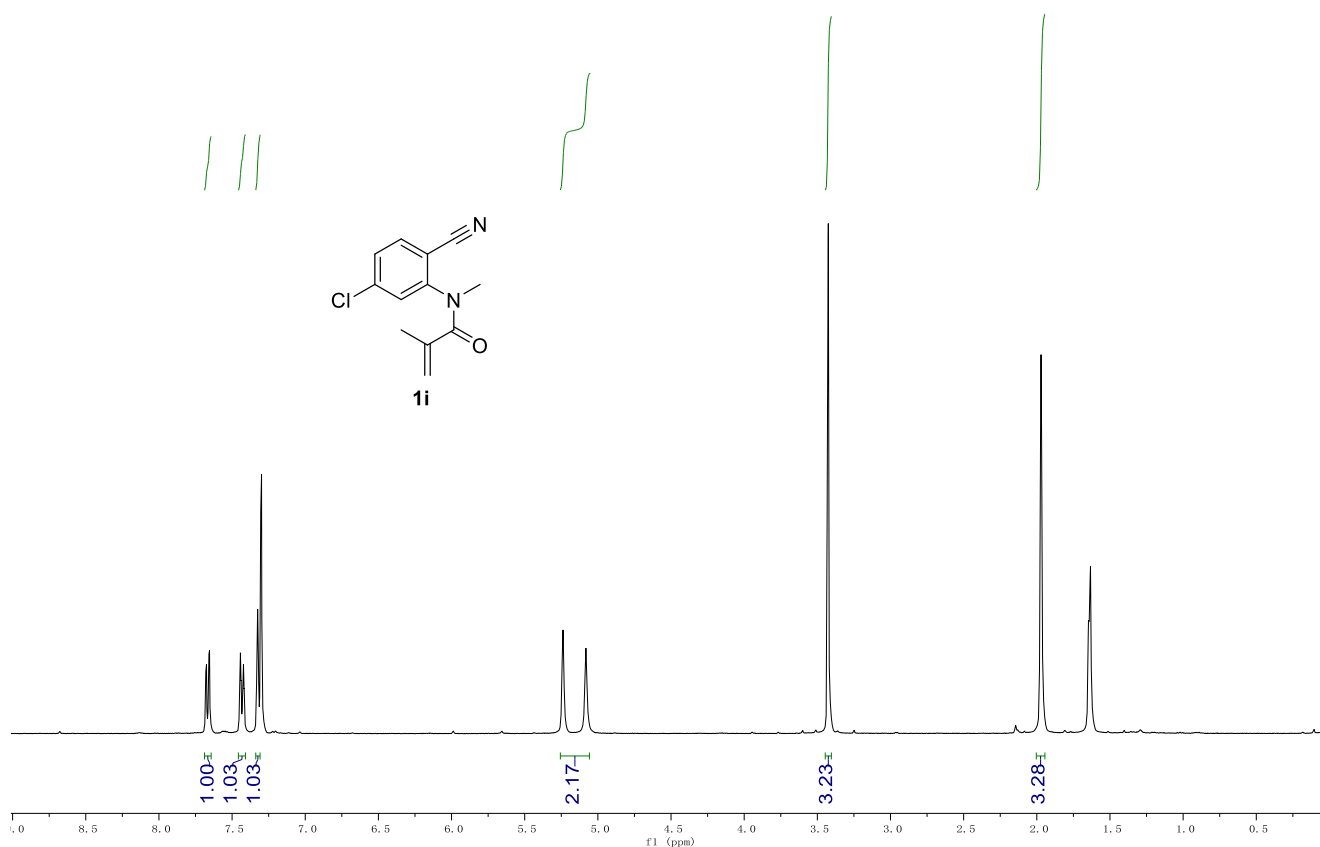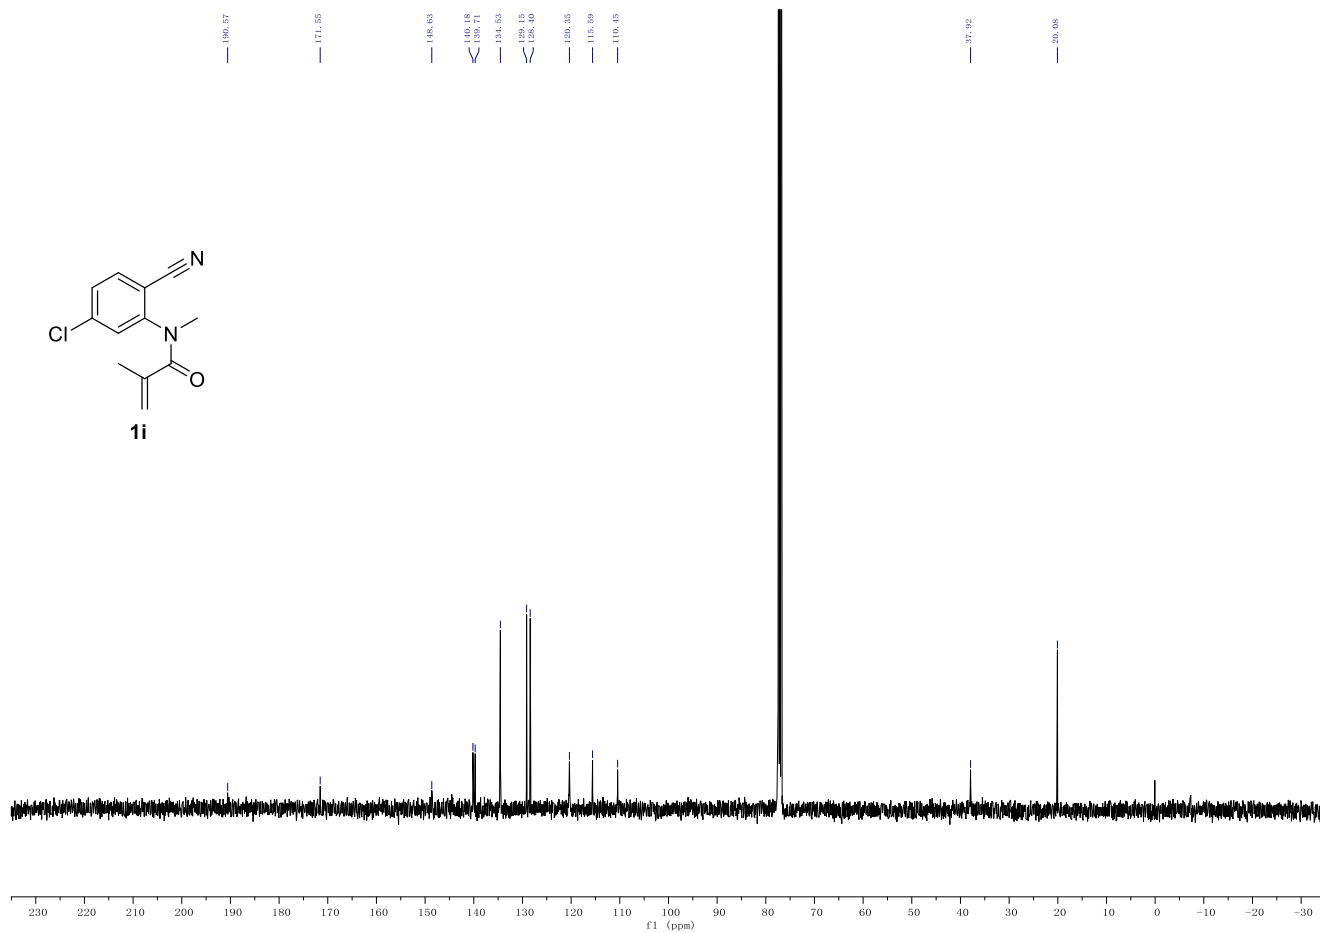

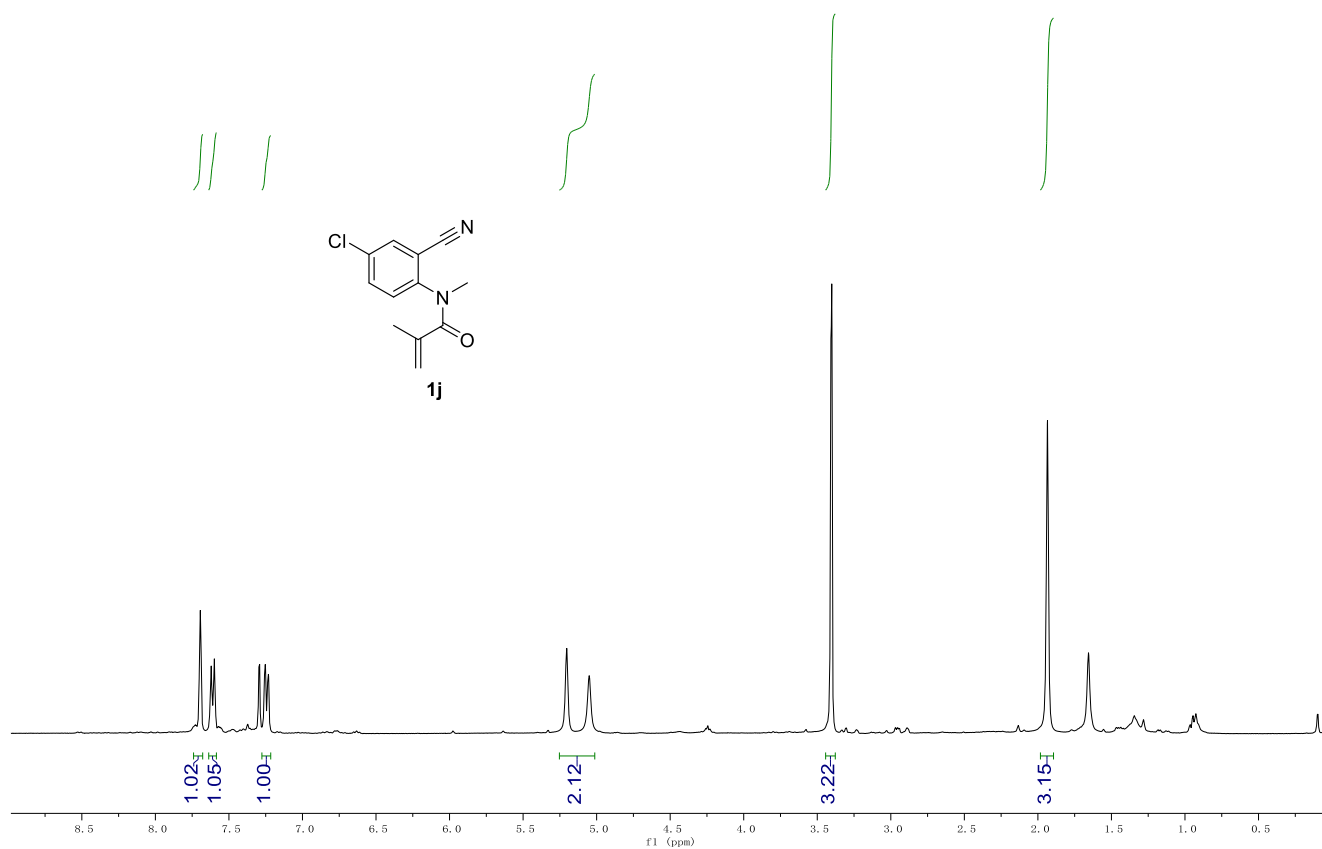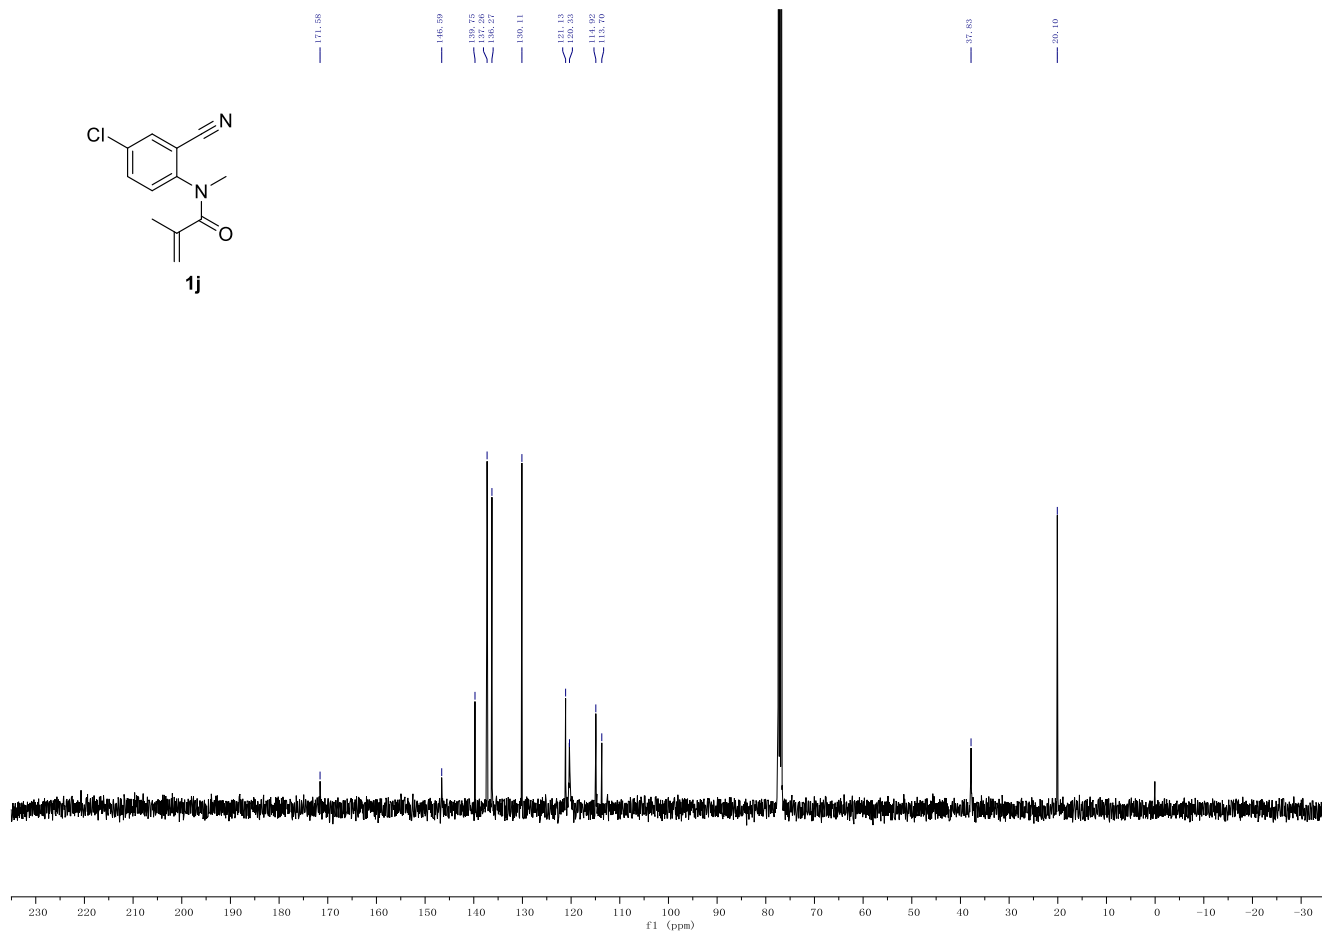



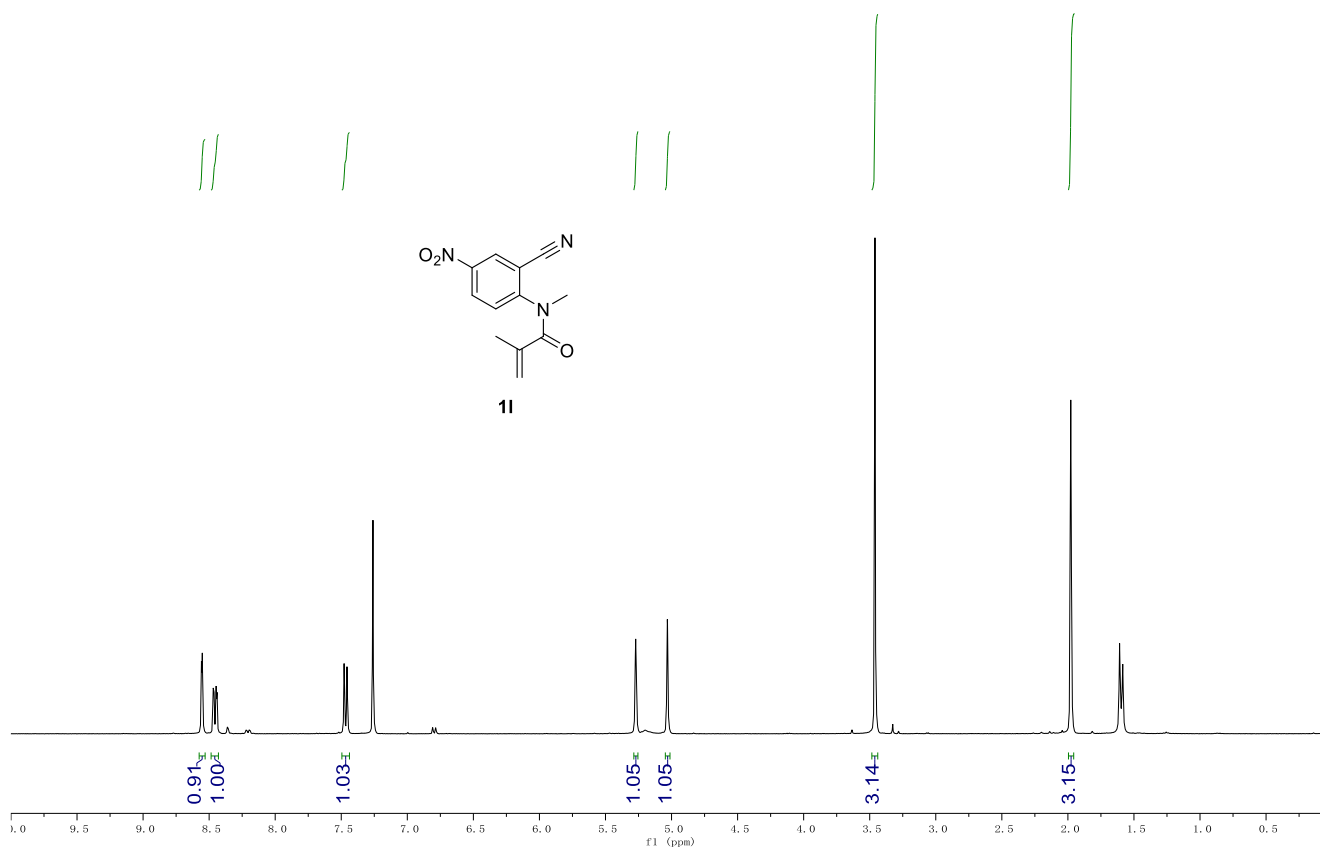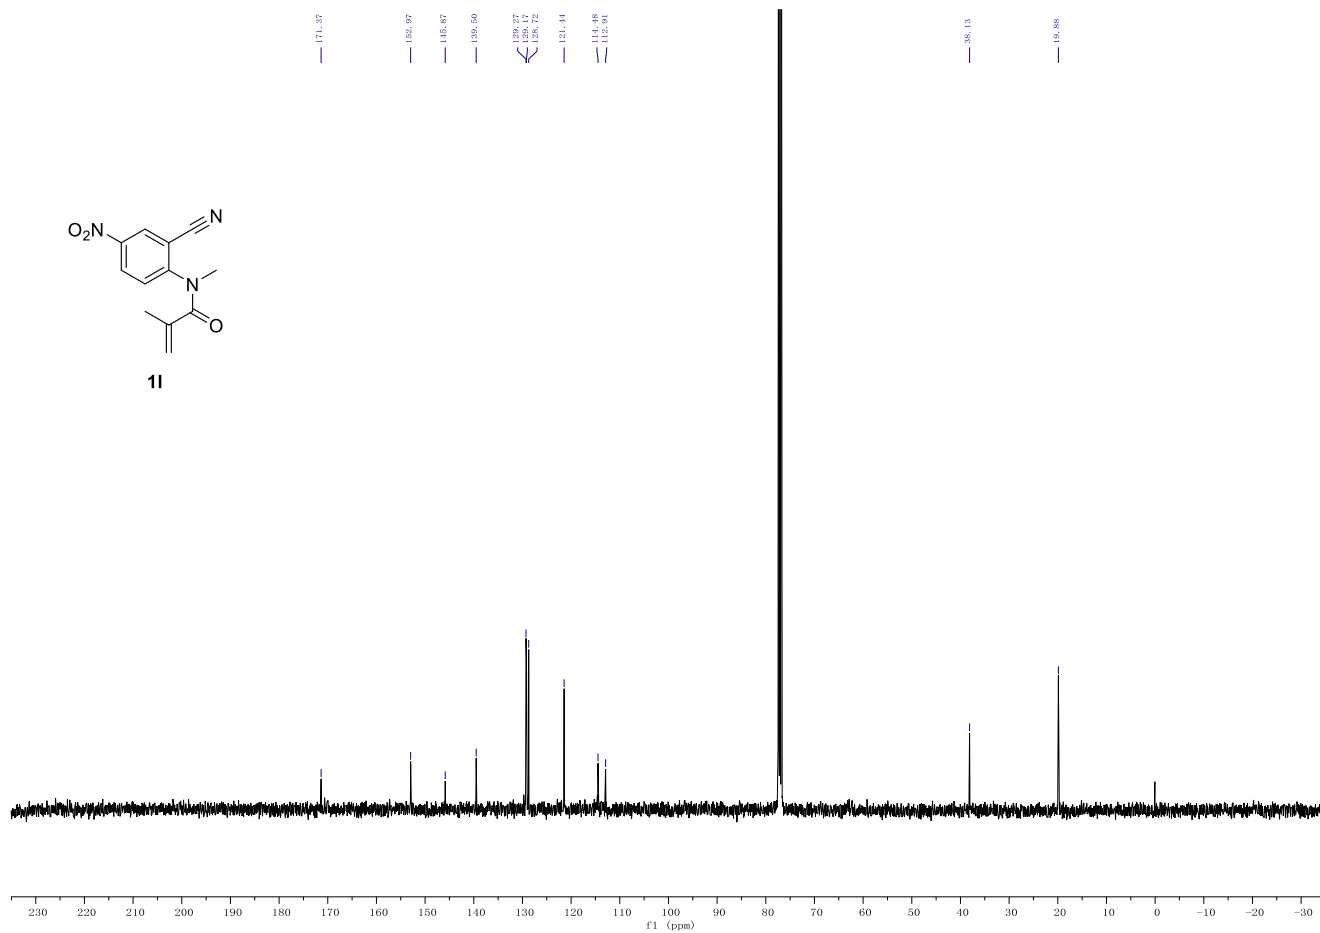

## 9 Copies of $^1\text{H}$ , $^{13}\text{C}$ and $^{19}\text{F}$ NMR Spectra for Products

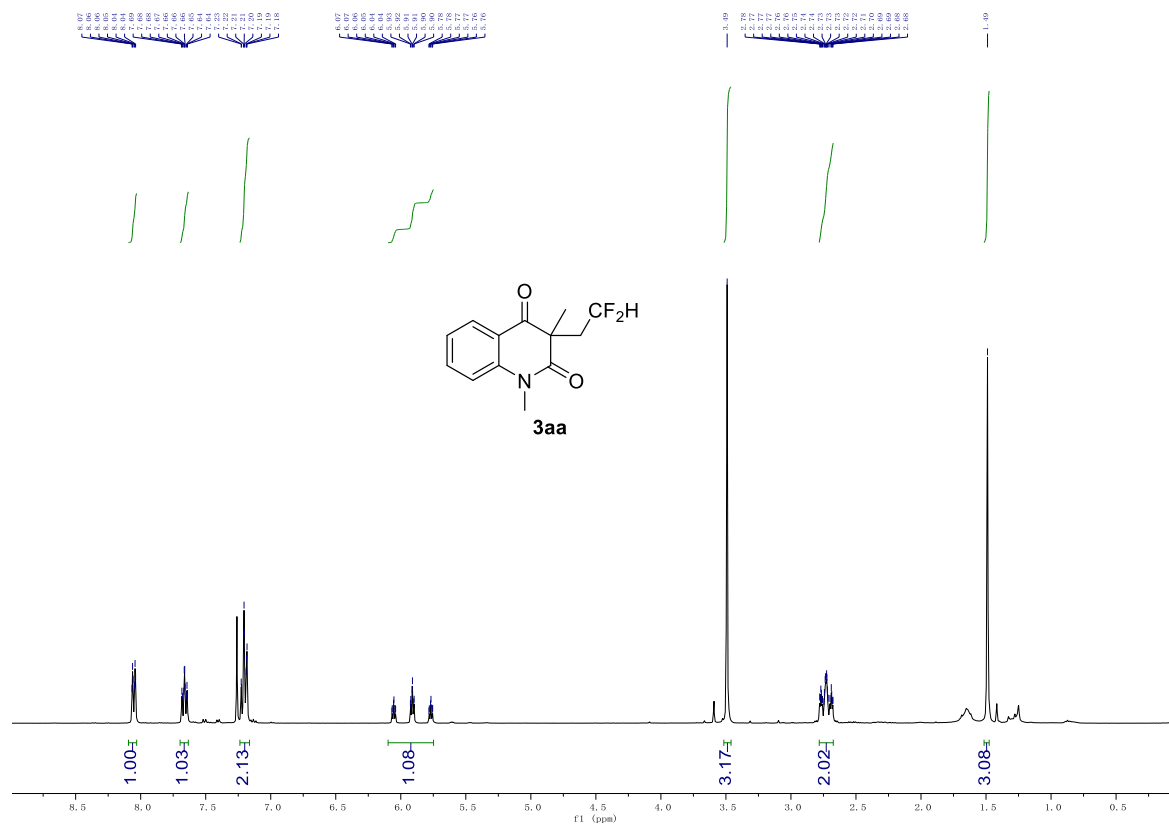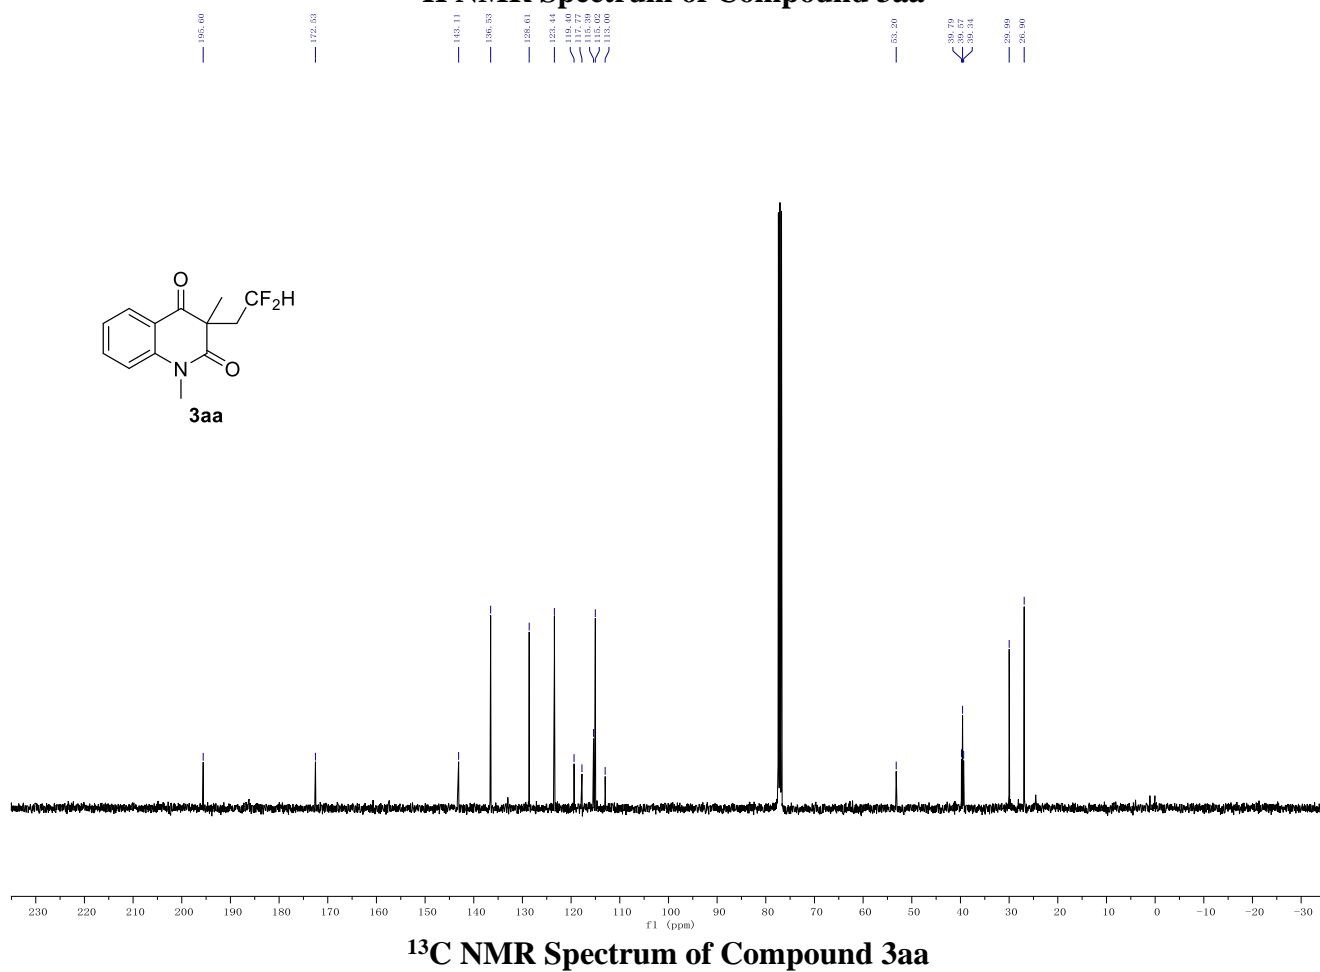

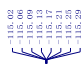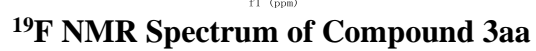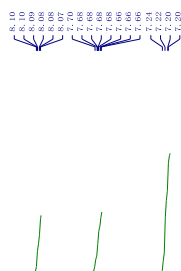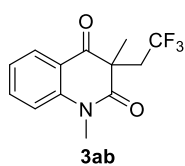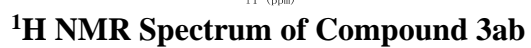

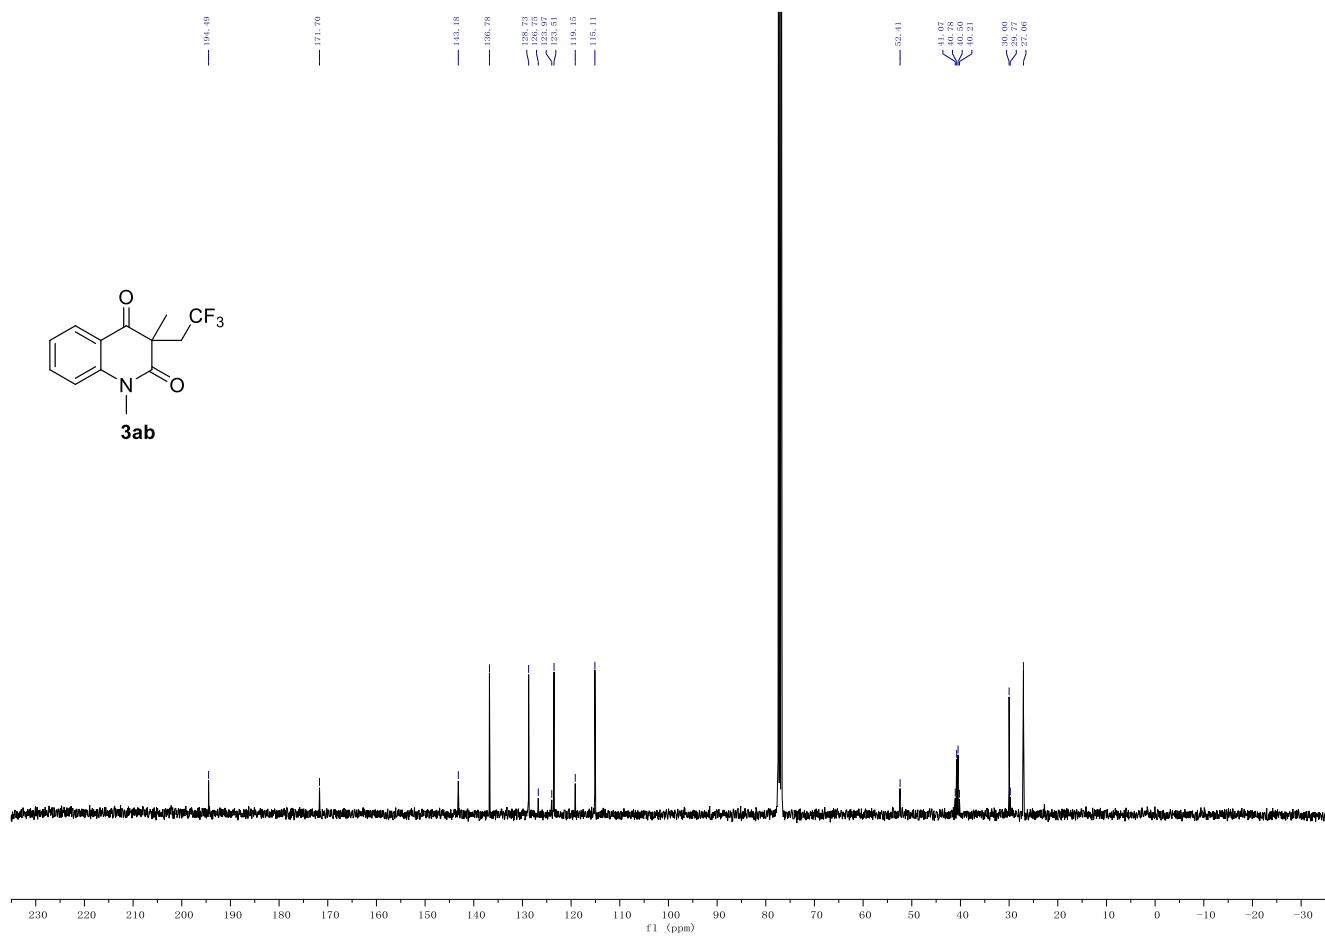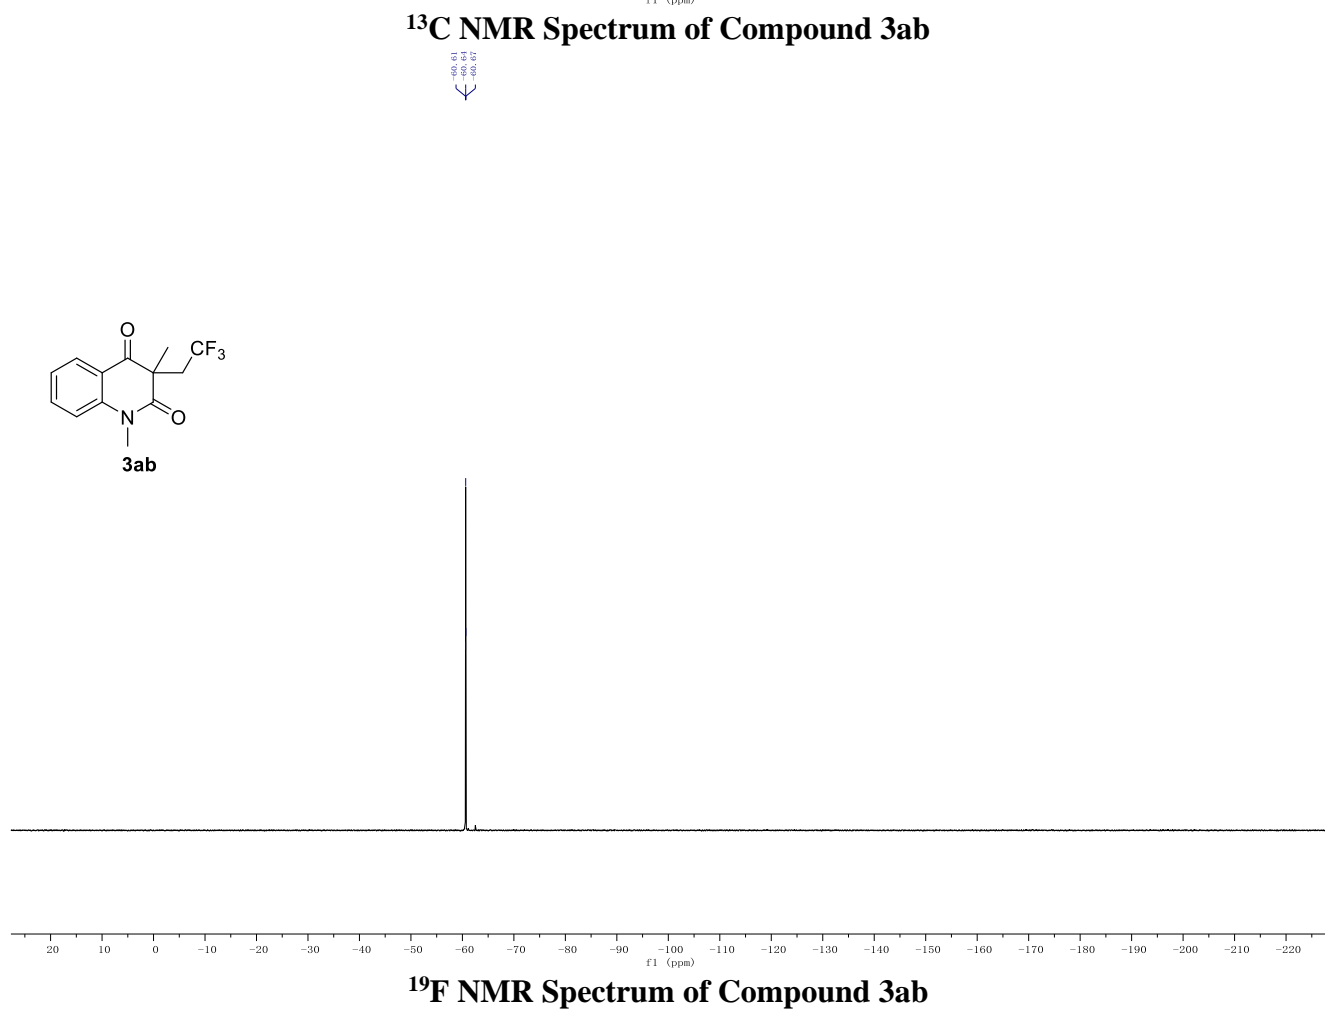

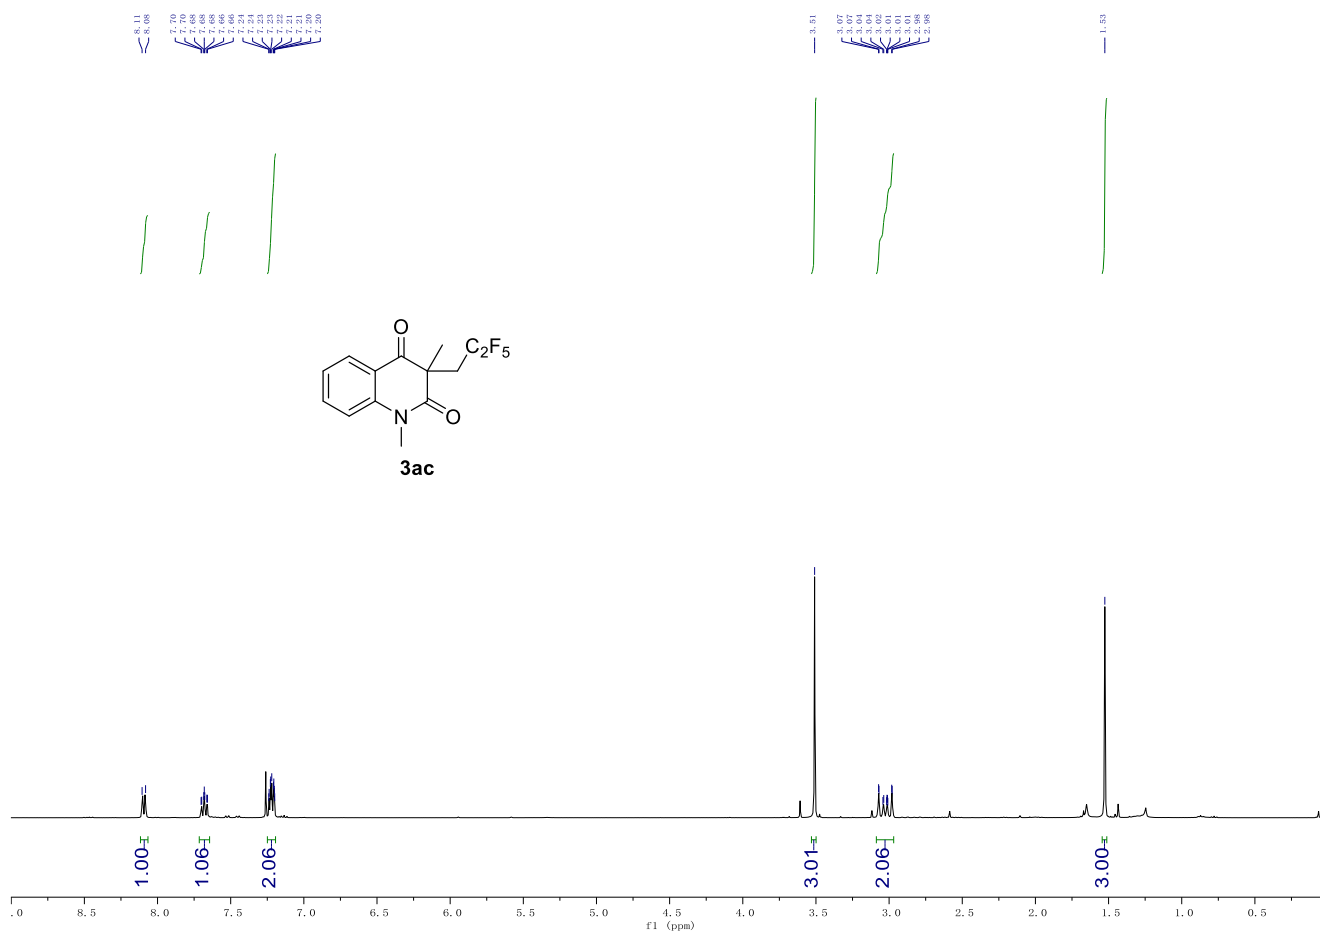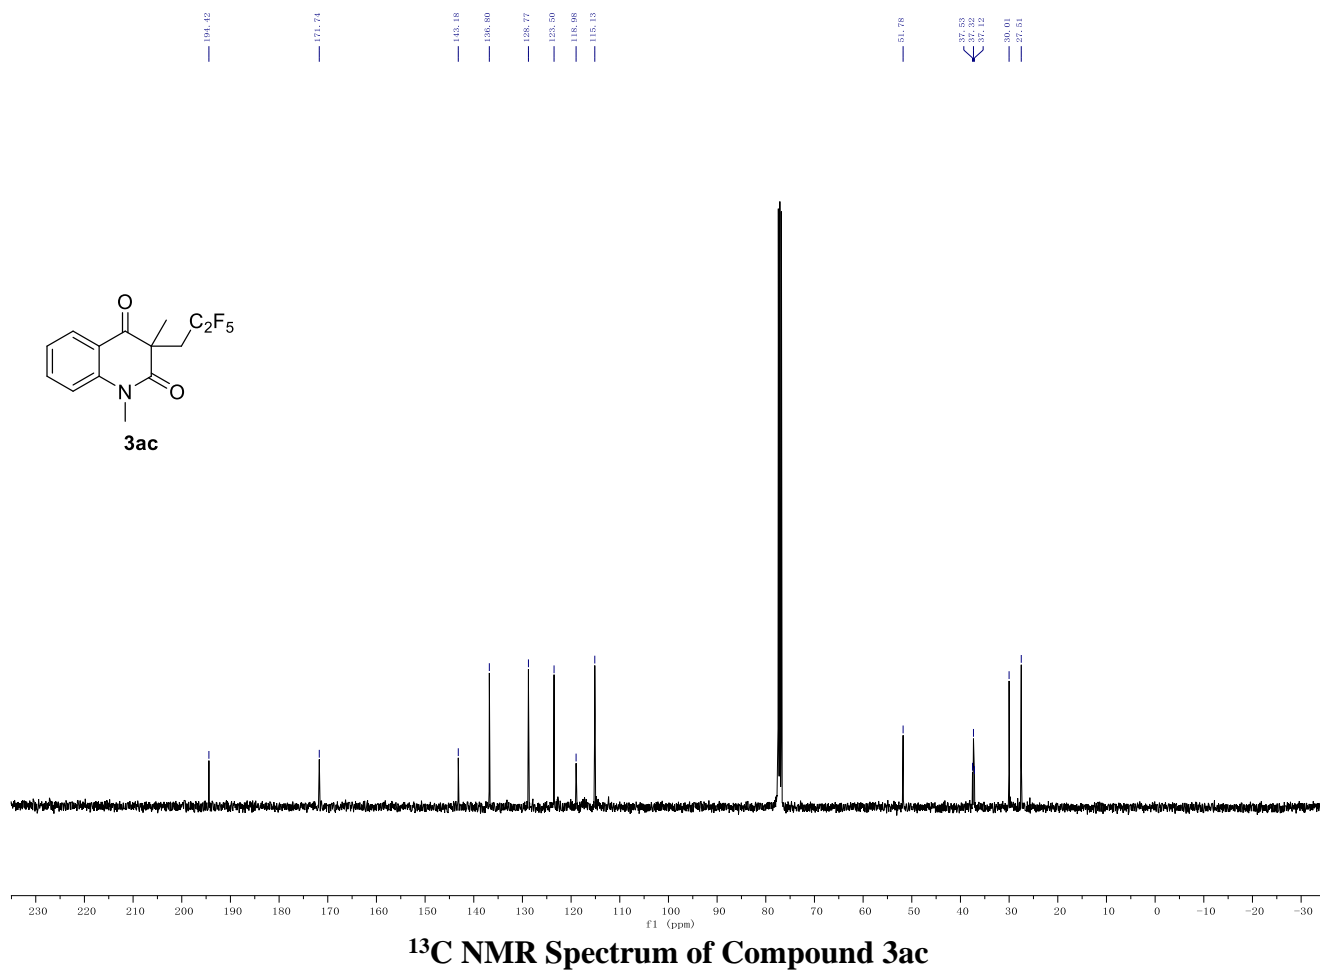

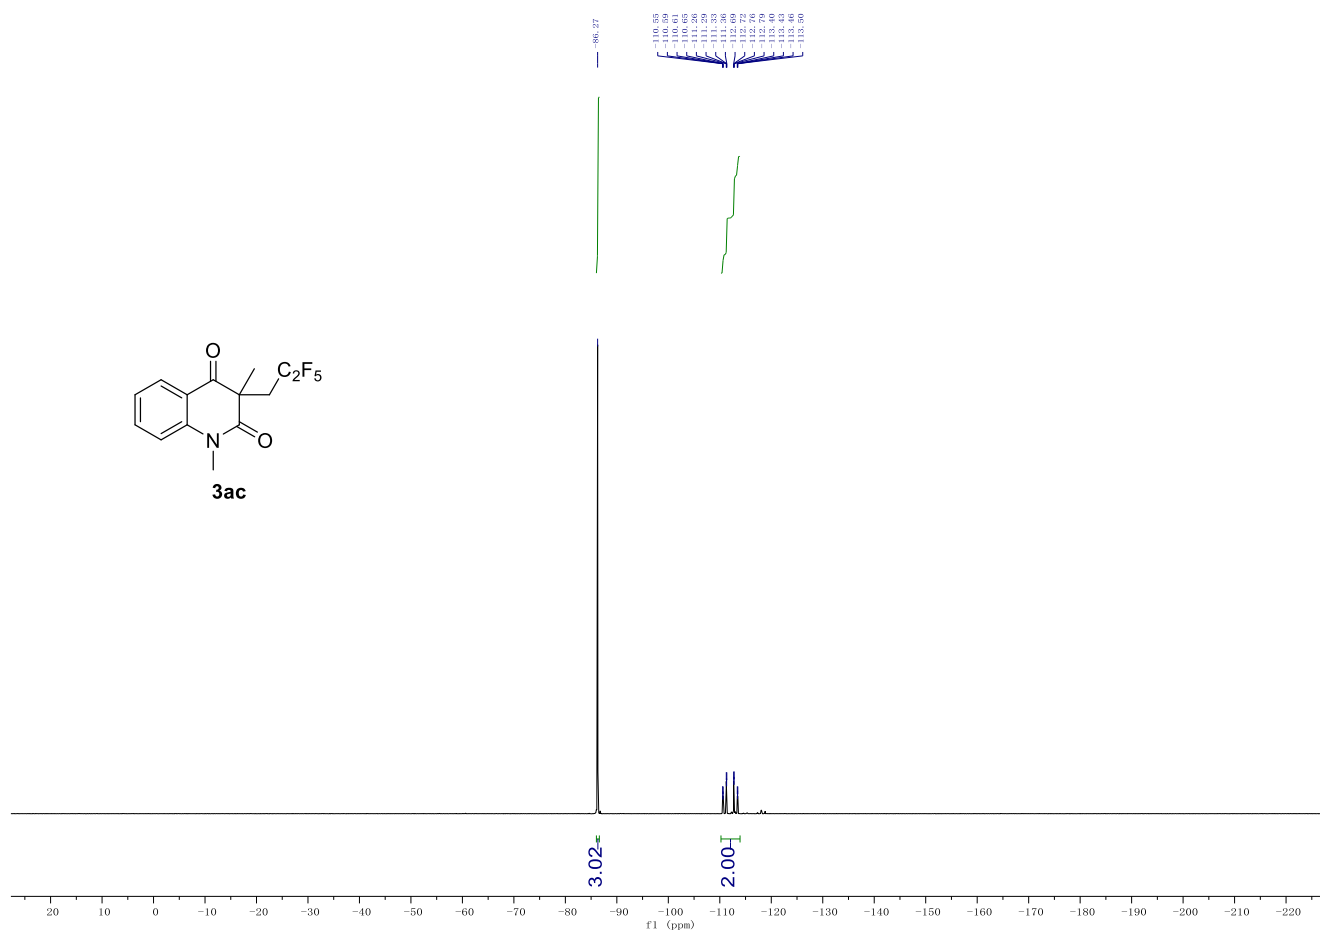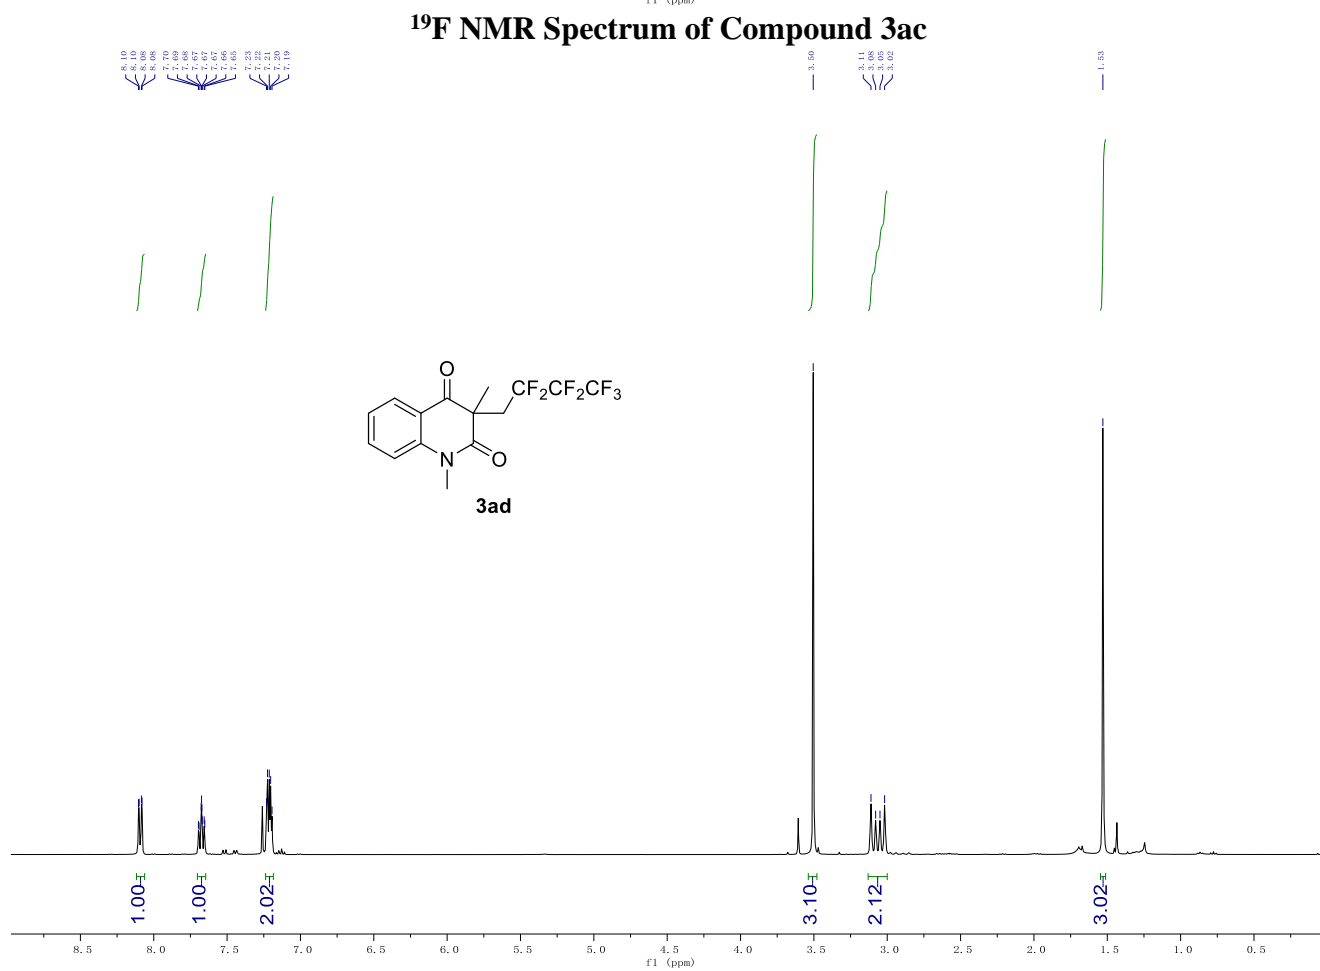

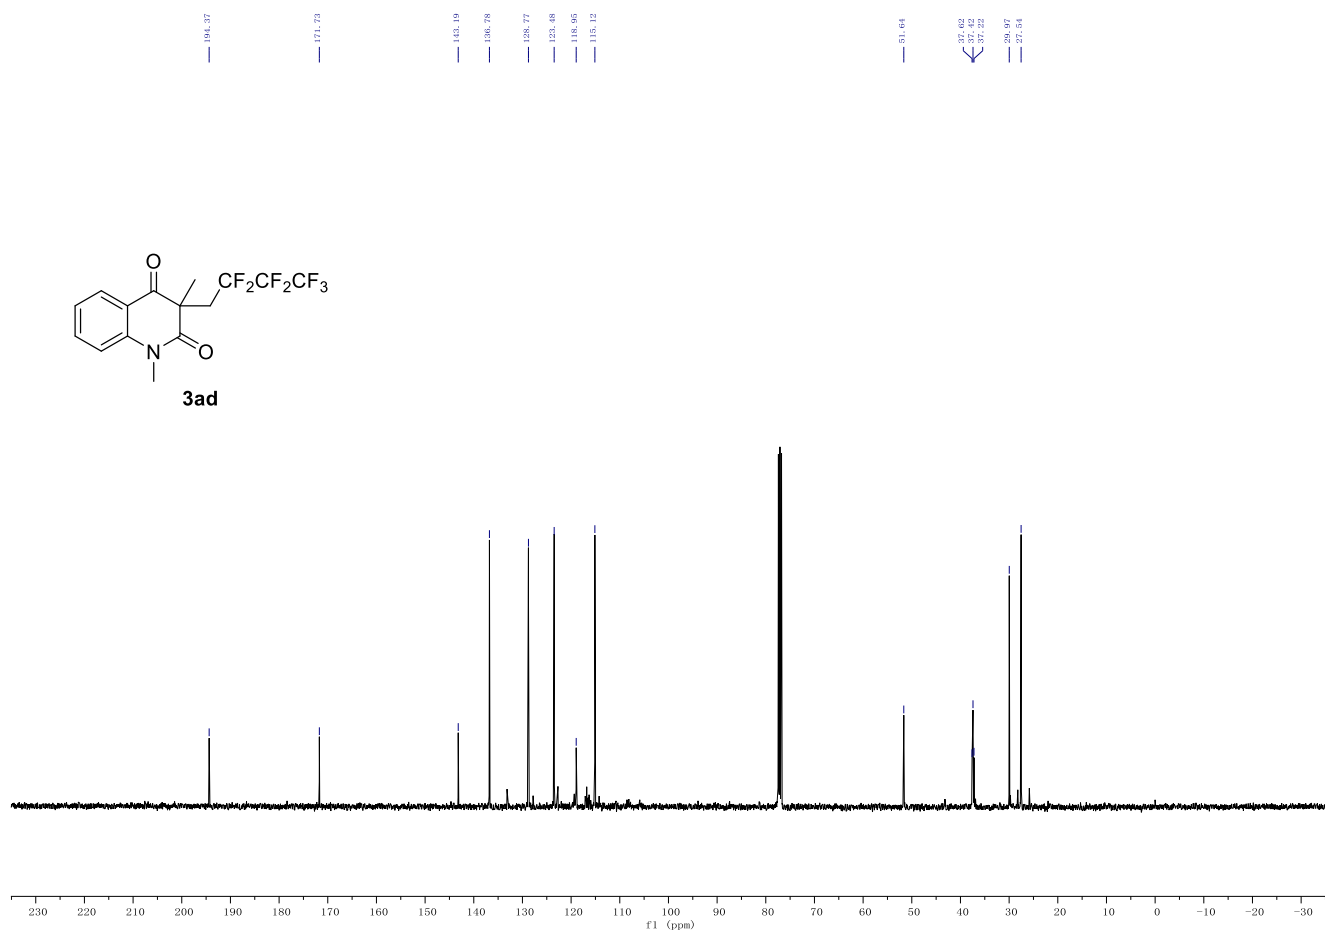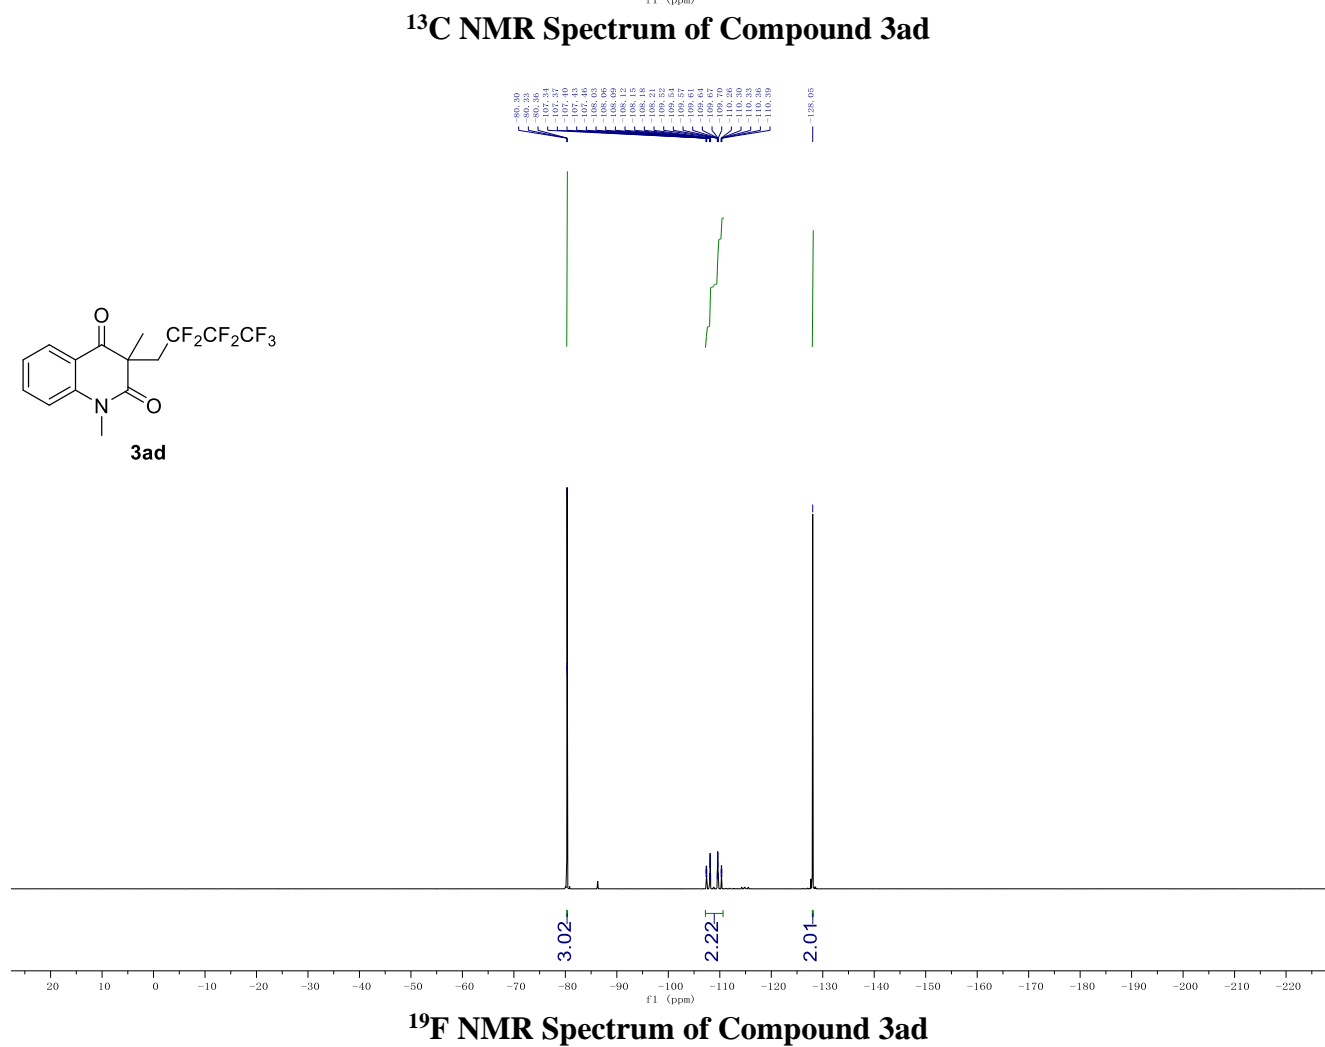

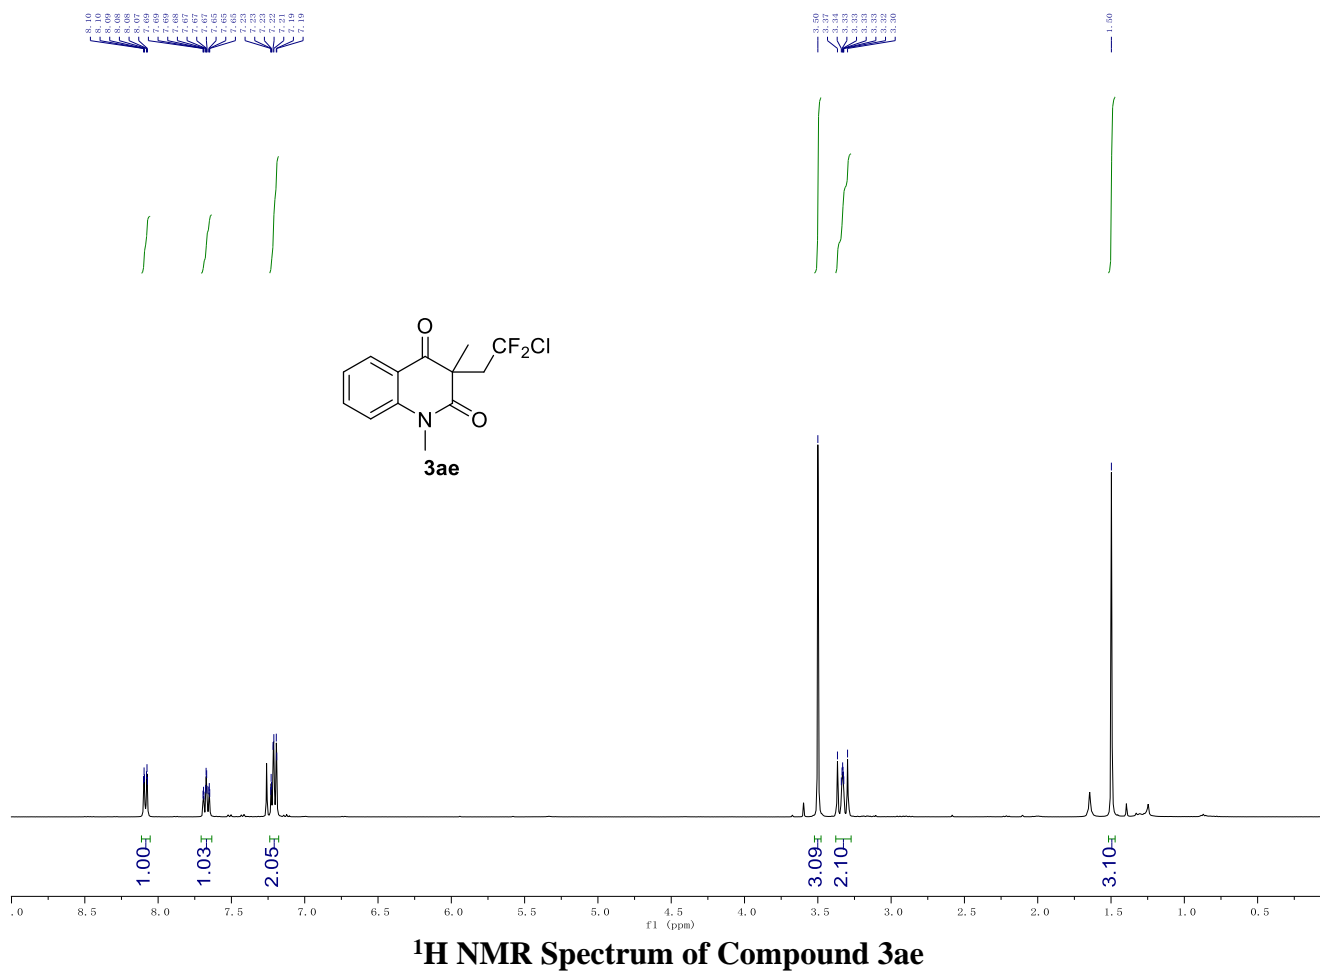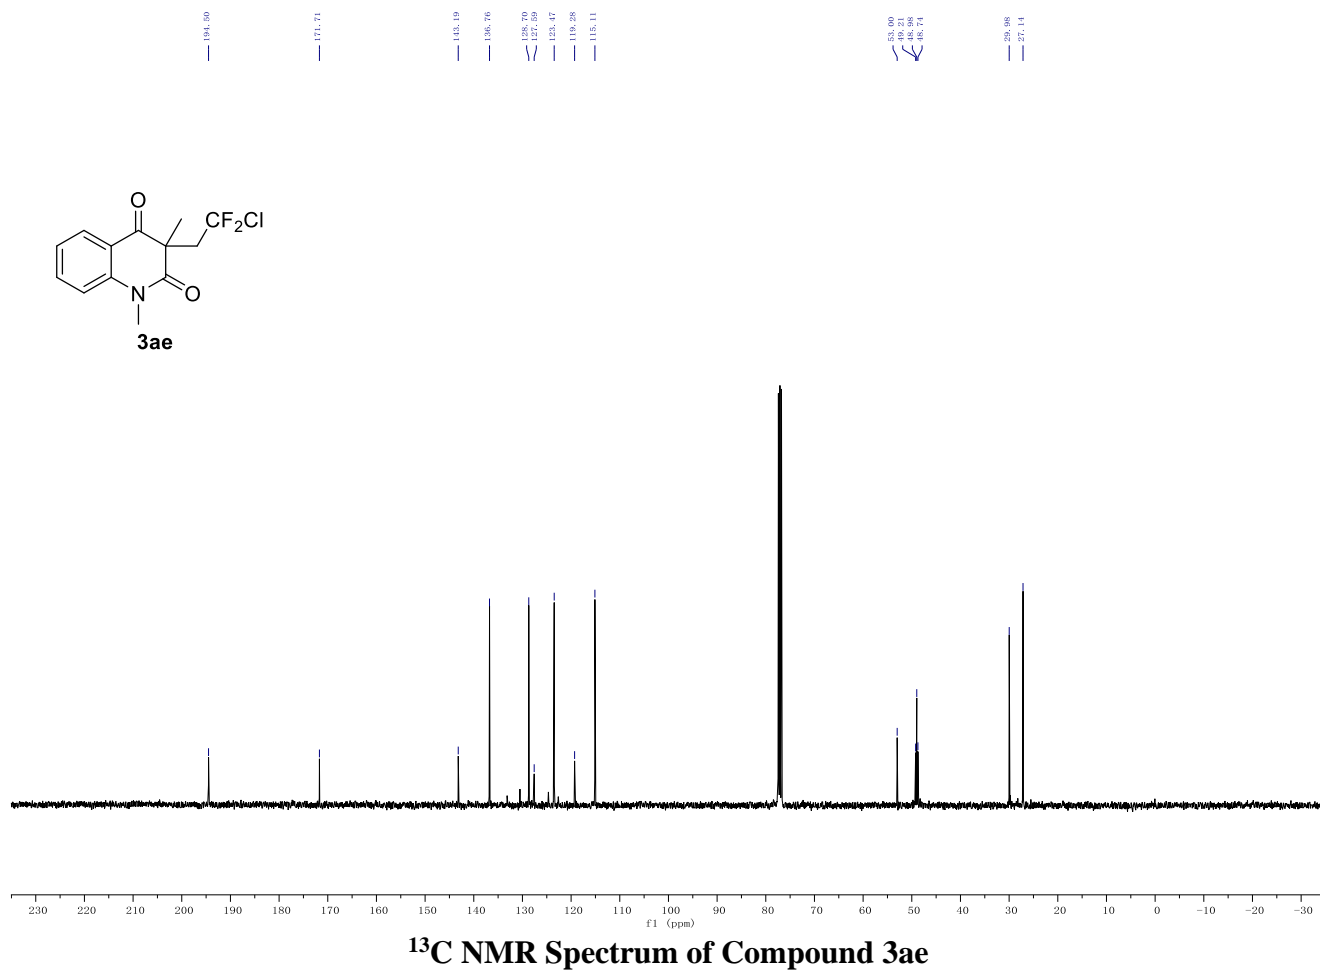

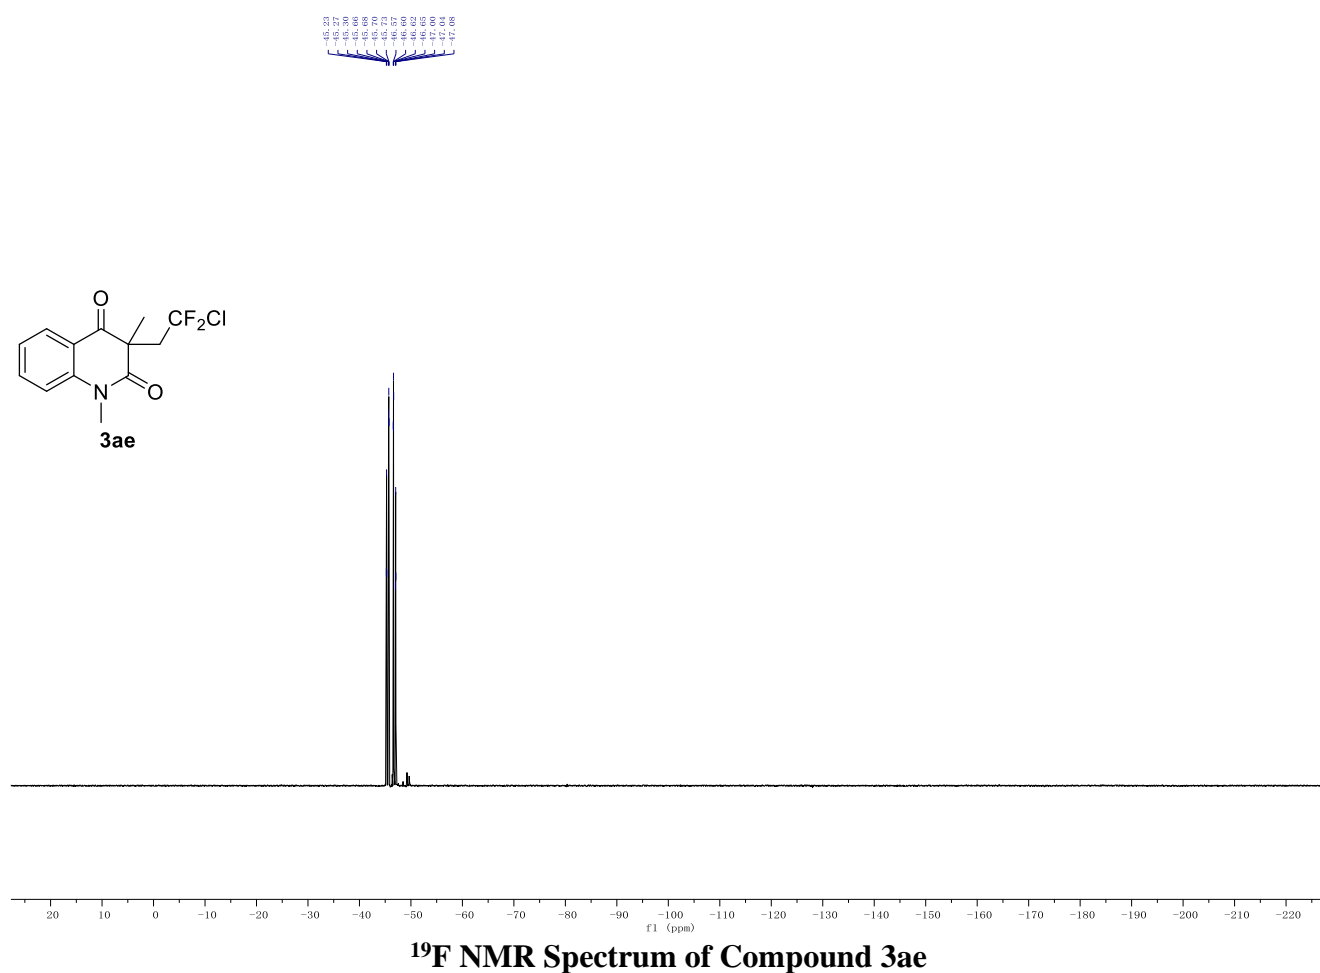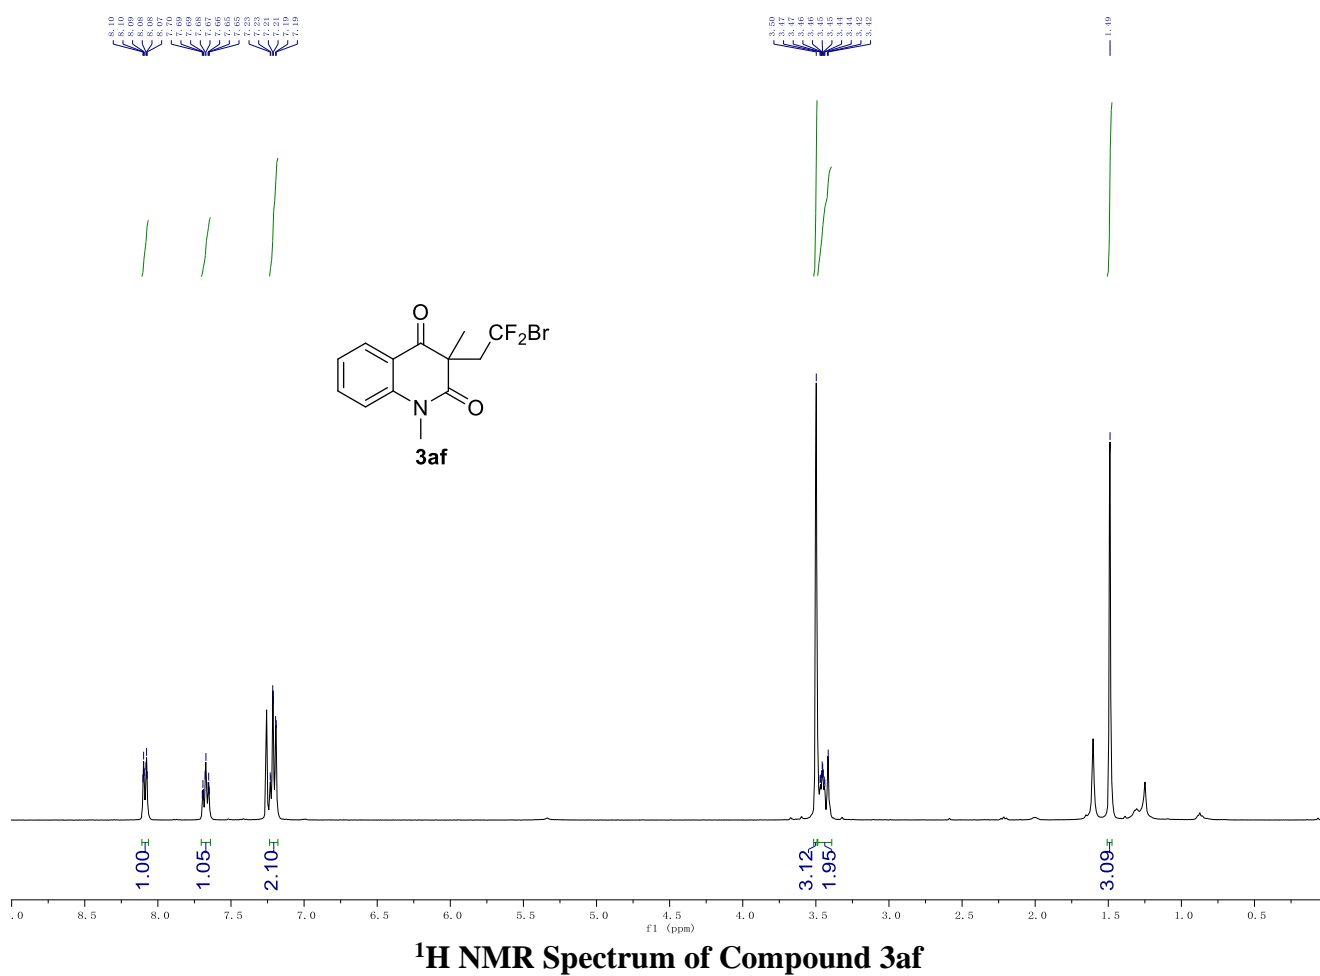

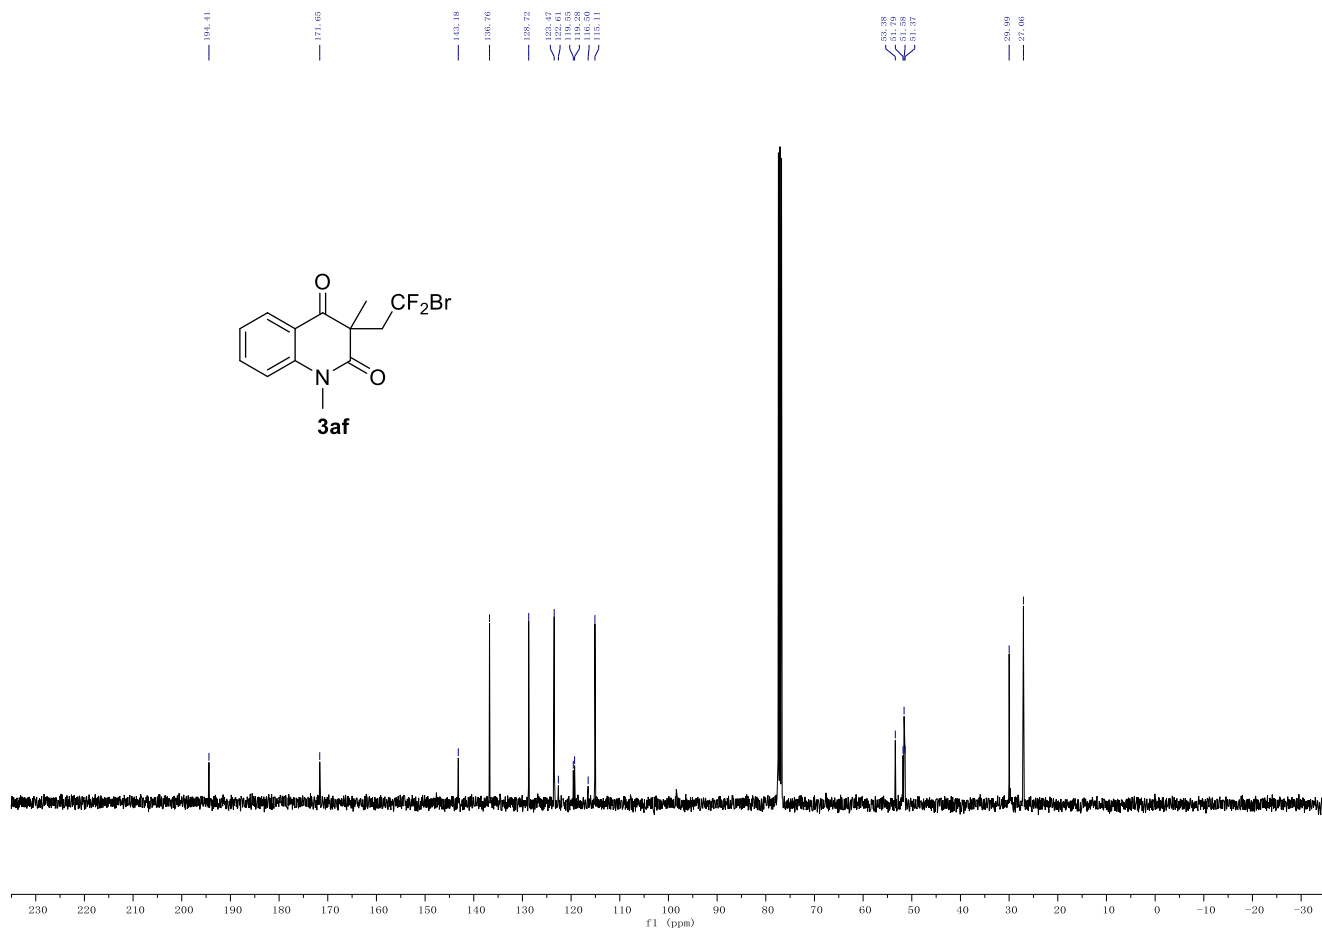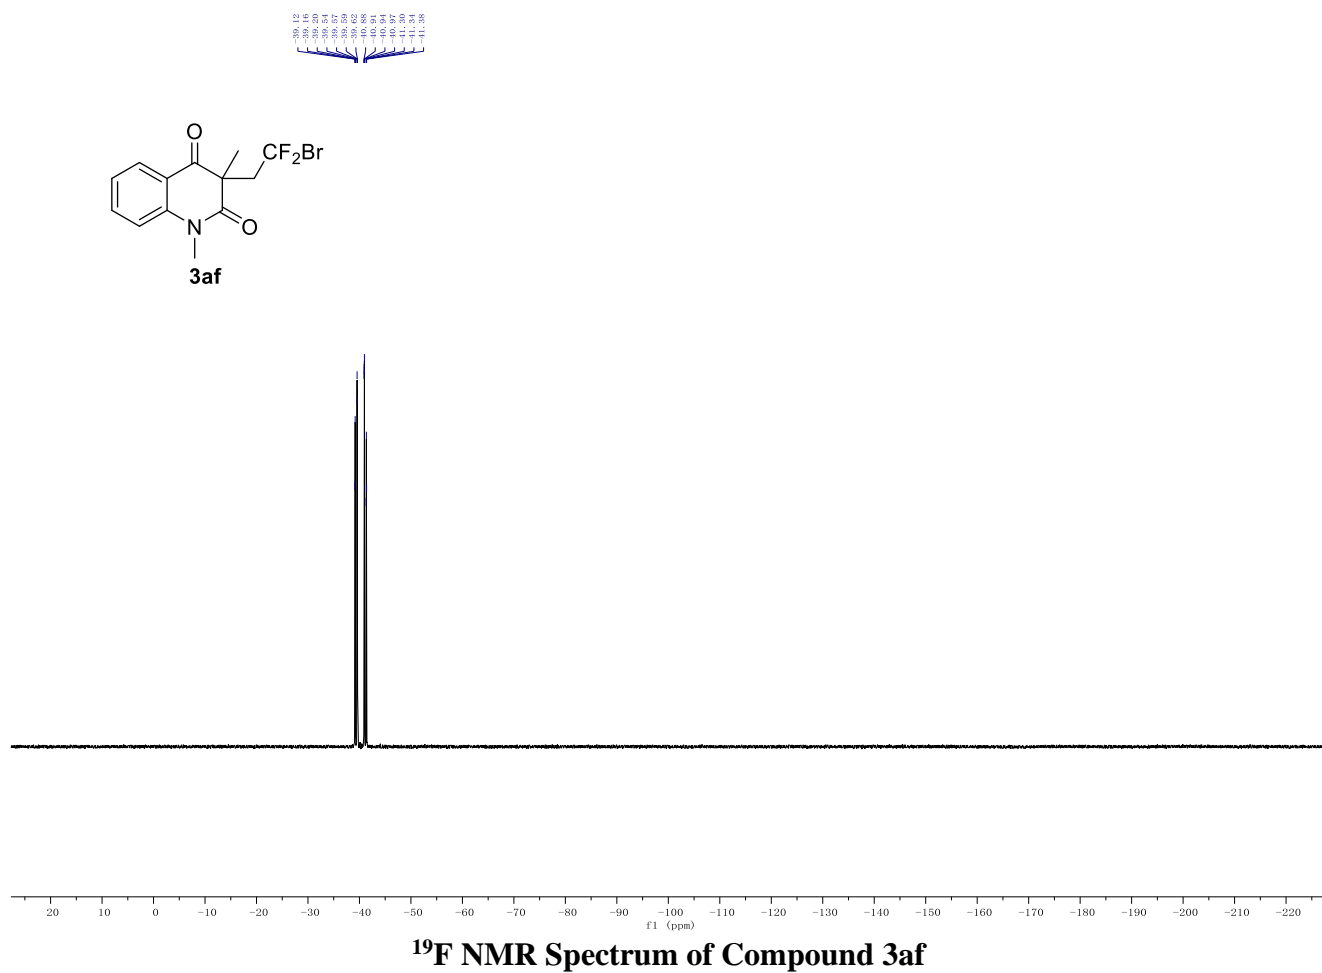

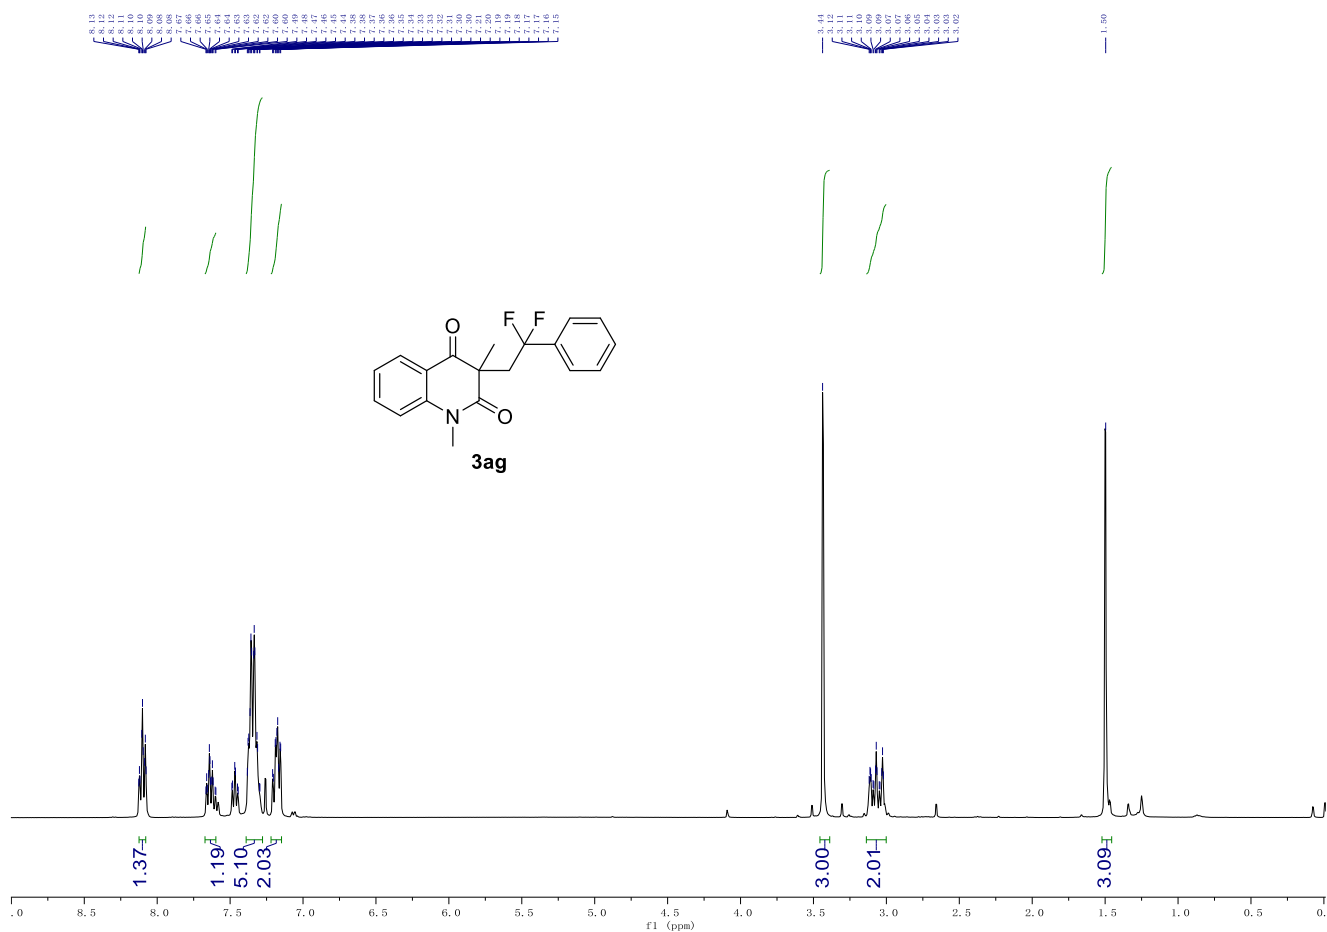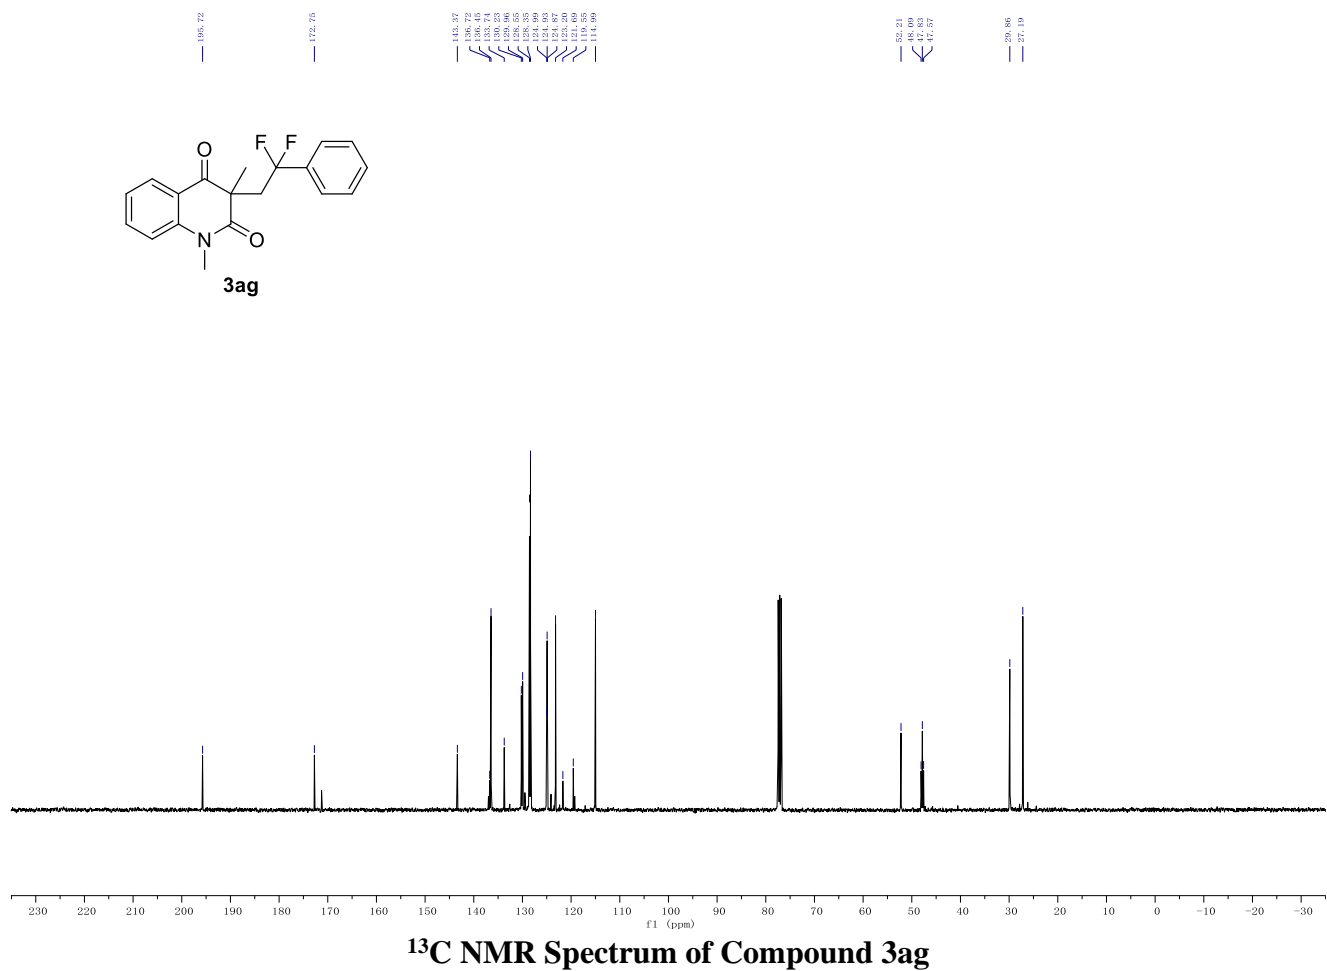

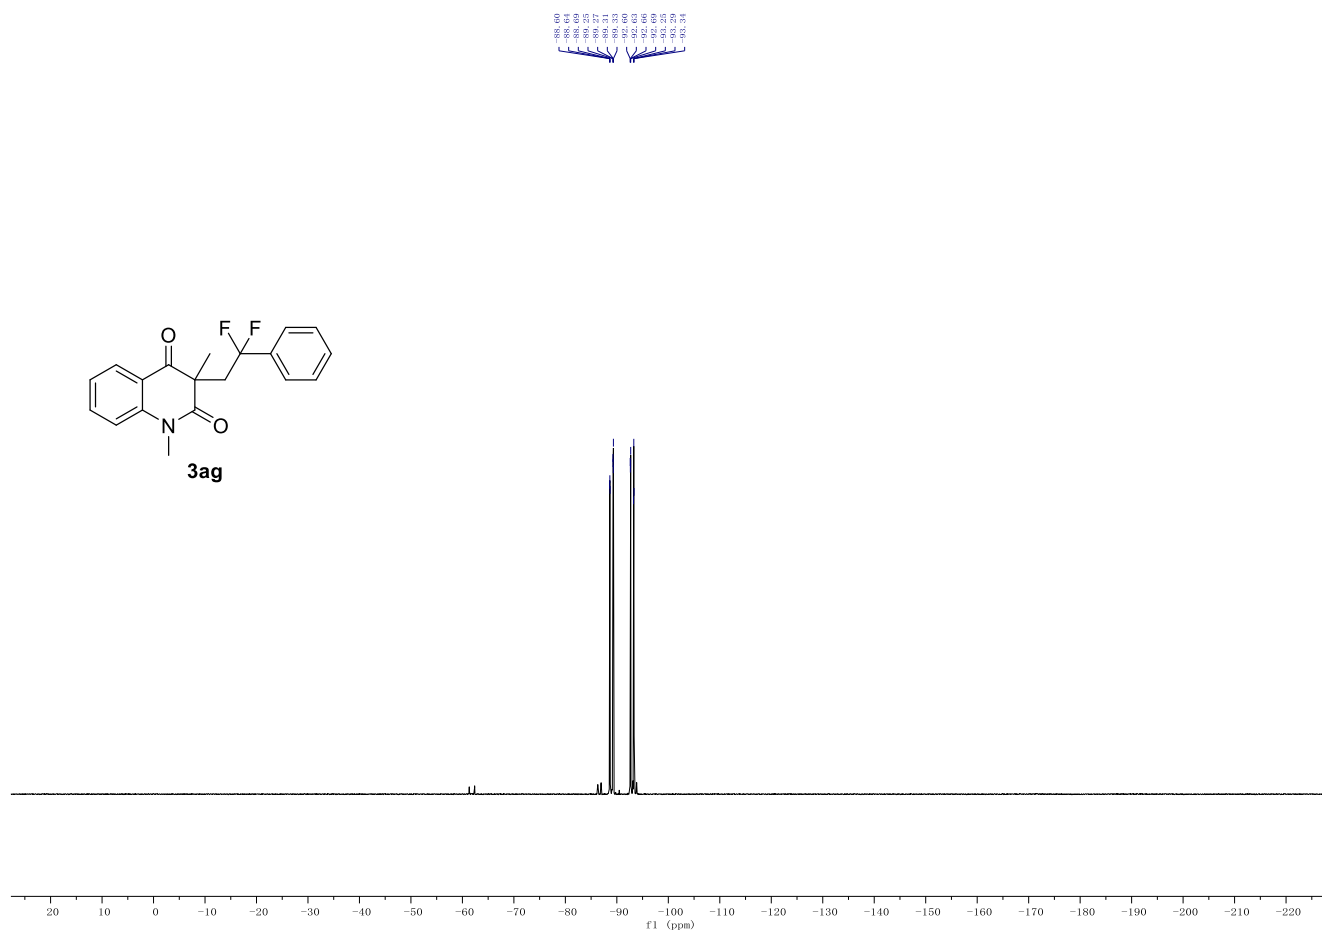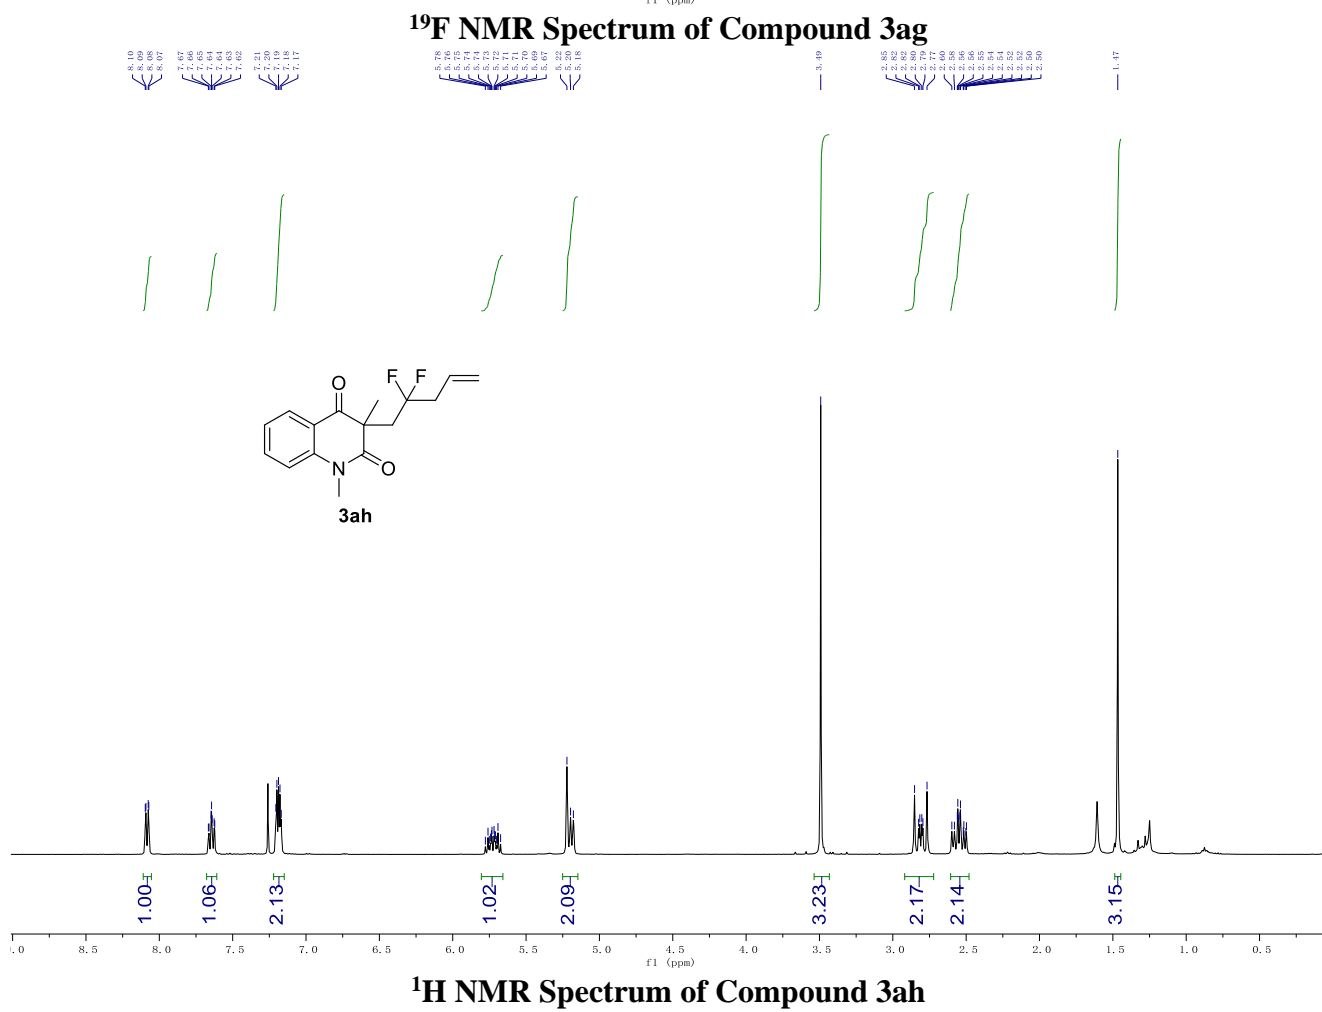

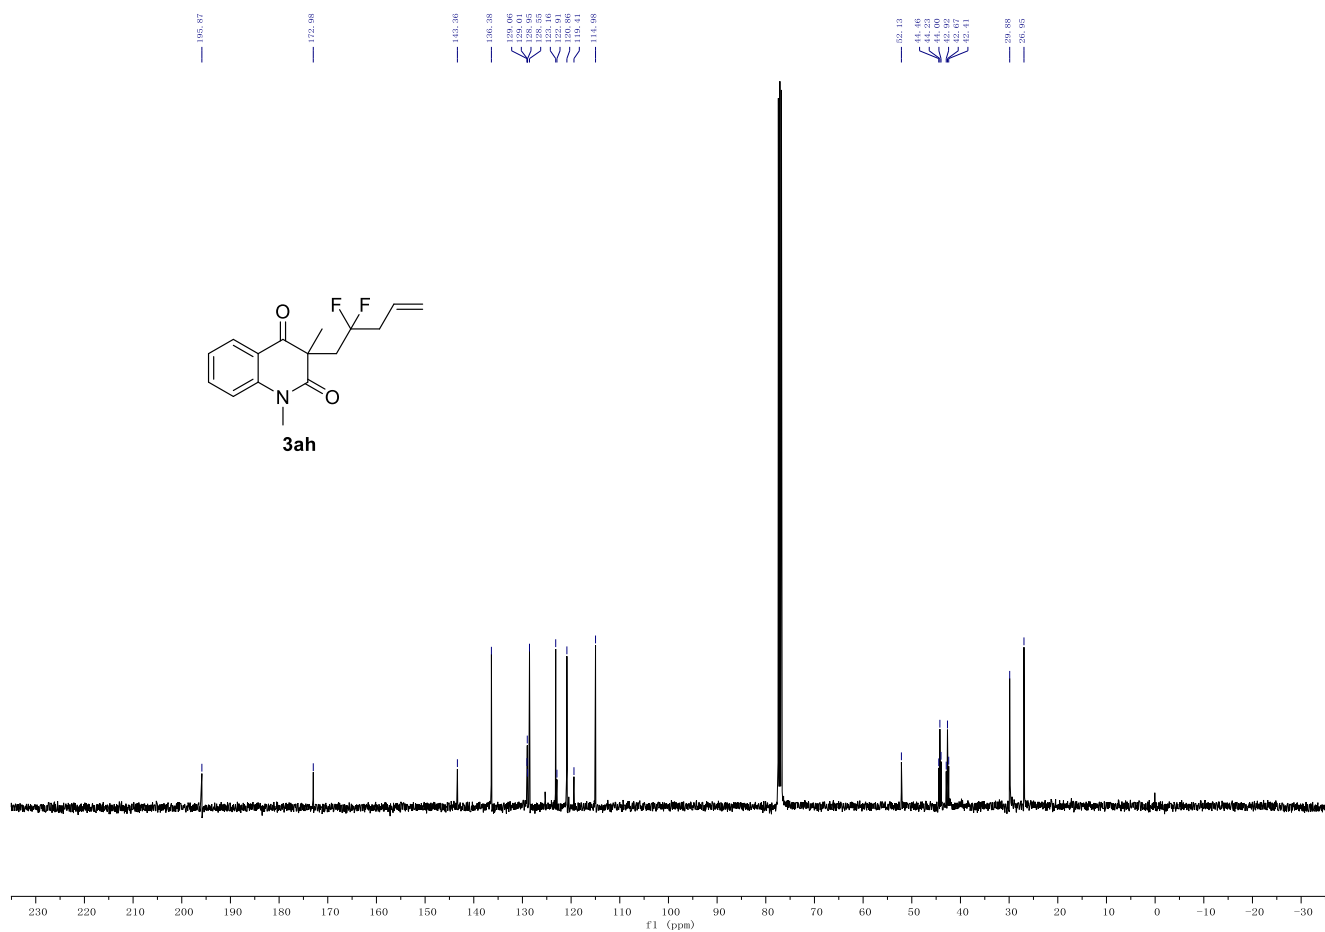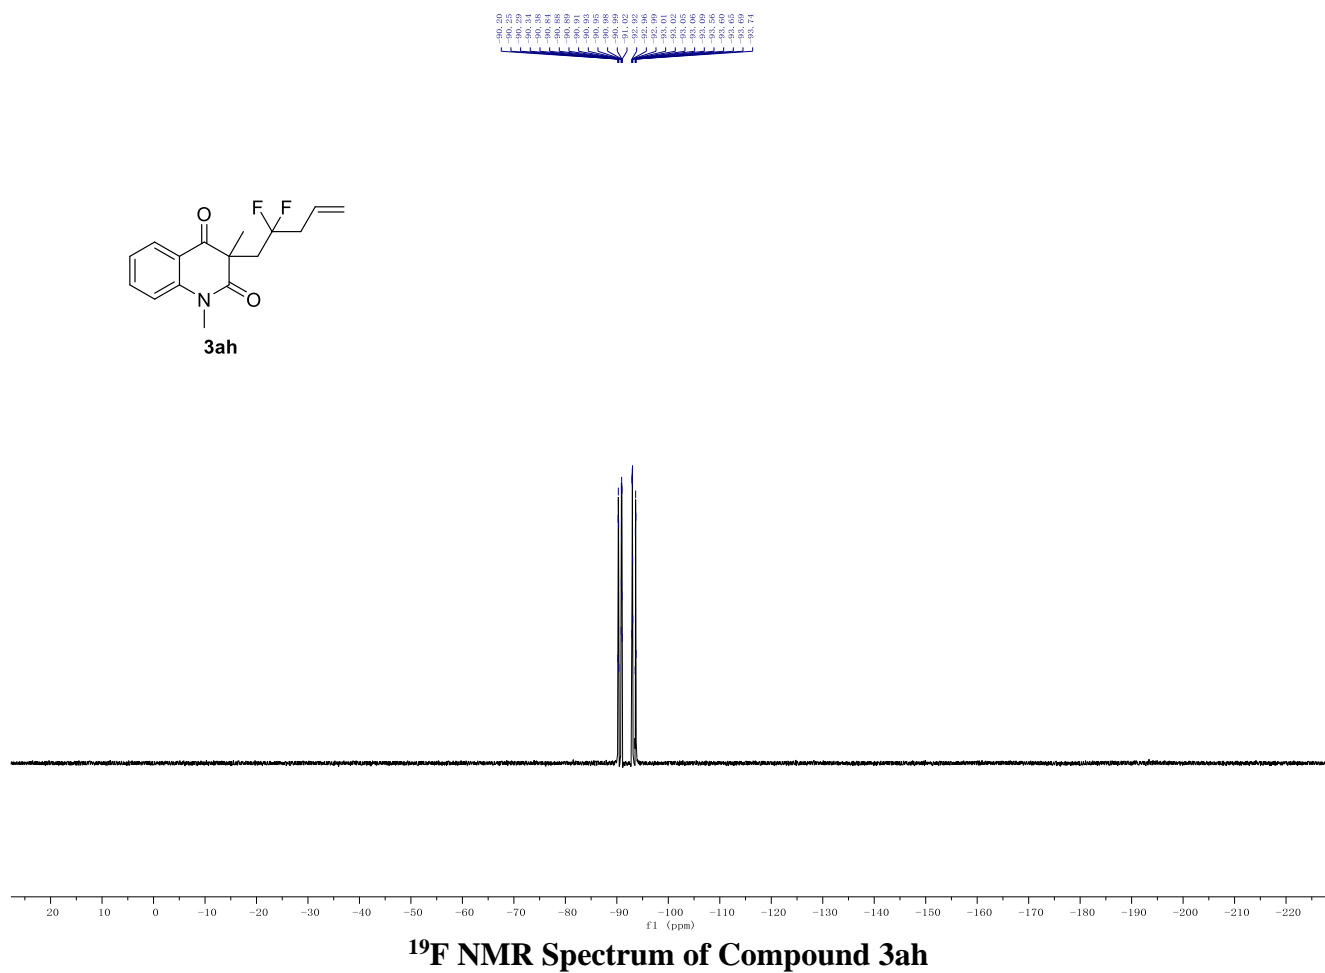

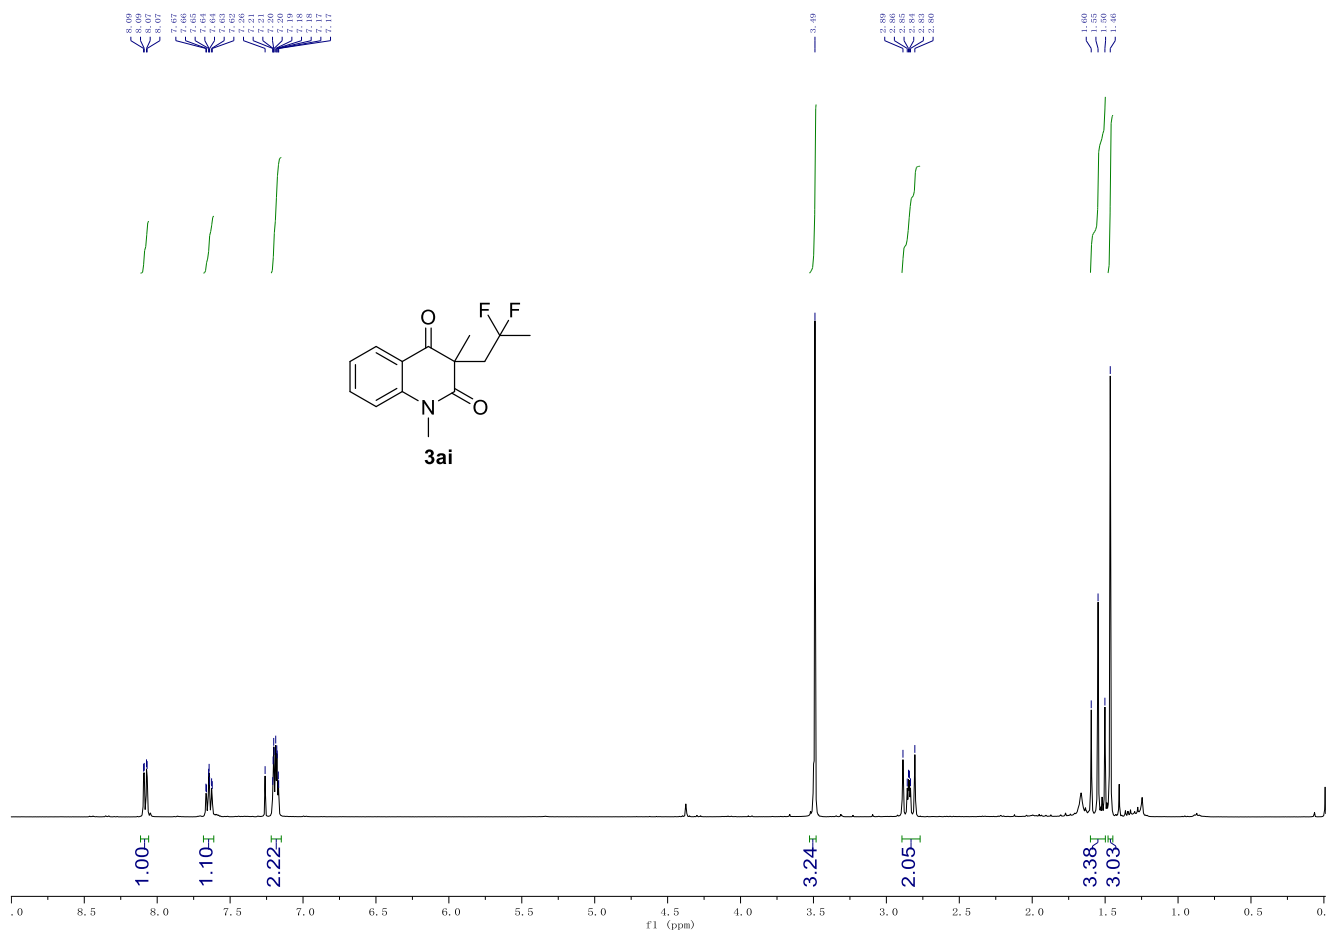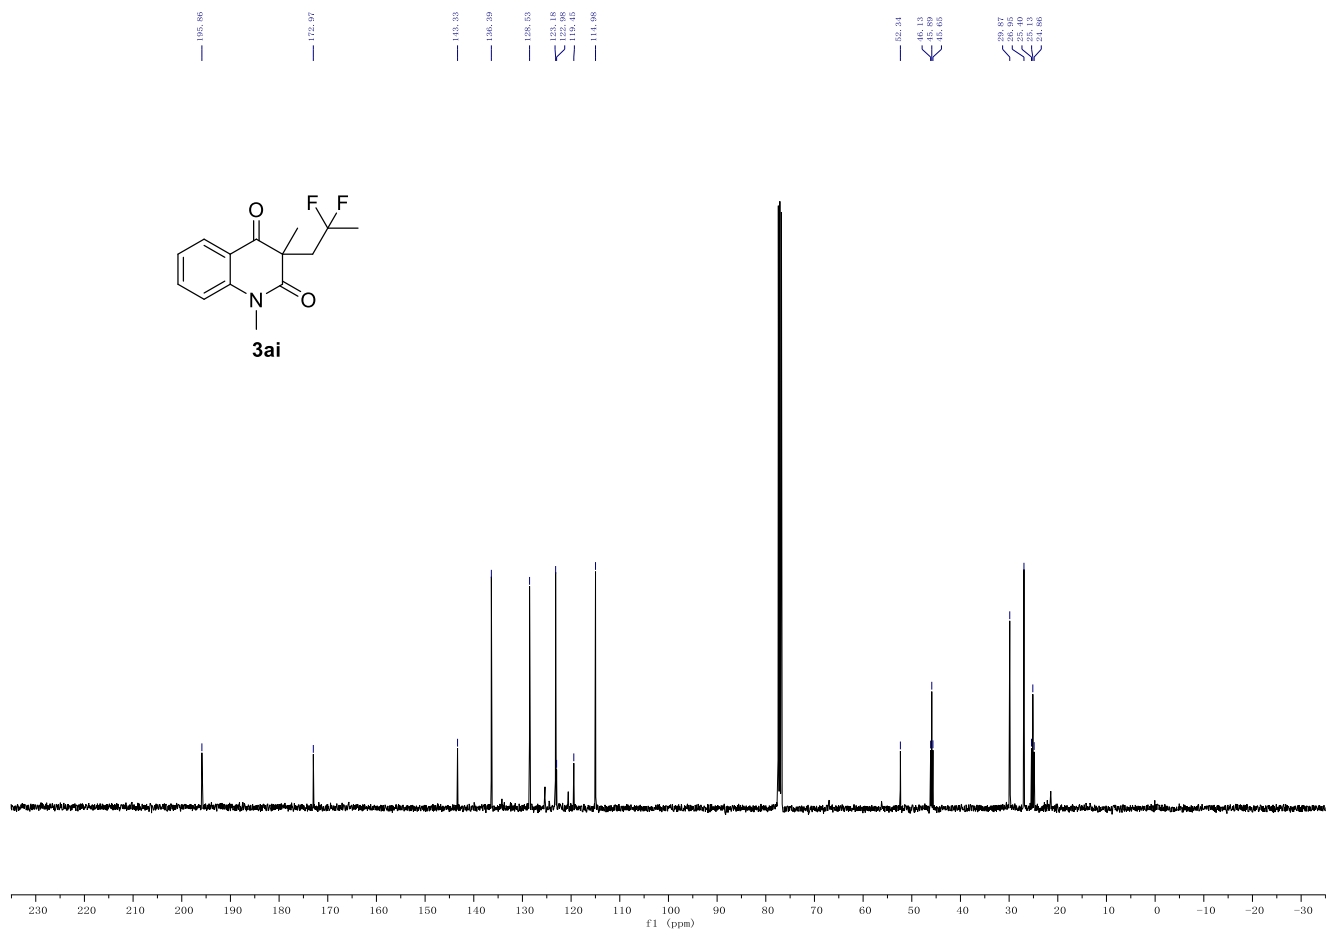

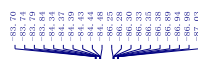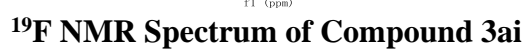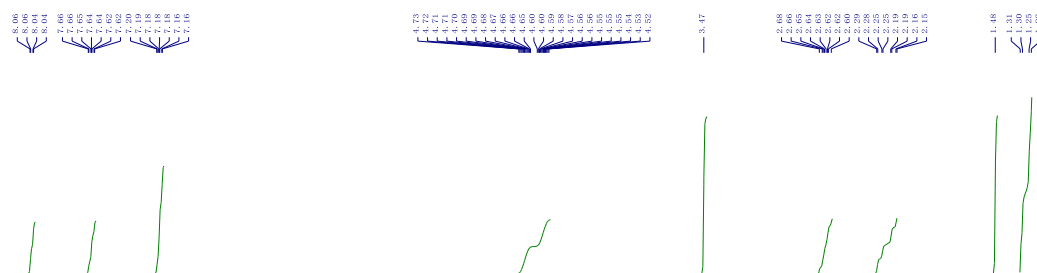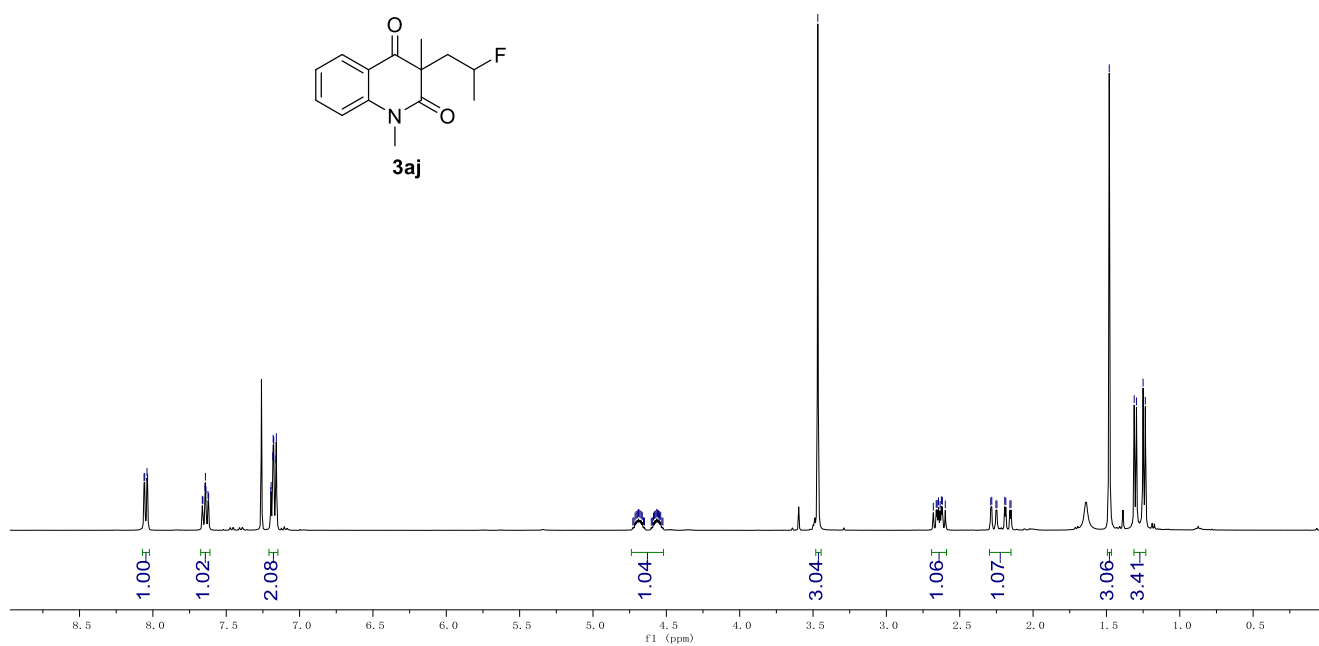

### <sup>1</sup>H NMR Spectrum of Compound 3aj

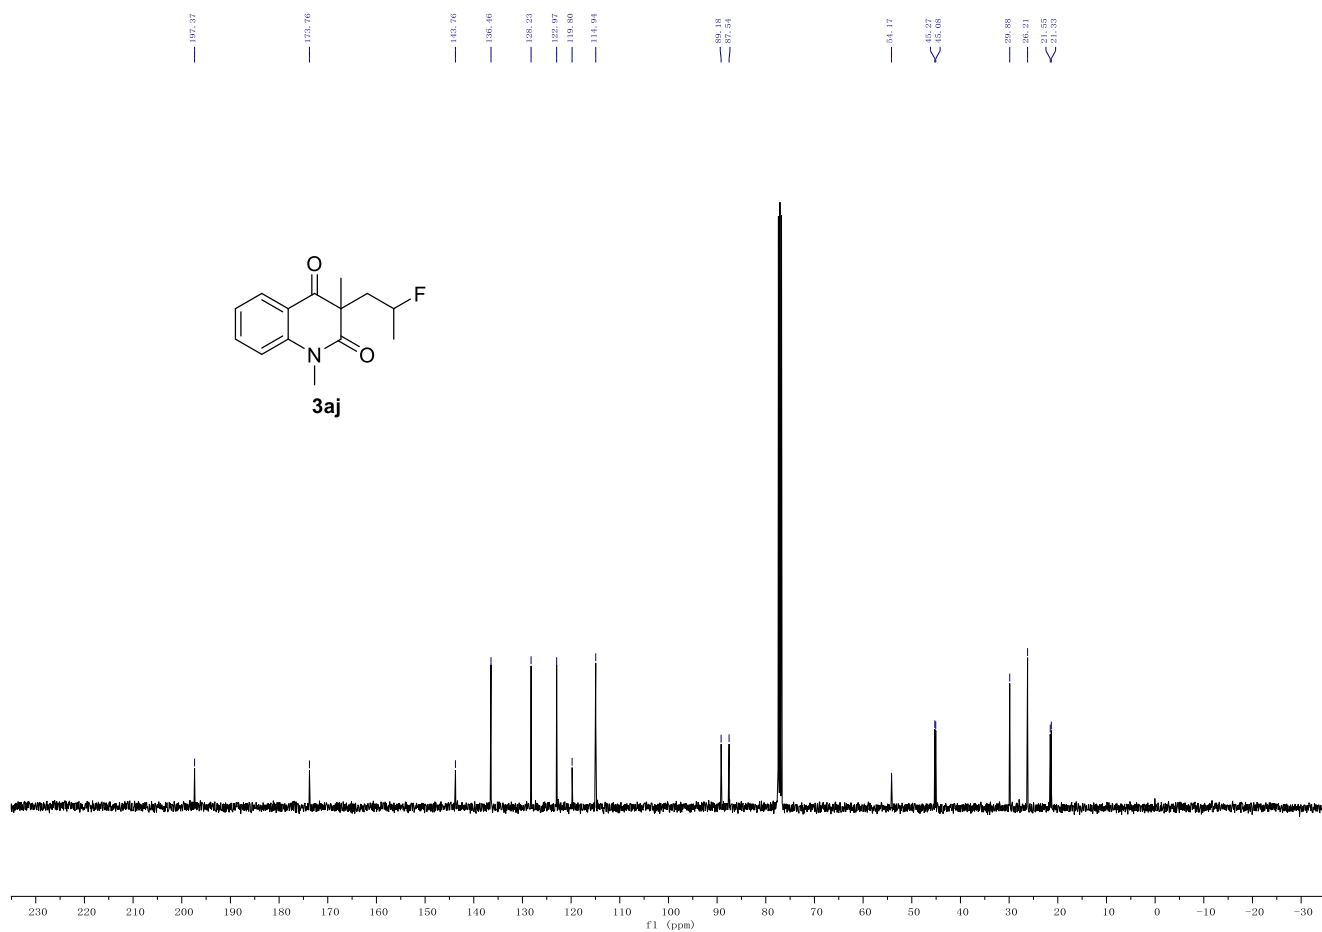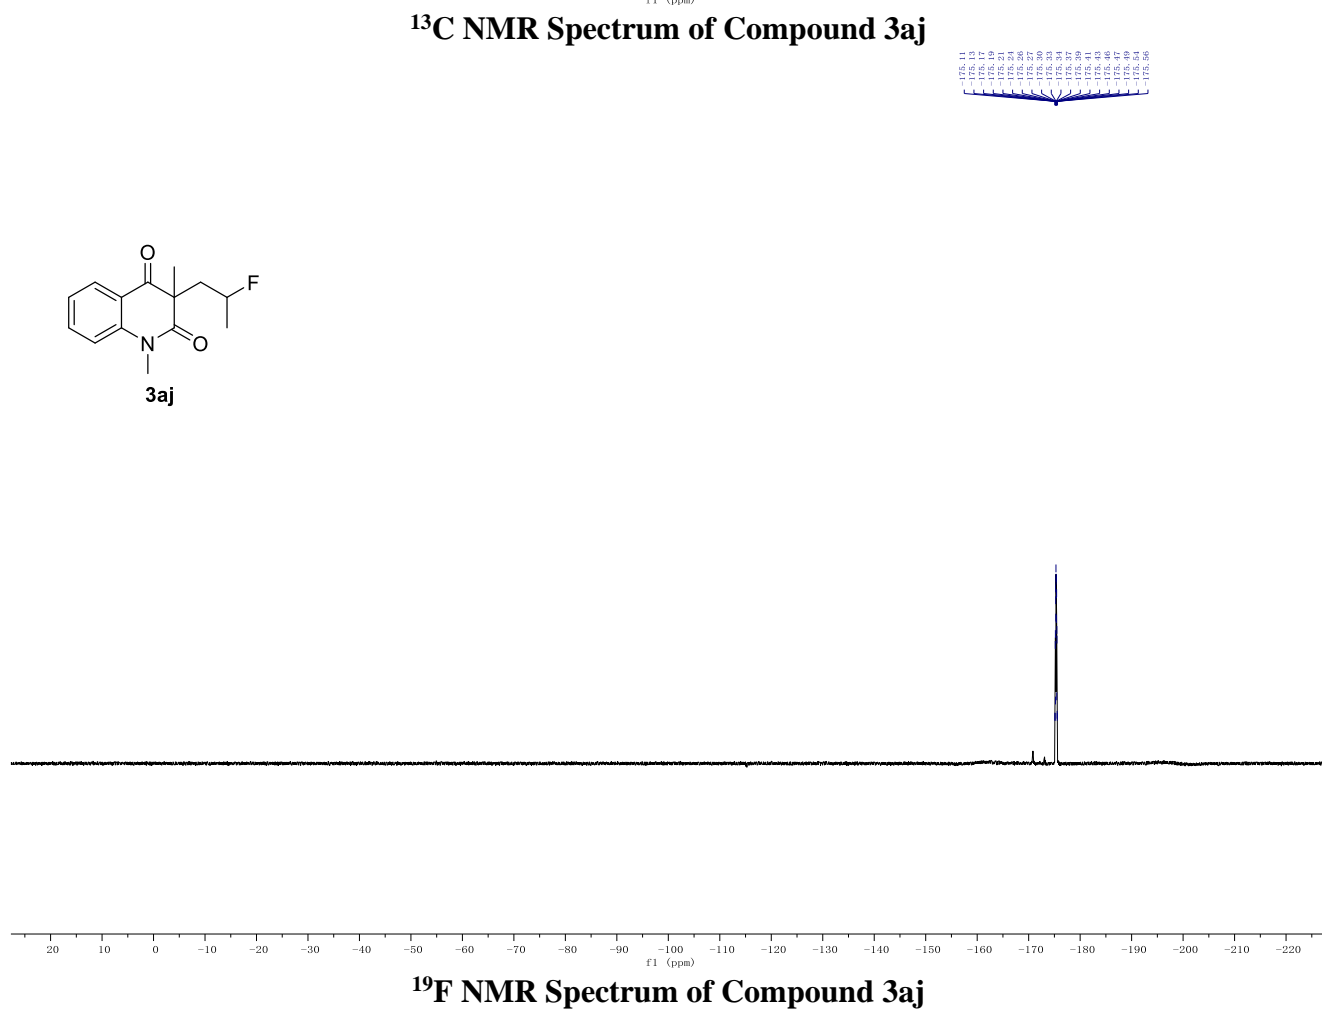

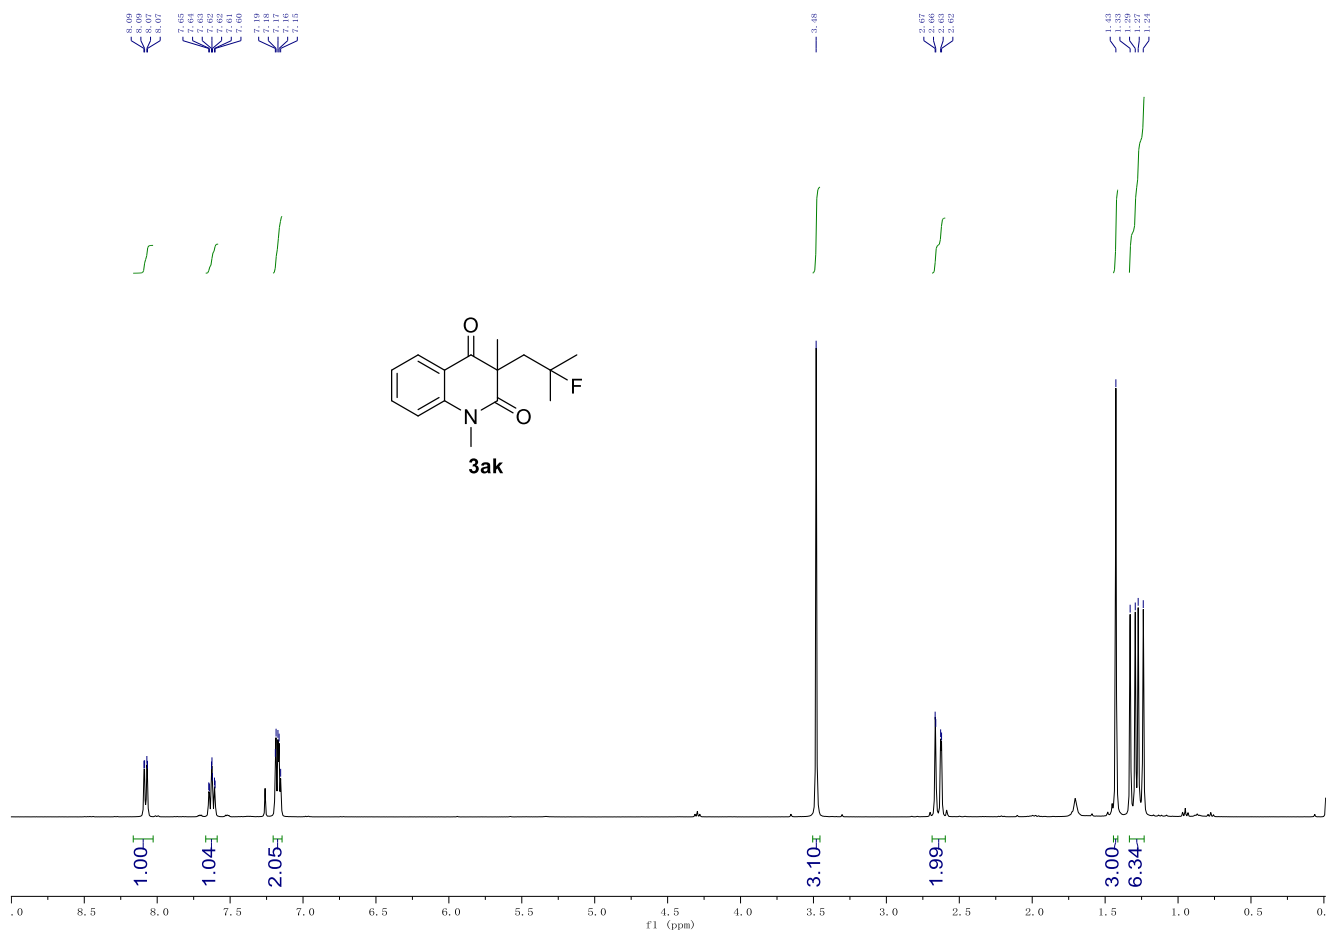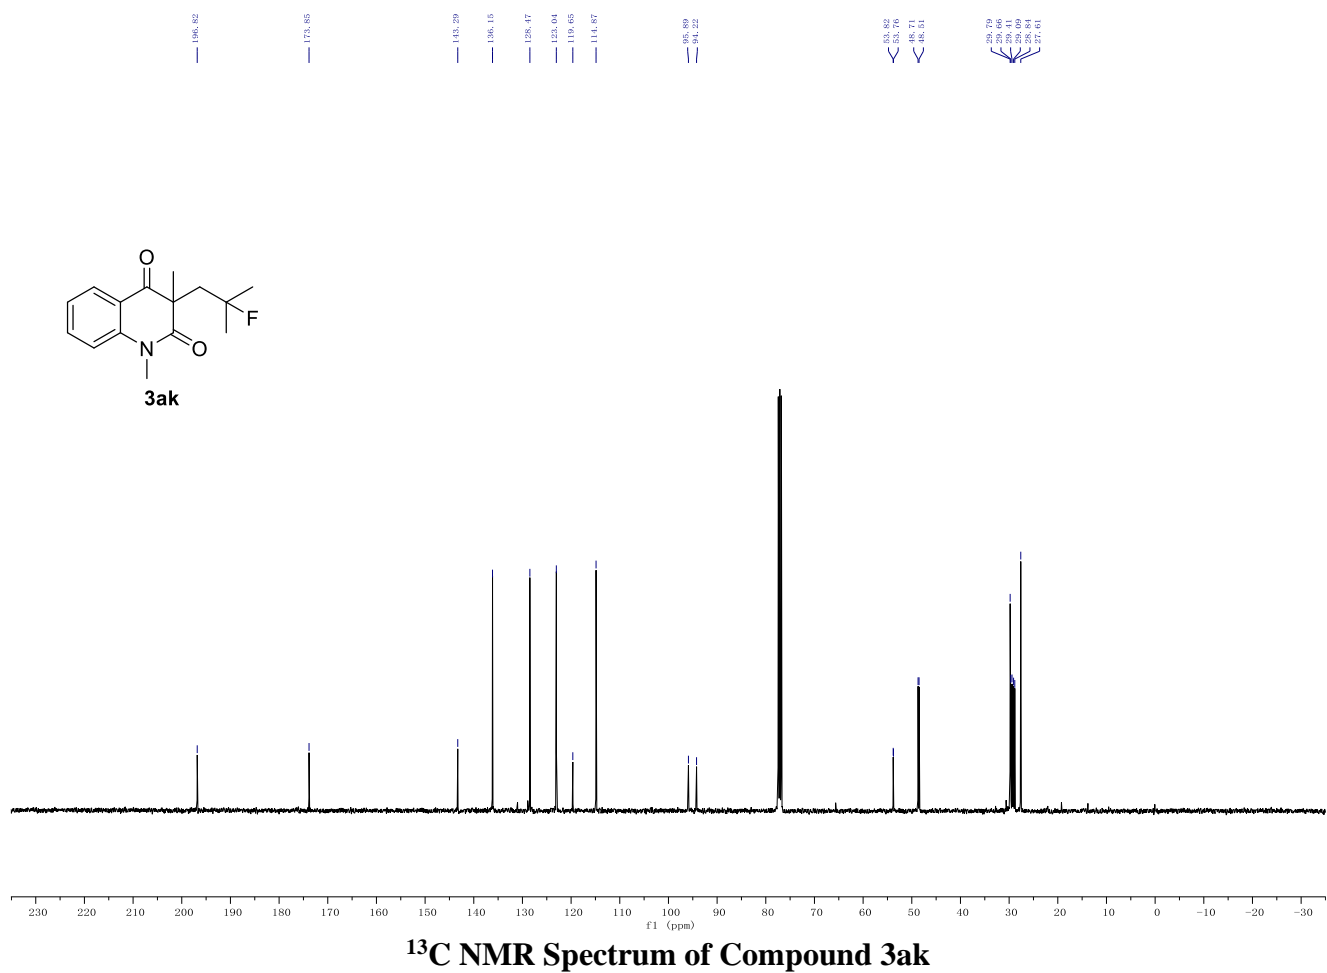

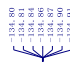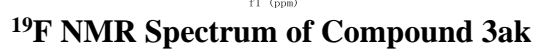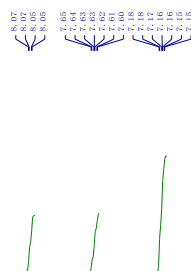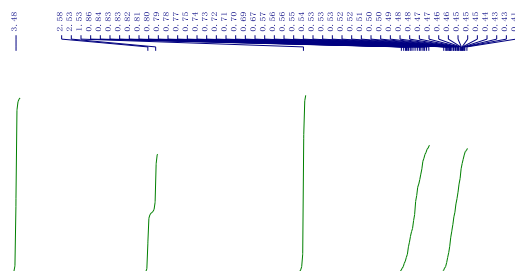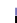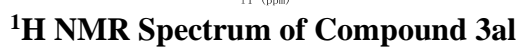

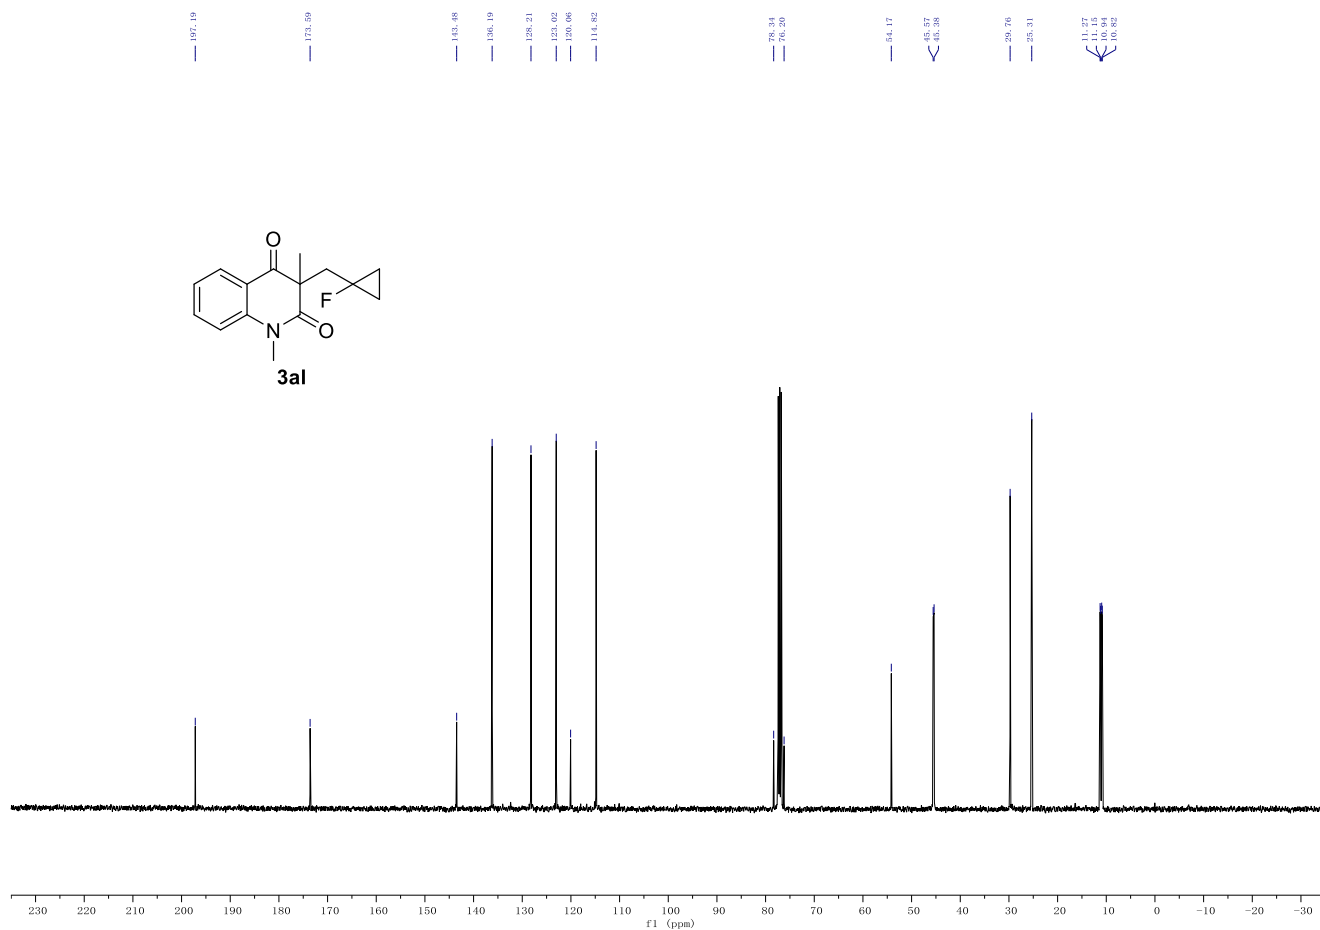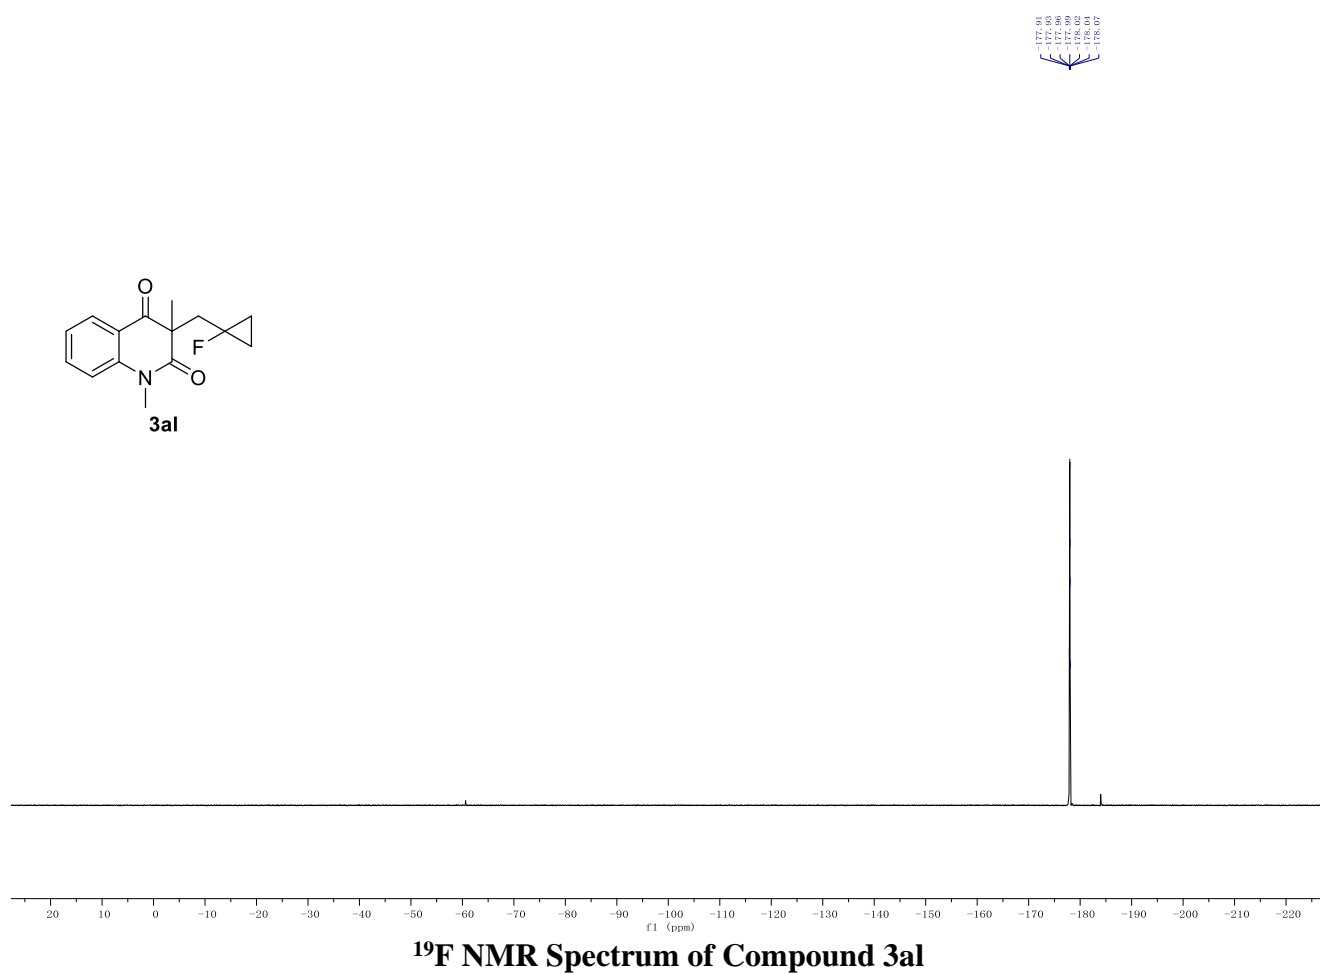

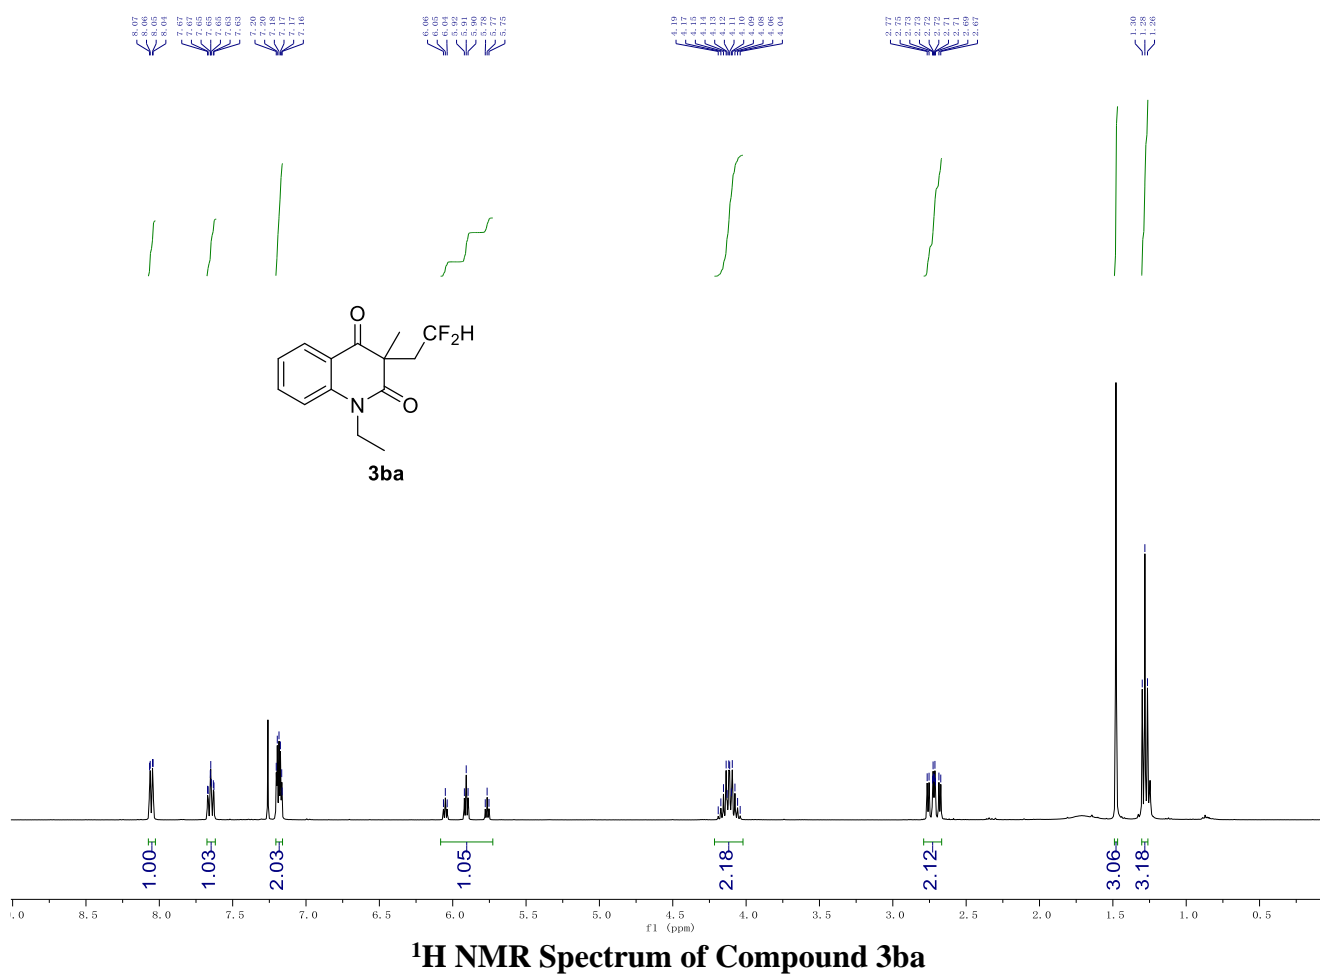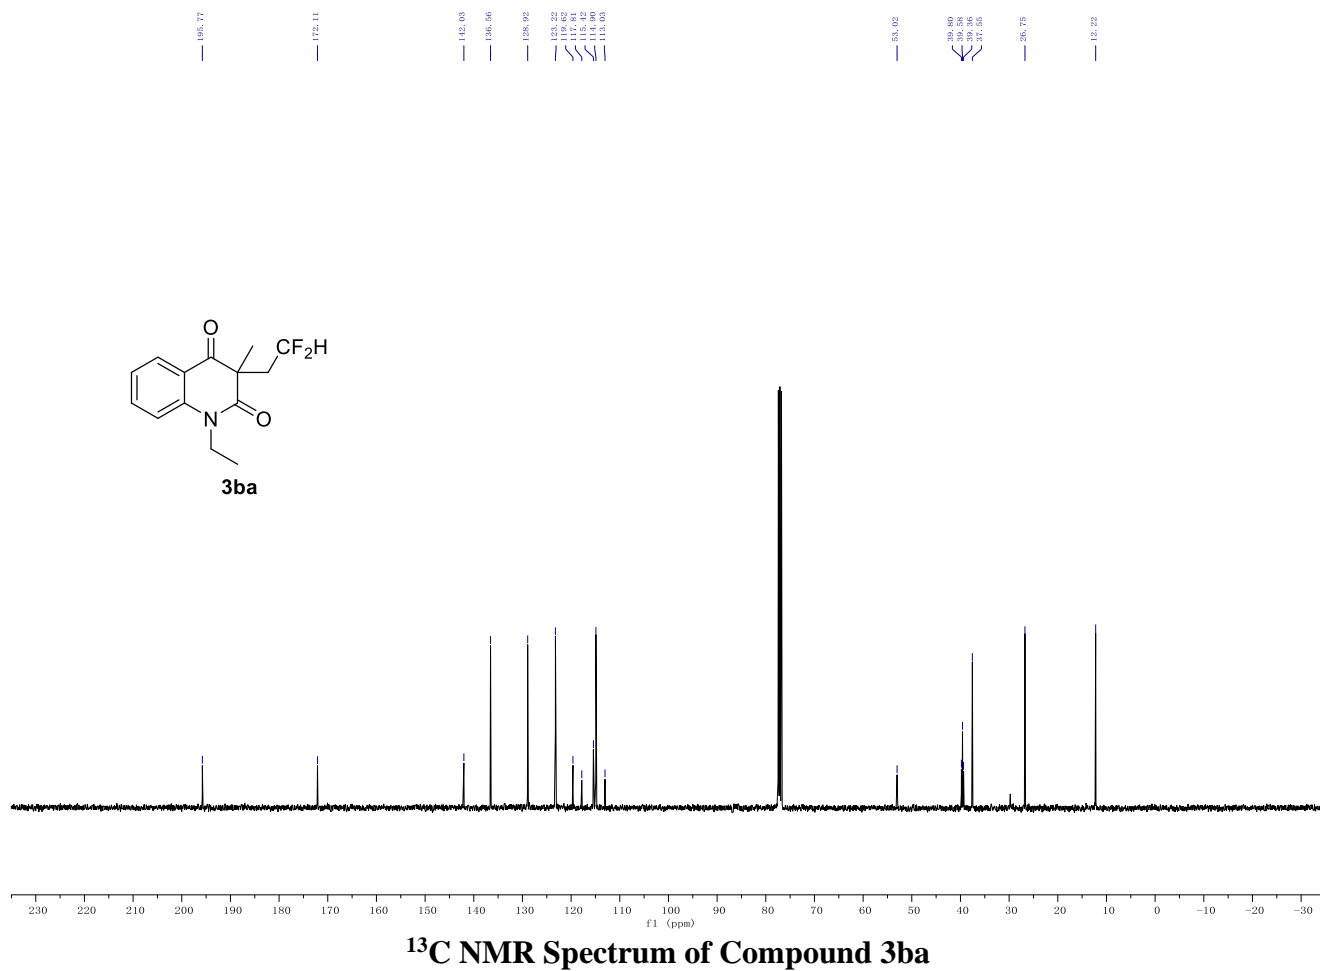

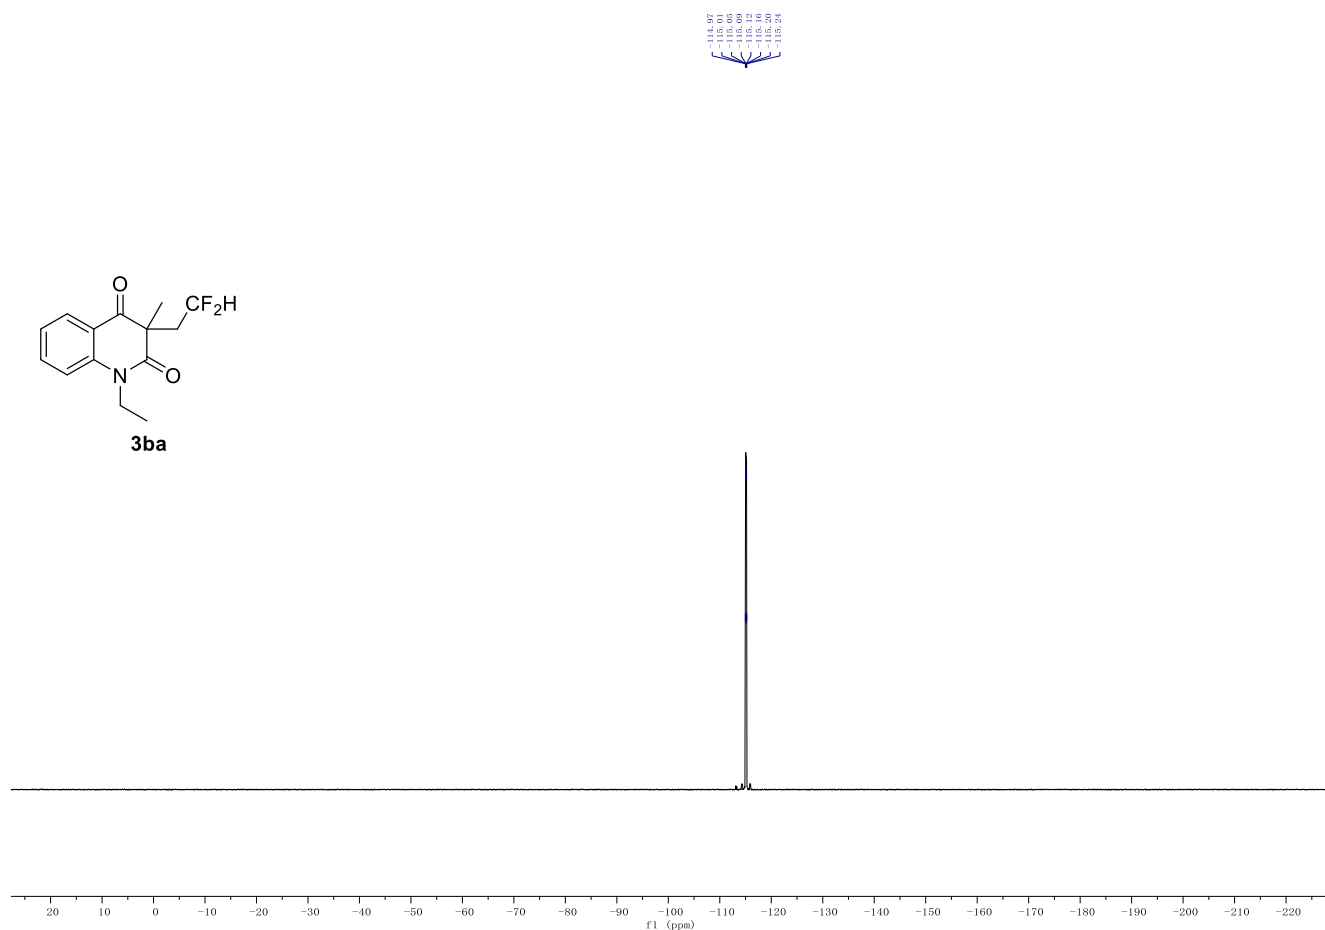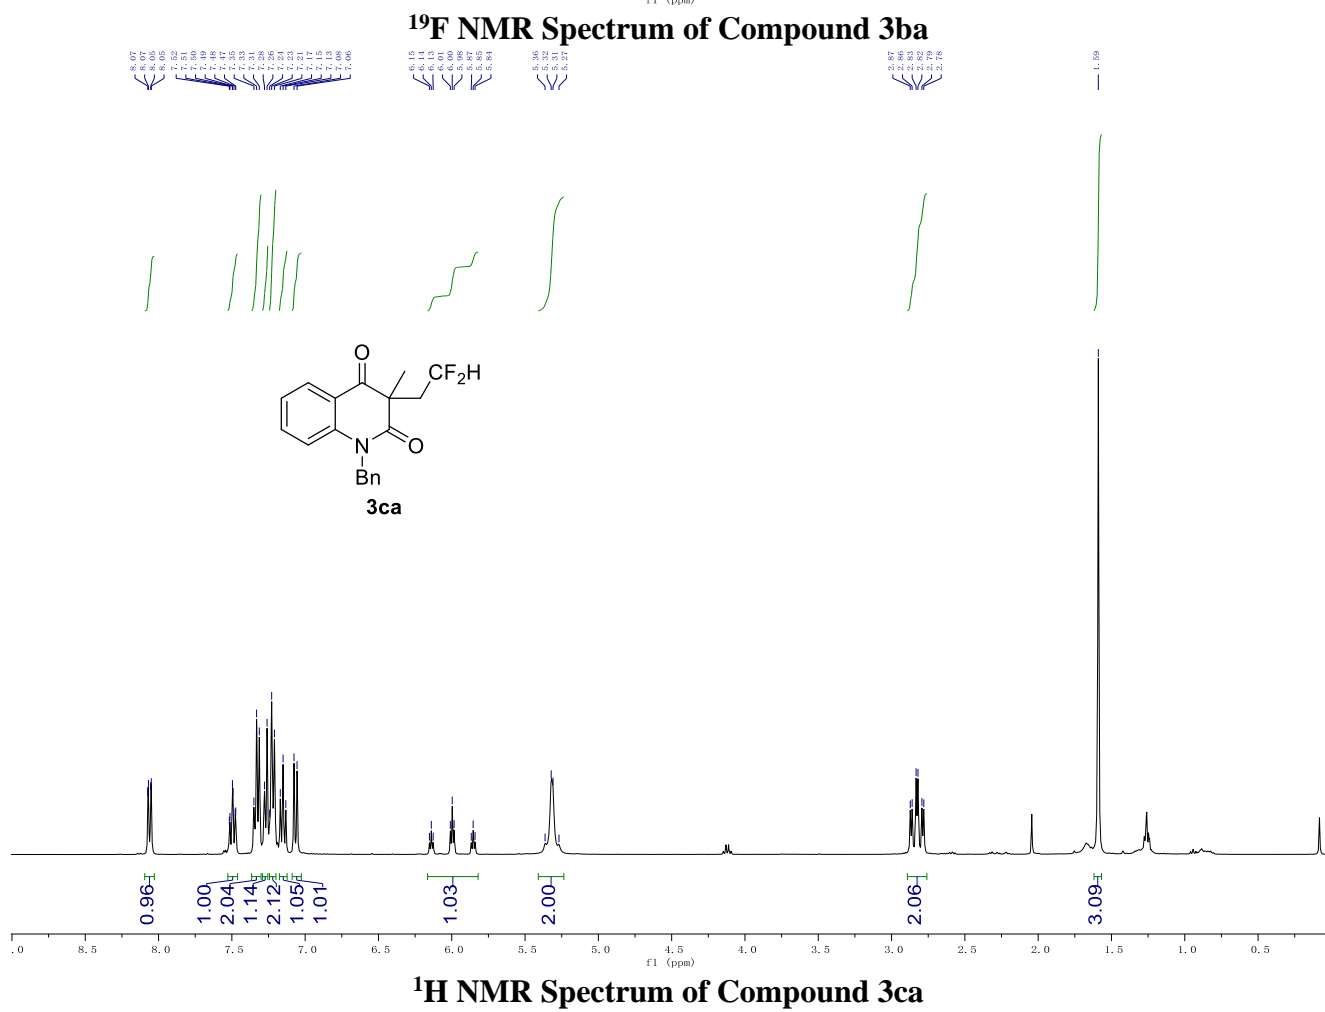

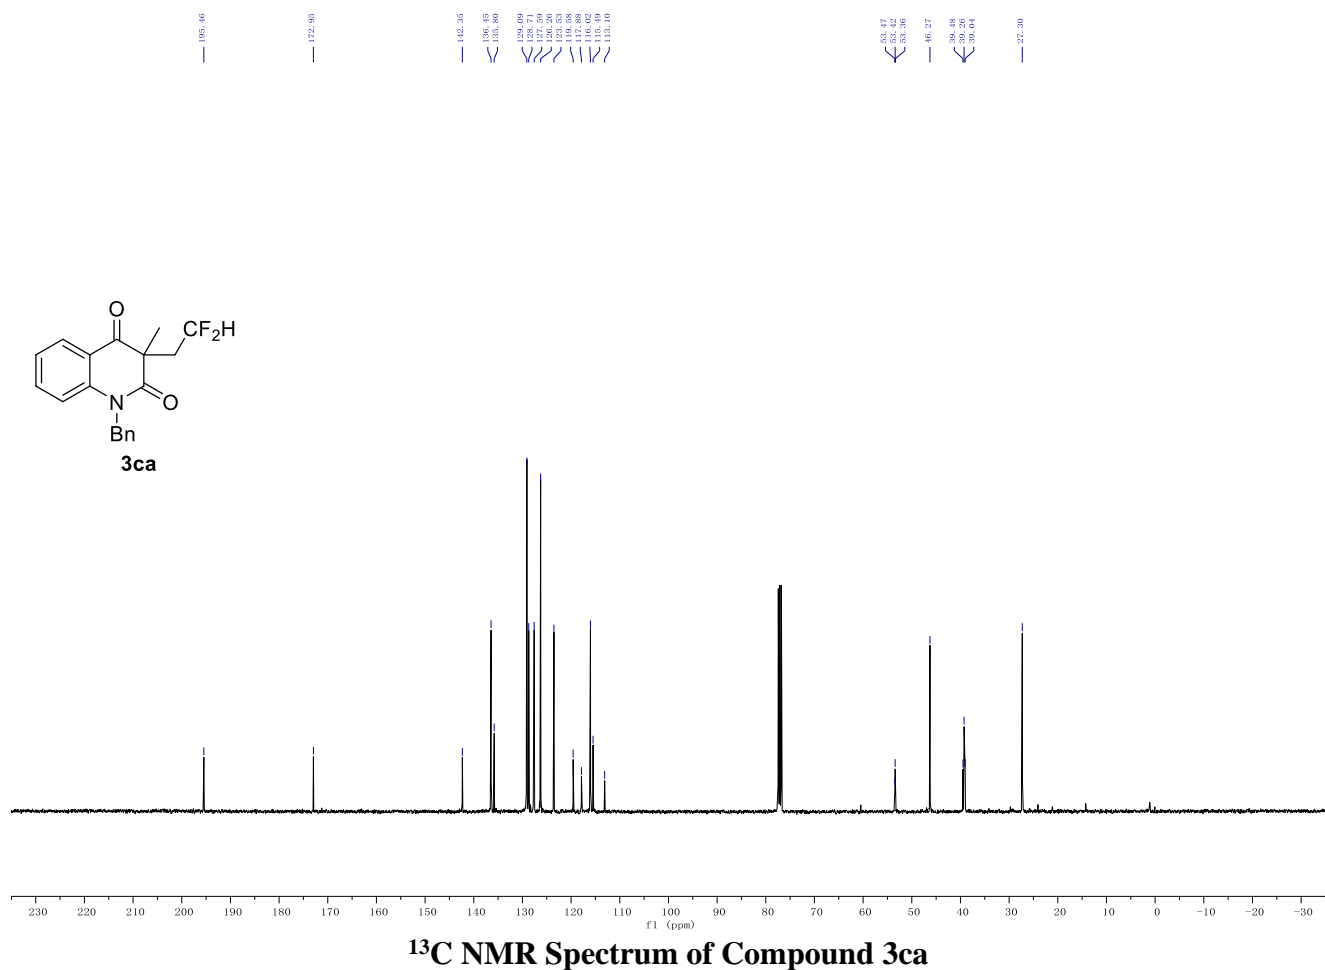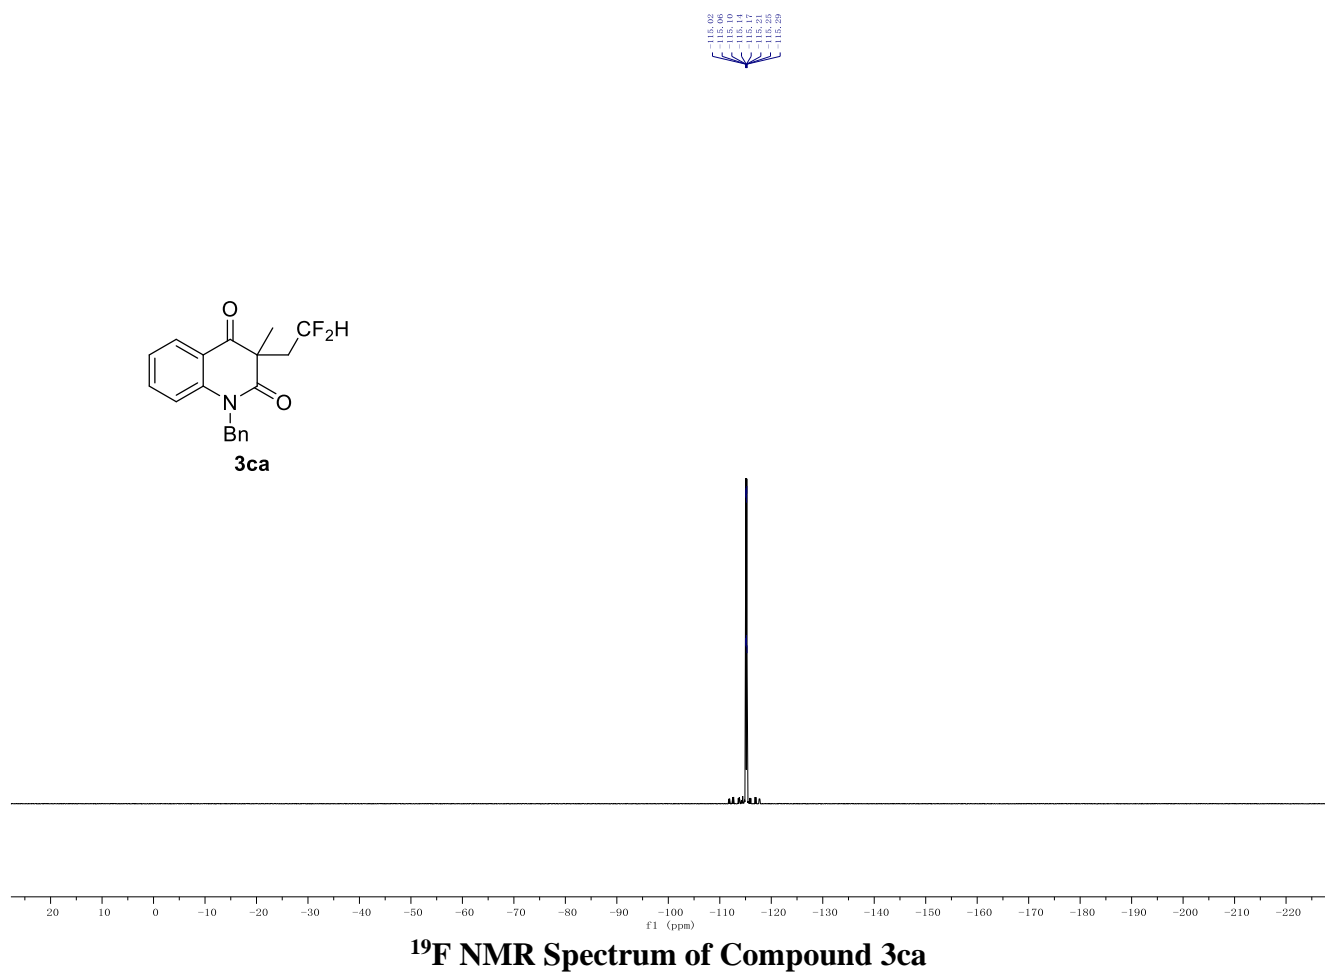

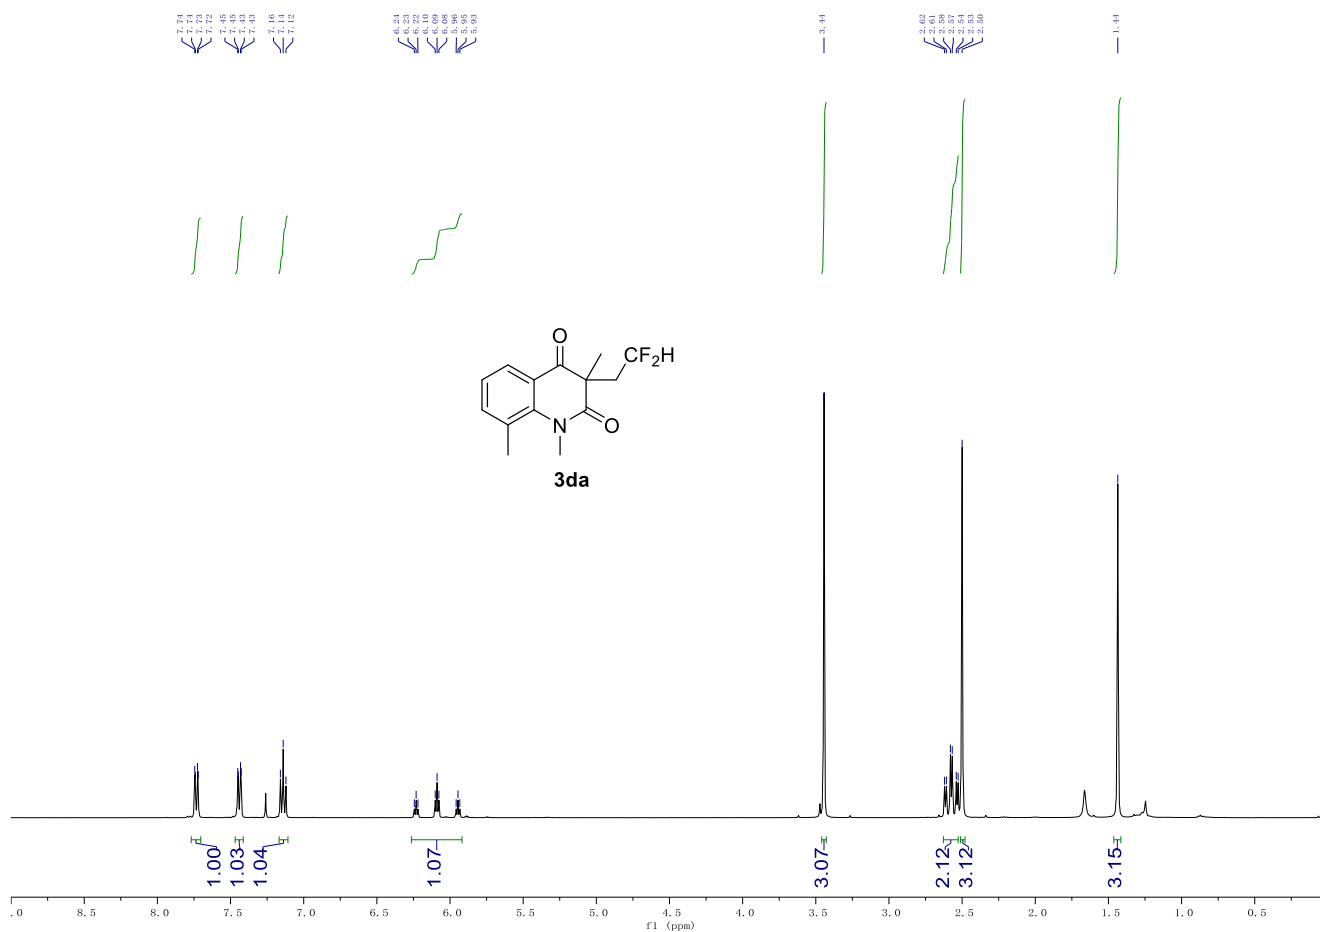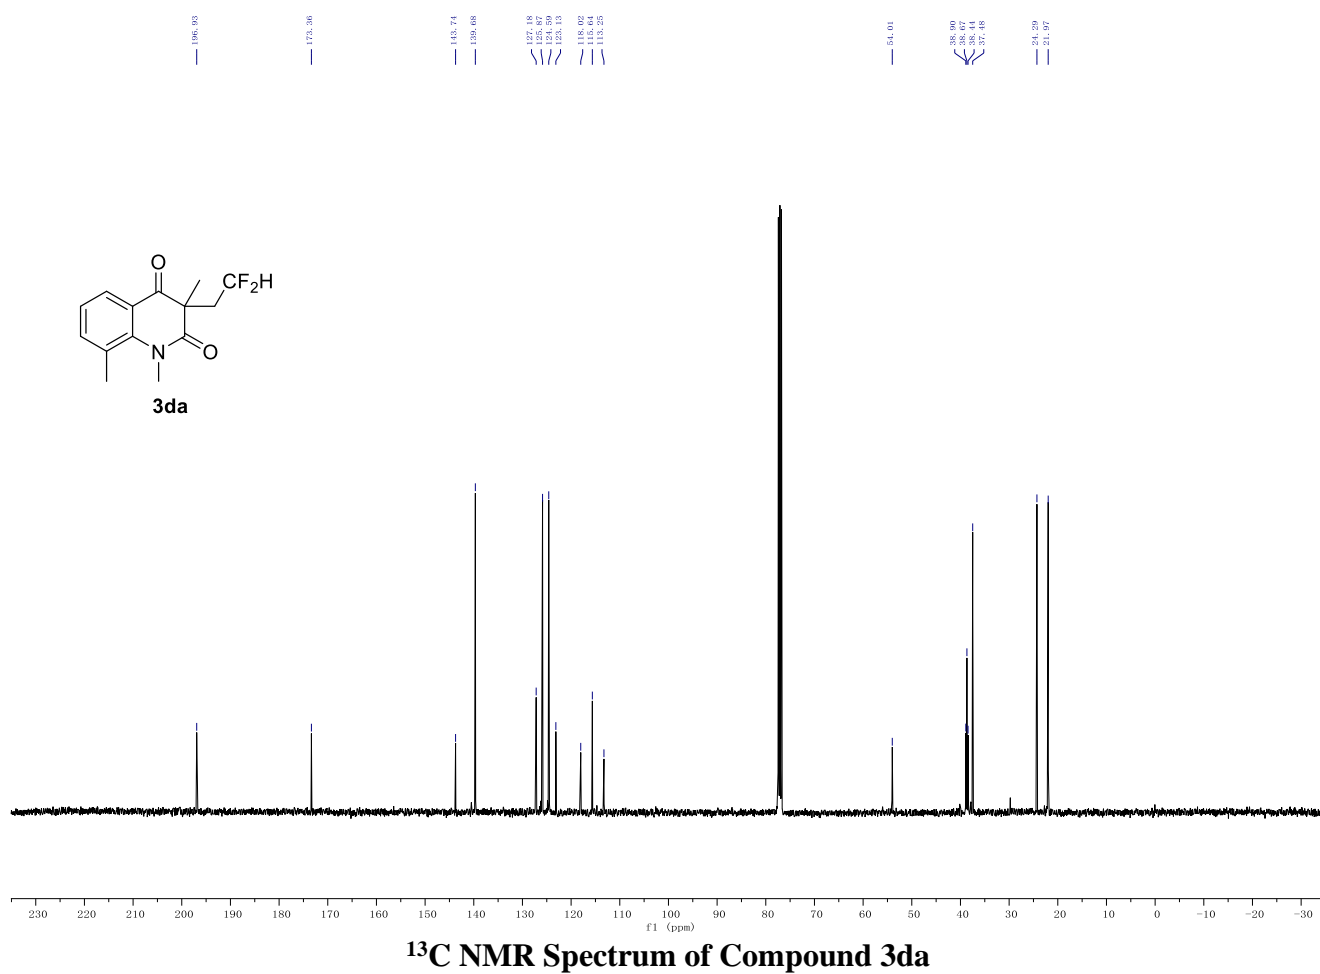

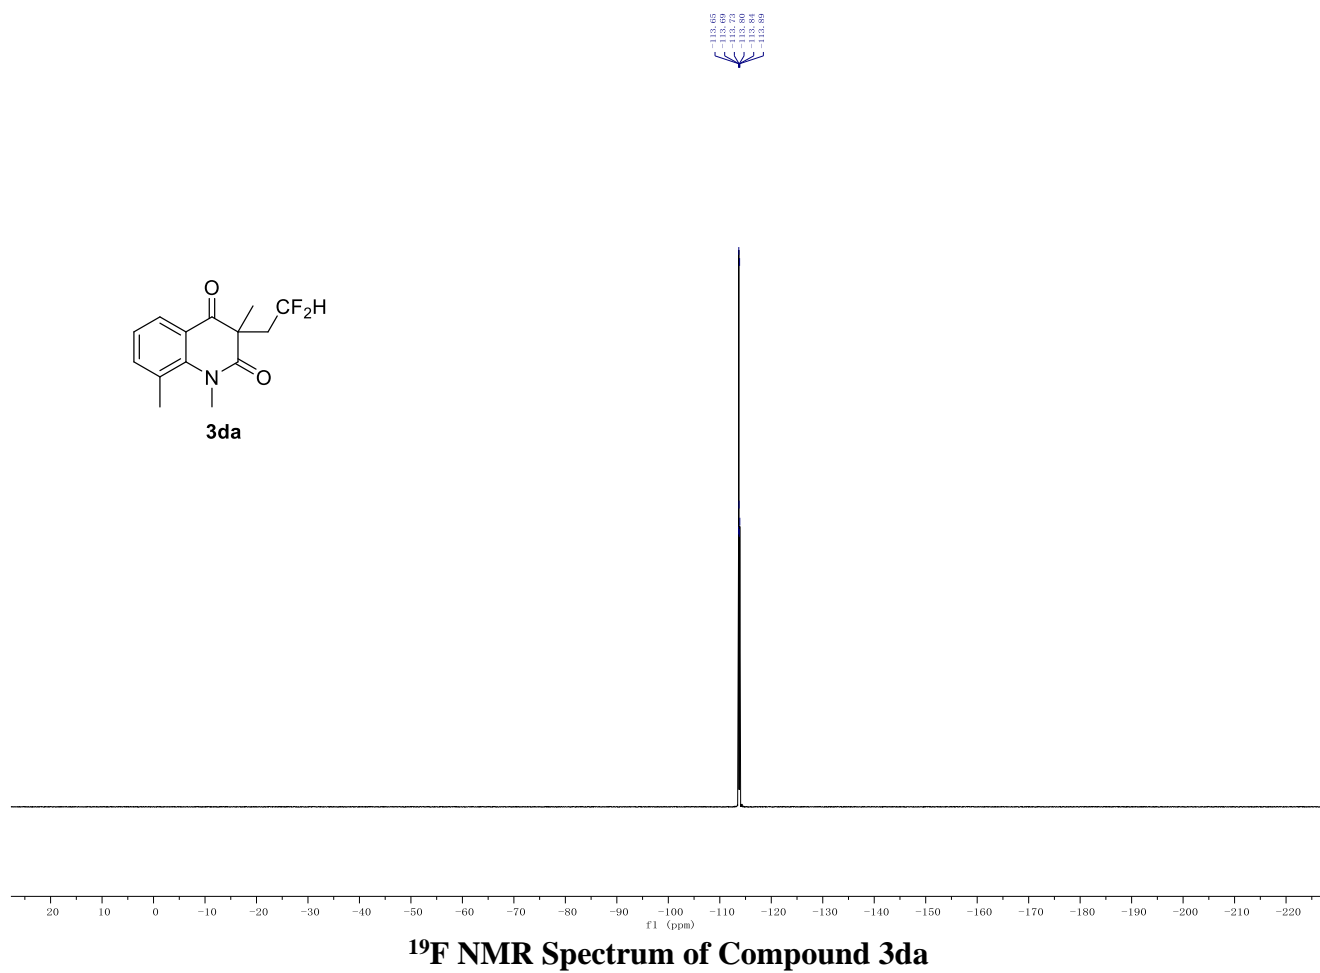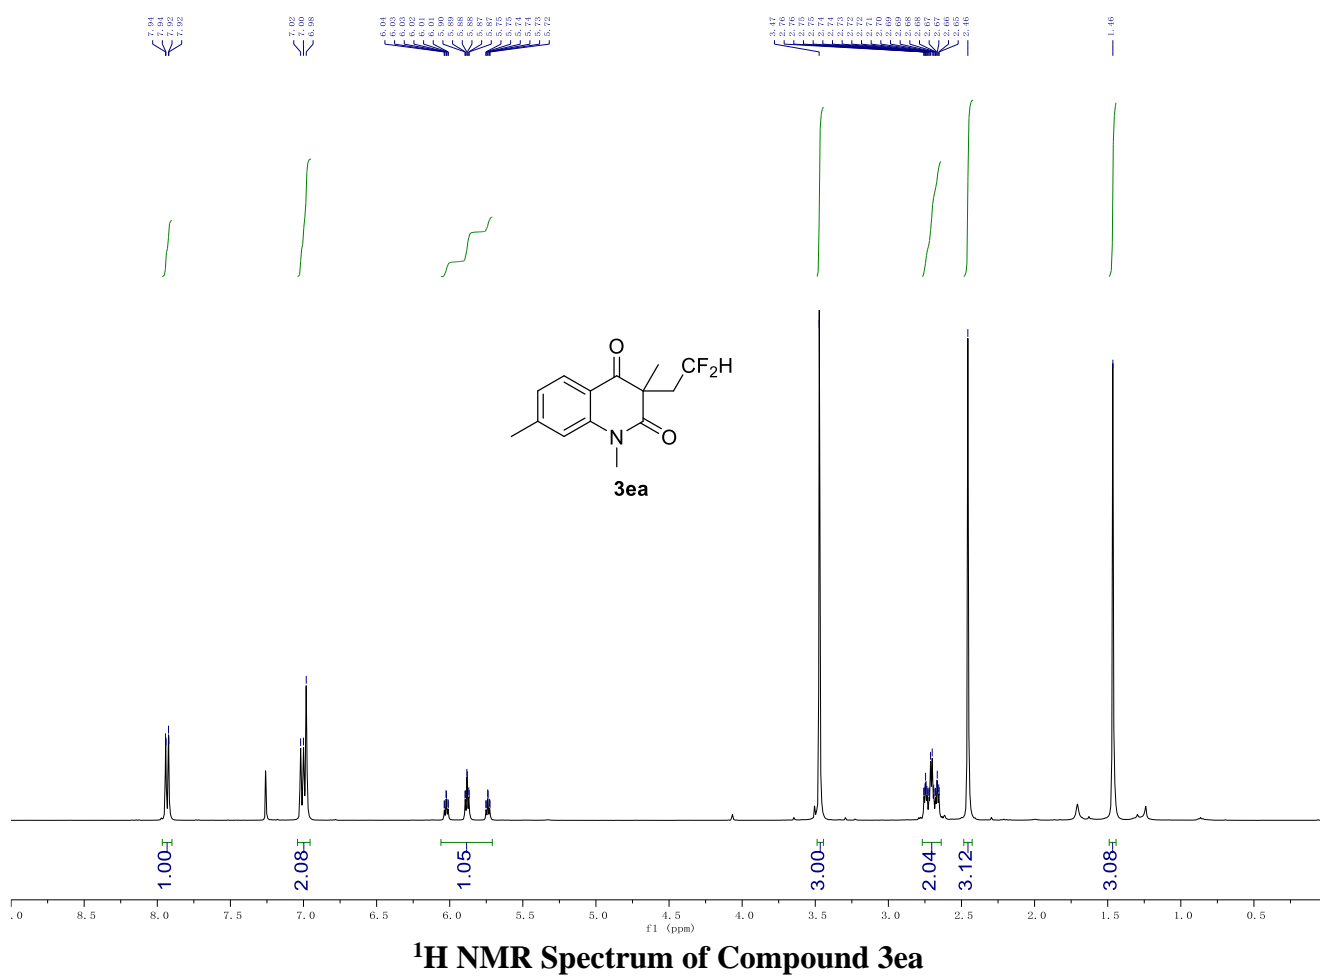

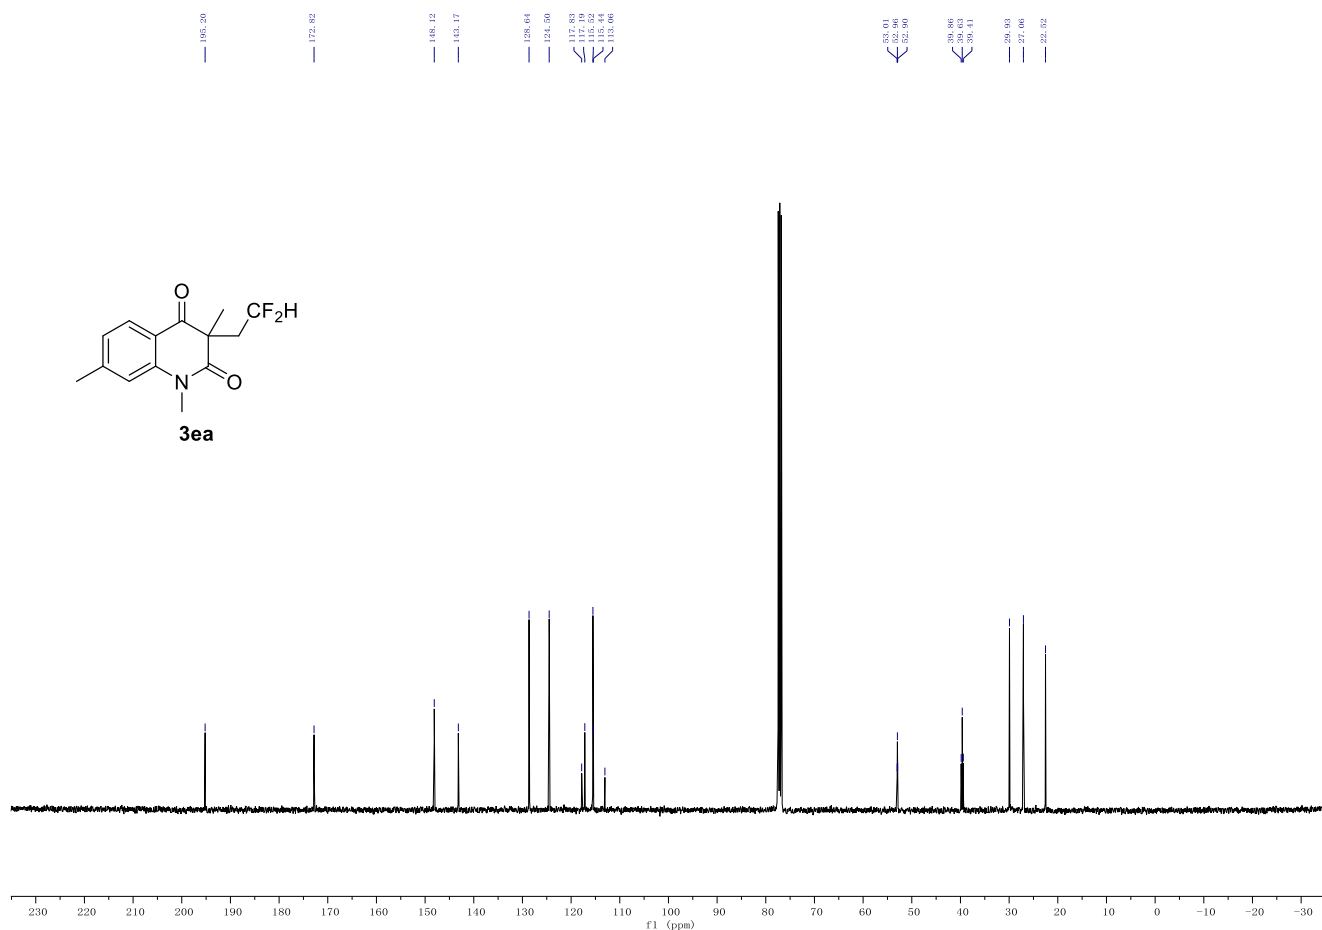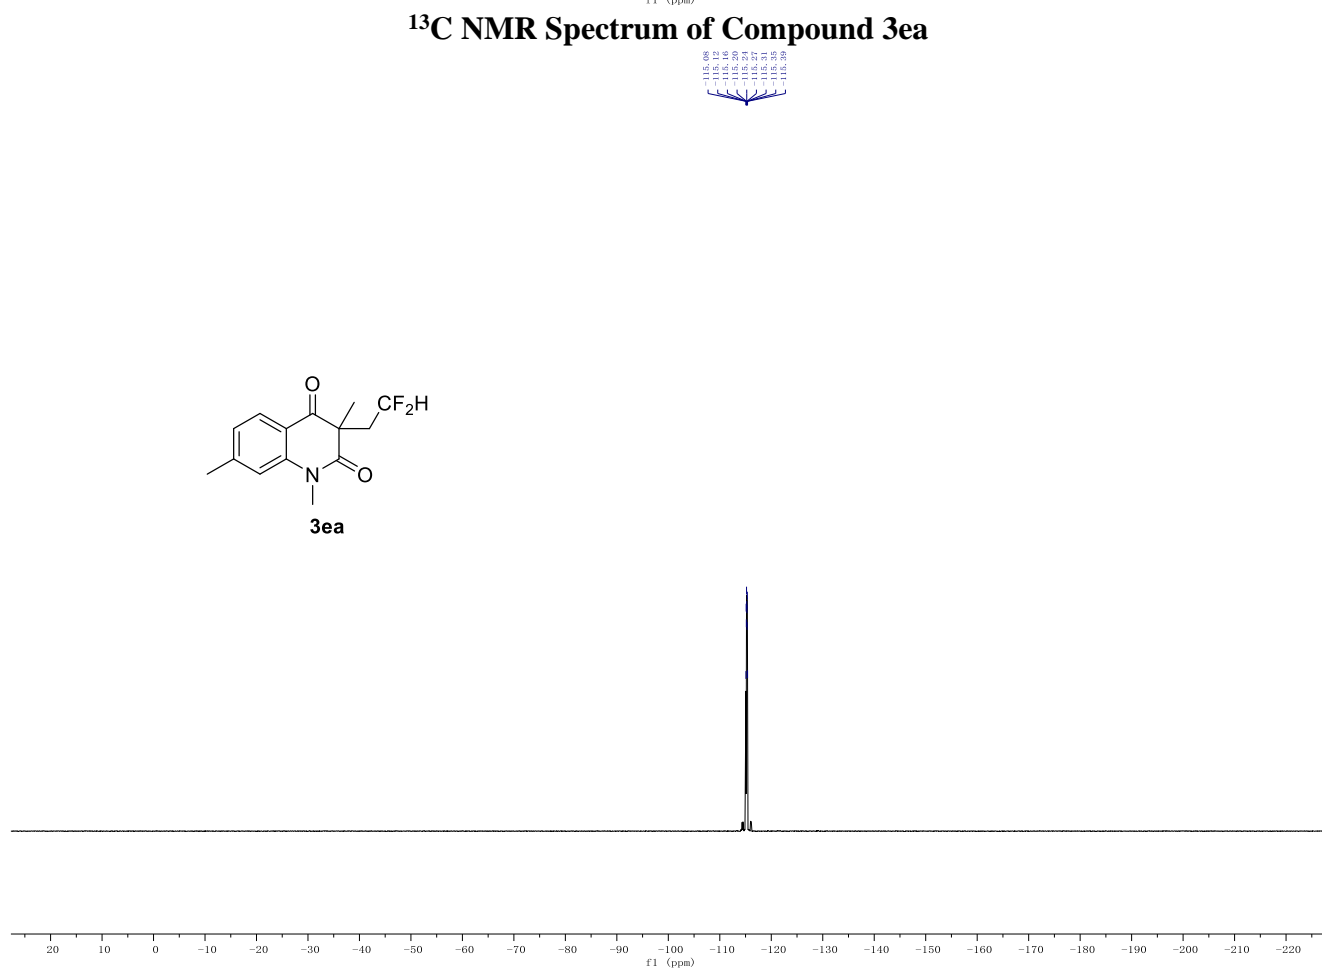

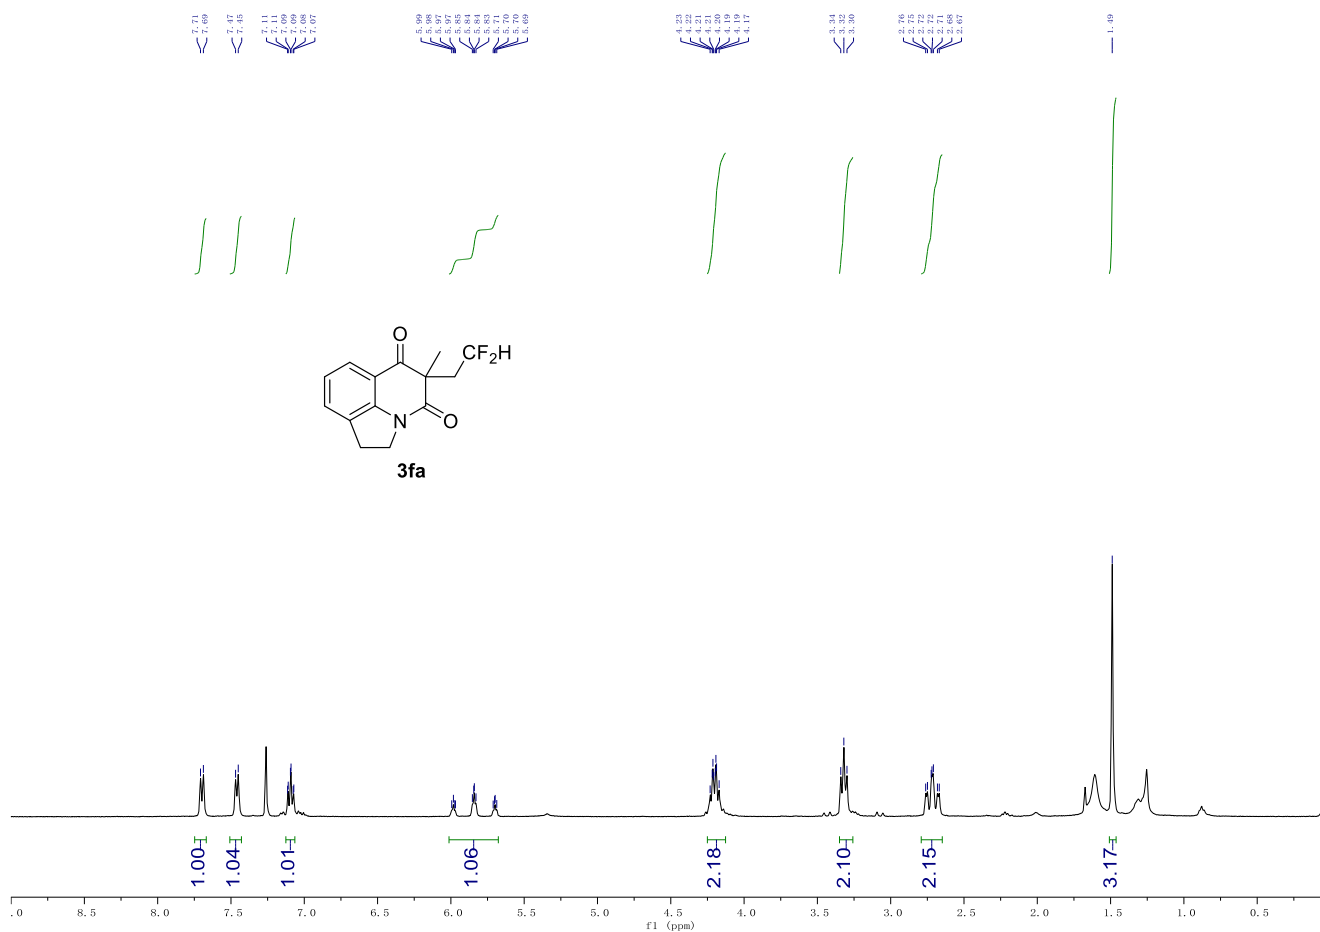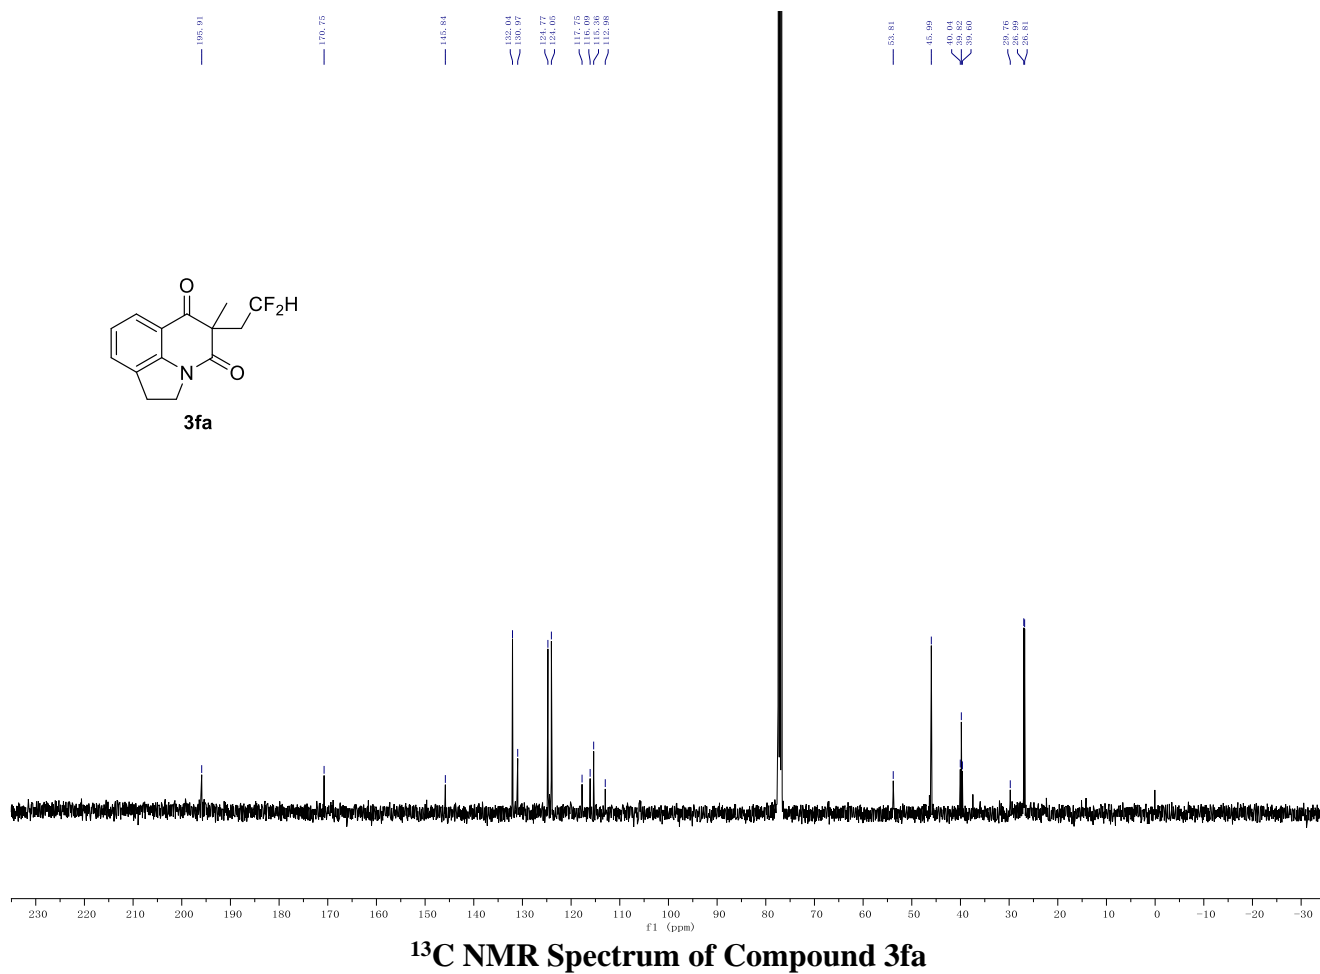



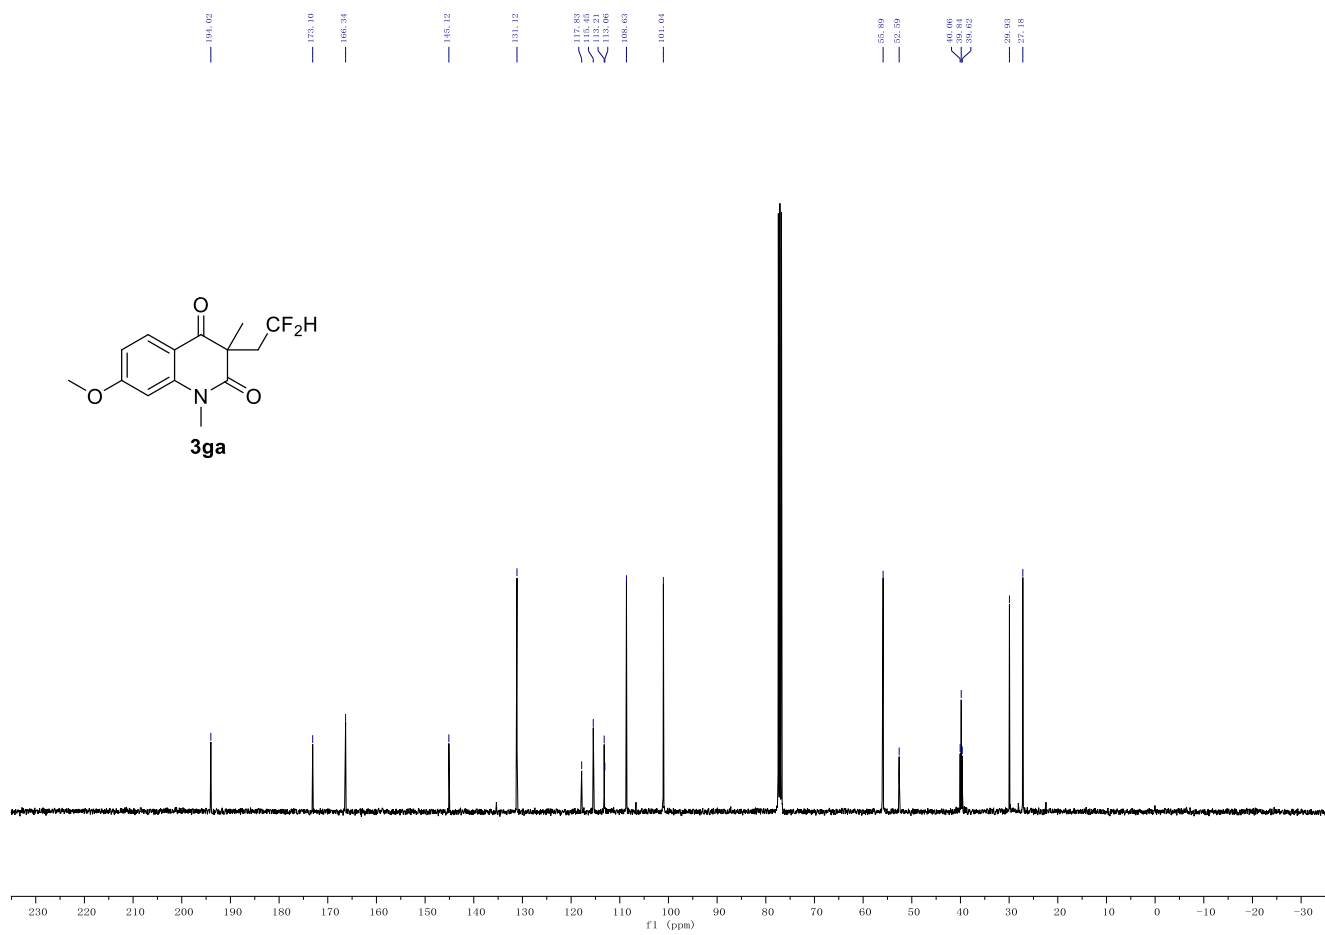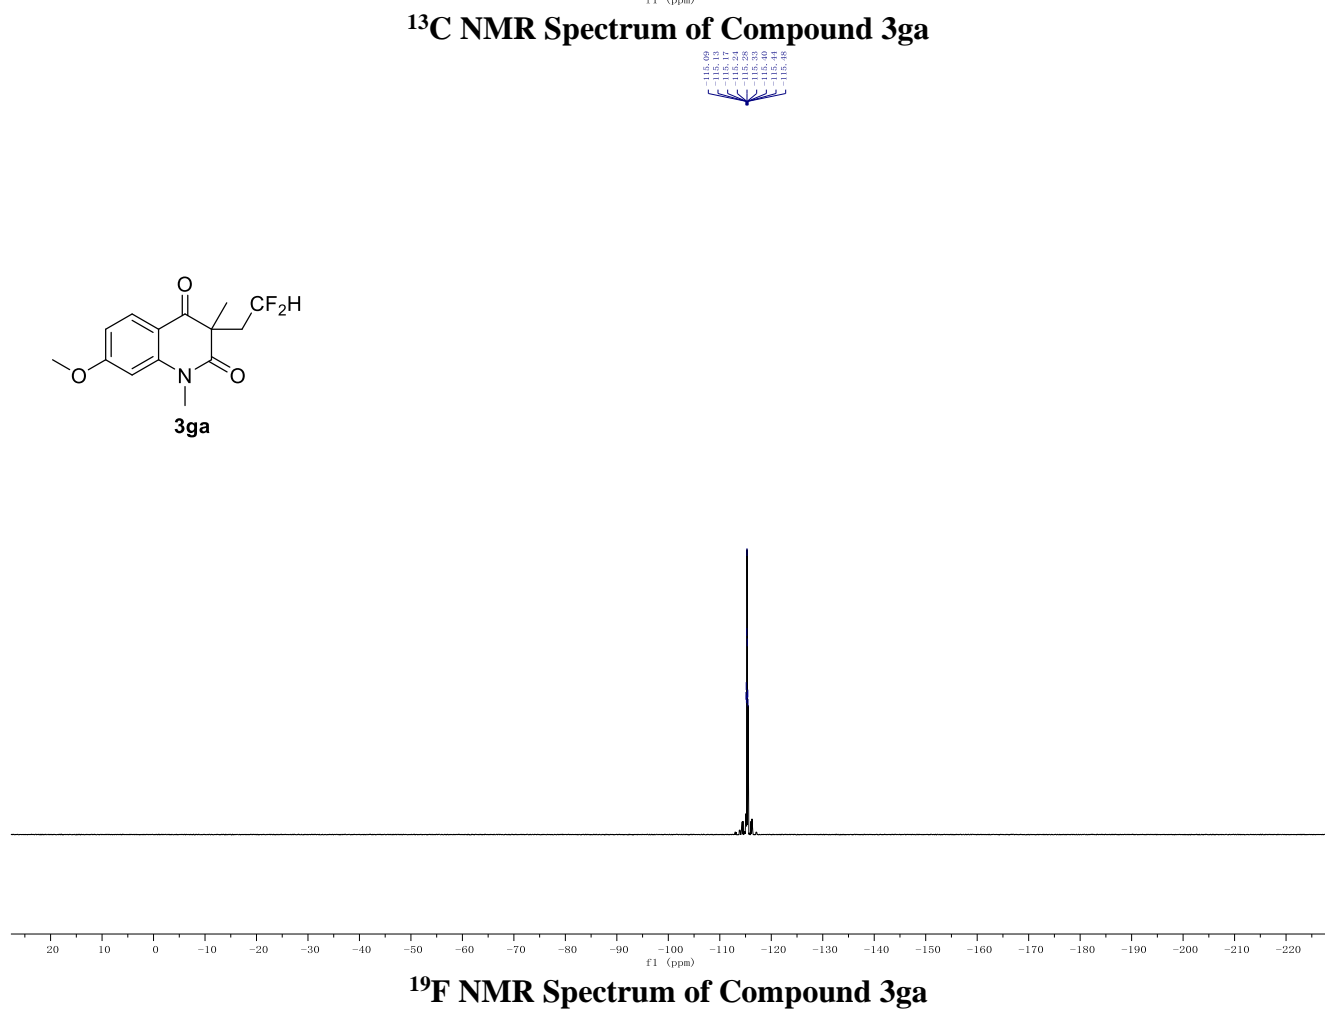

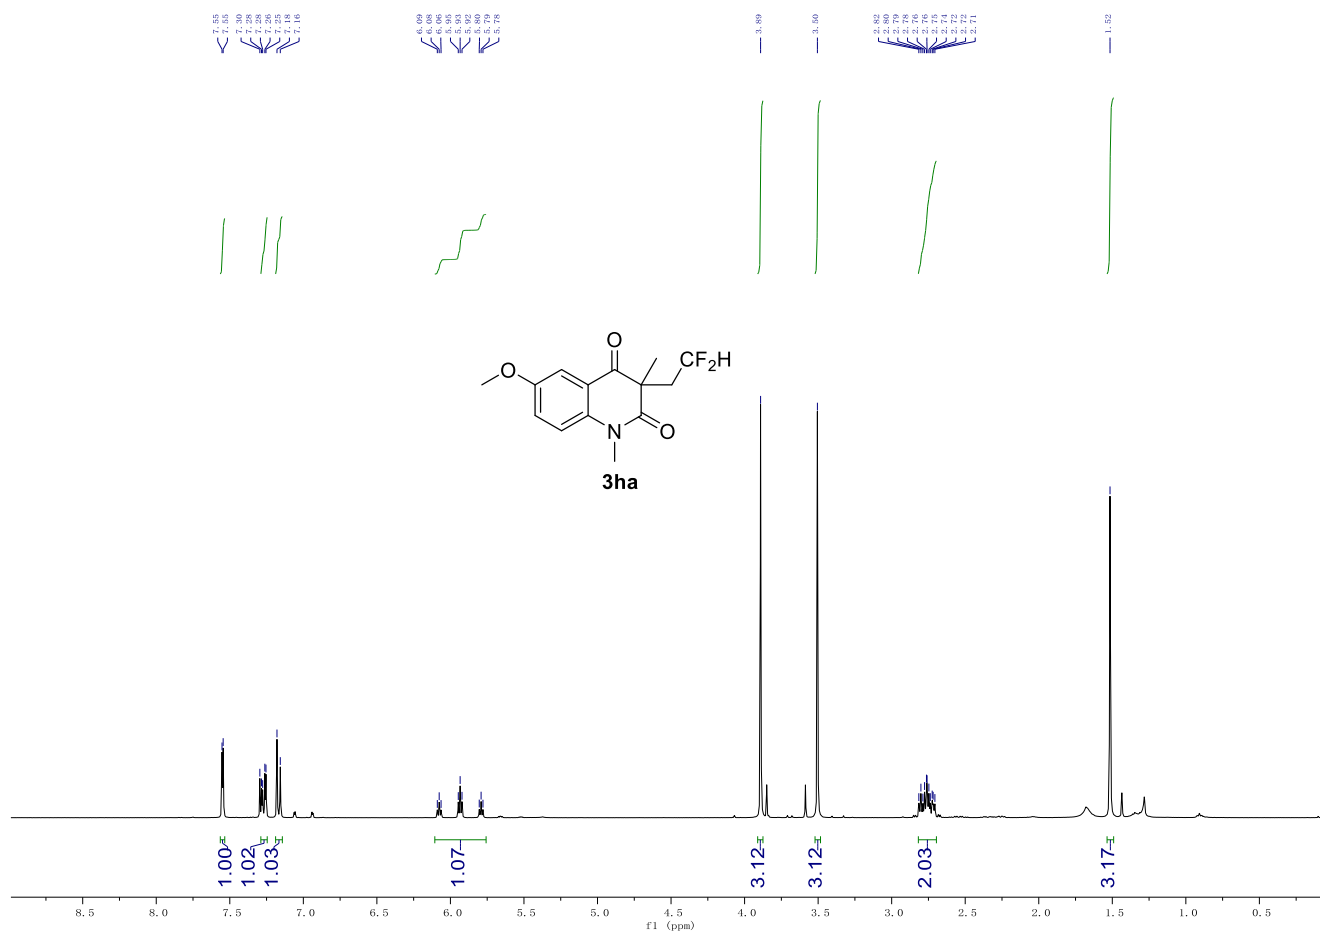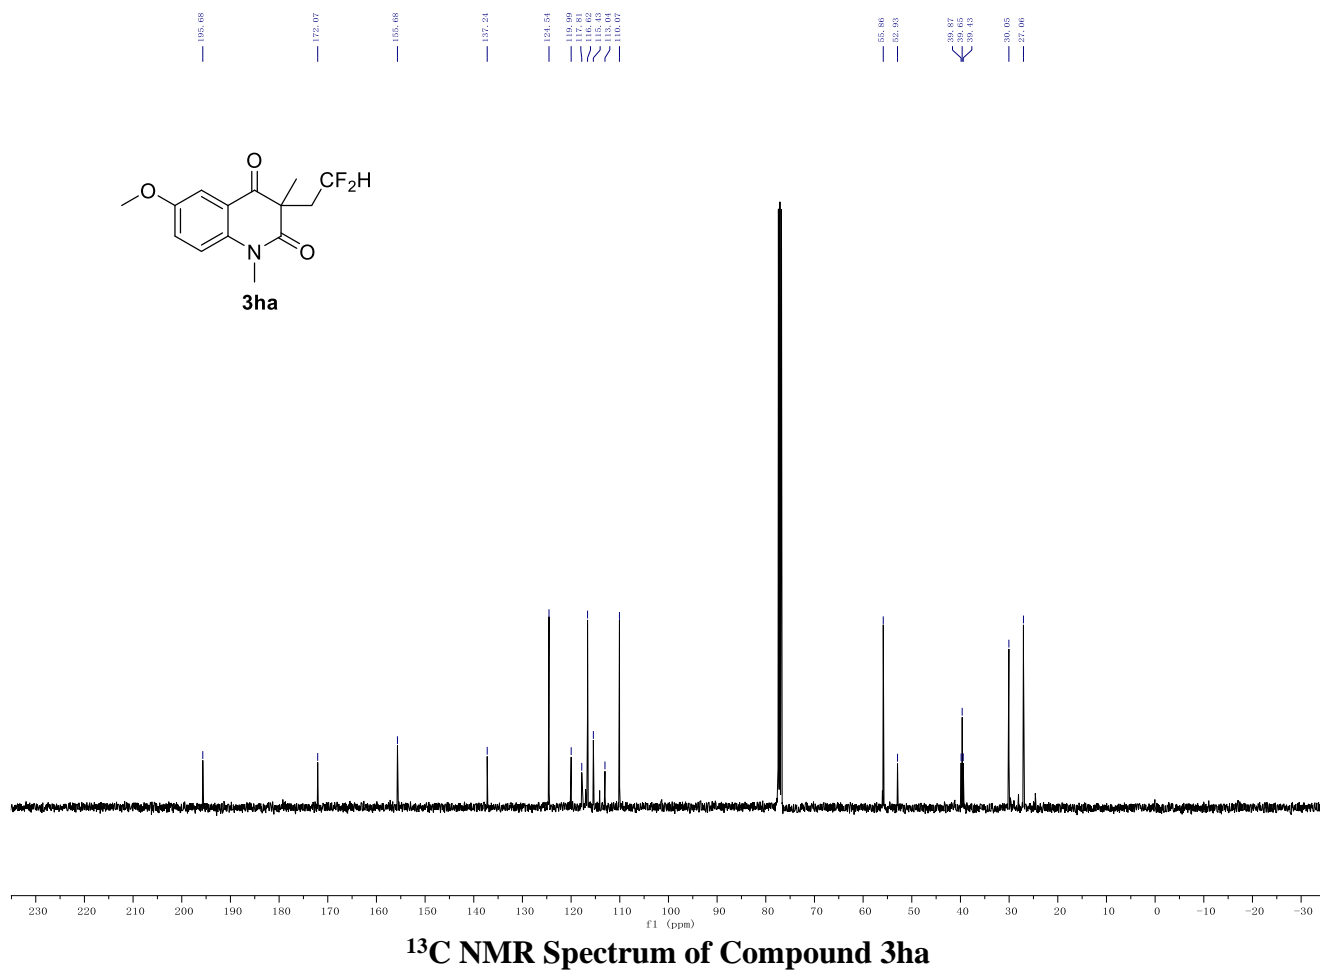

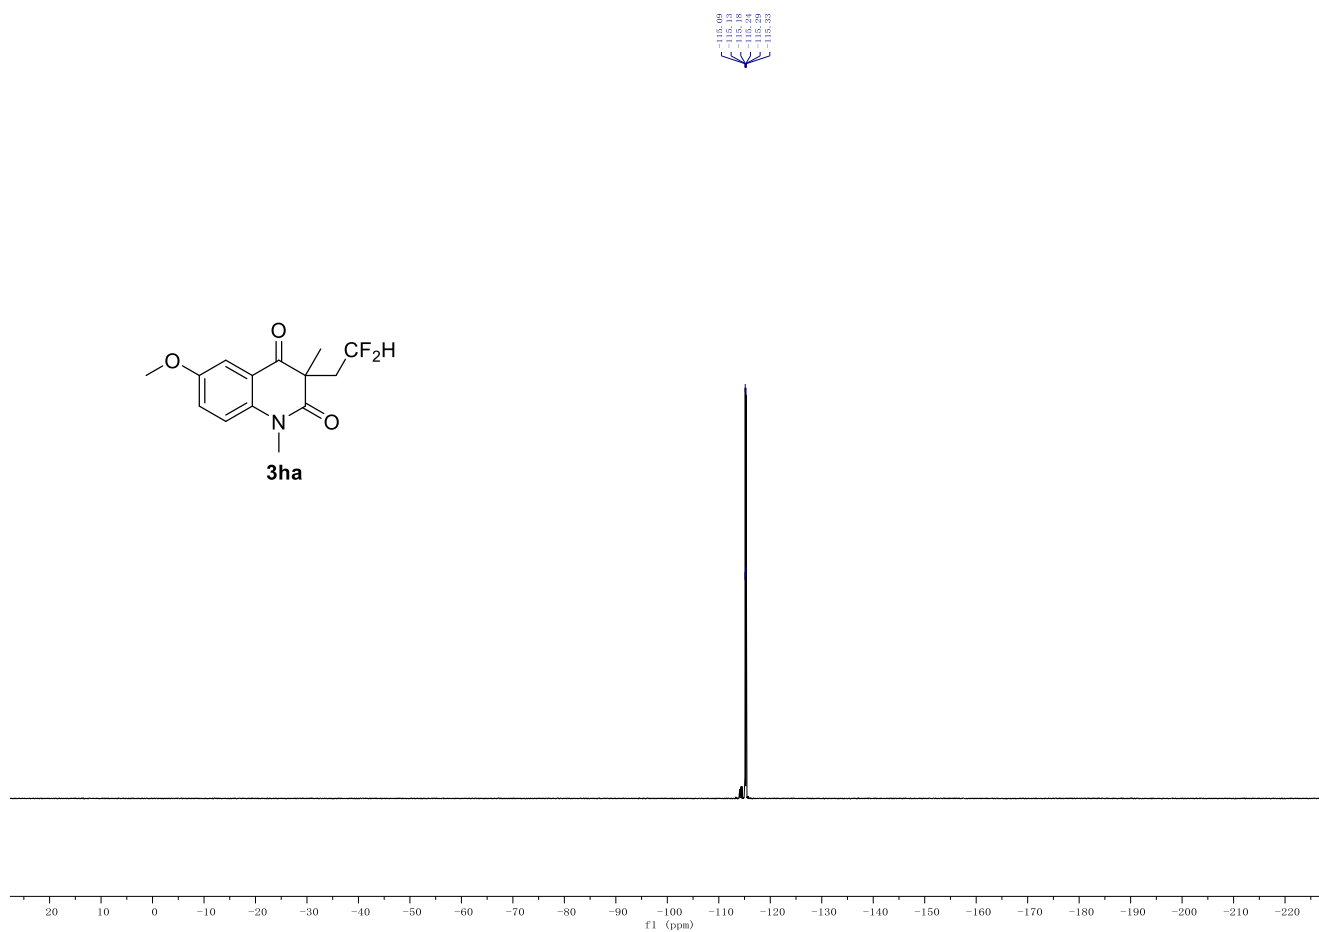

**<sup>19</sup>F NMR Spectrum of Compound 3ha**

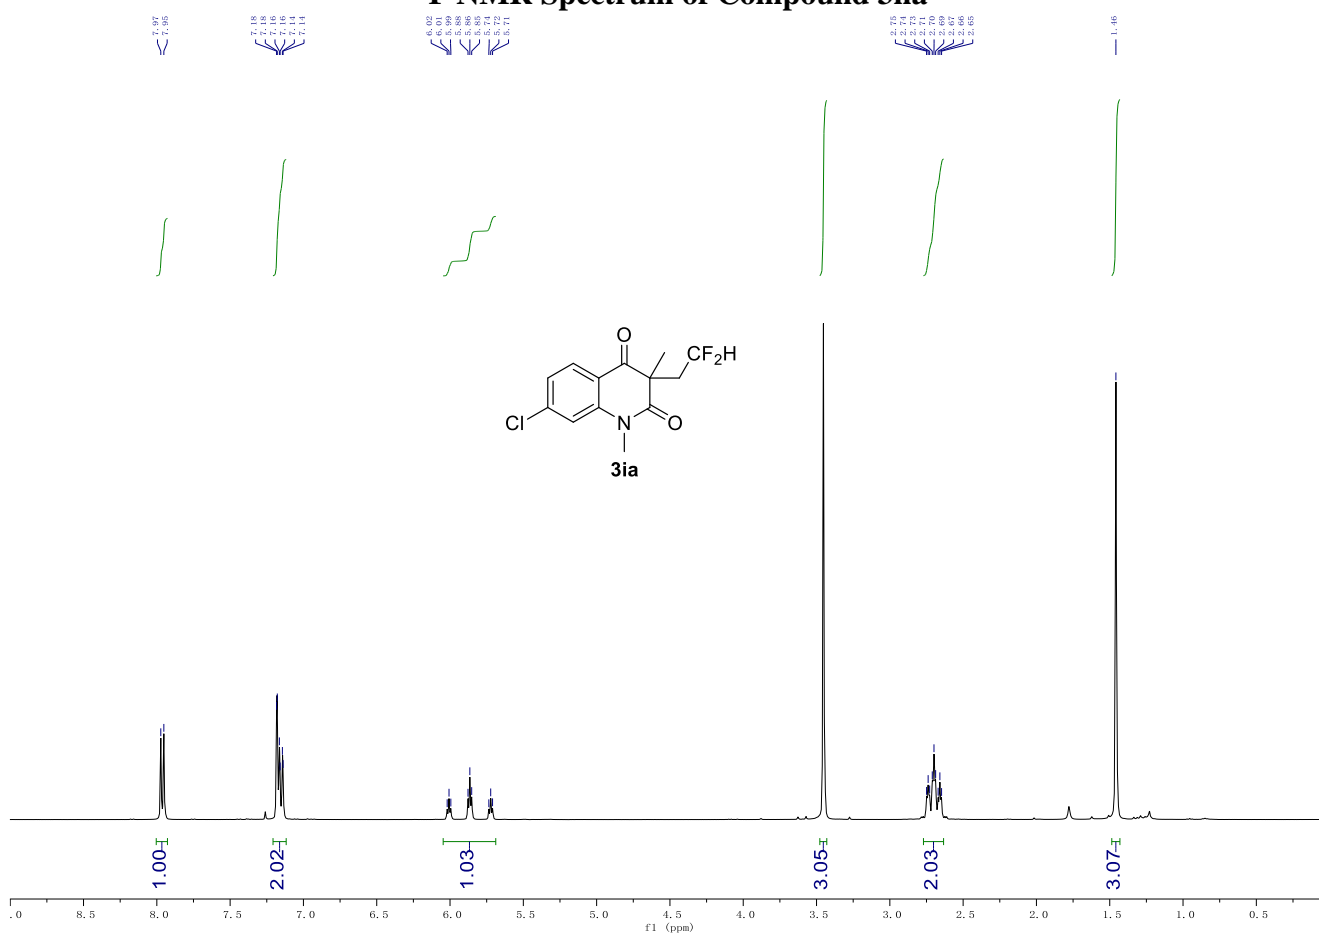

**<sup>1</sup>H NMR Spectrum of Compound 3ia**

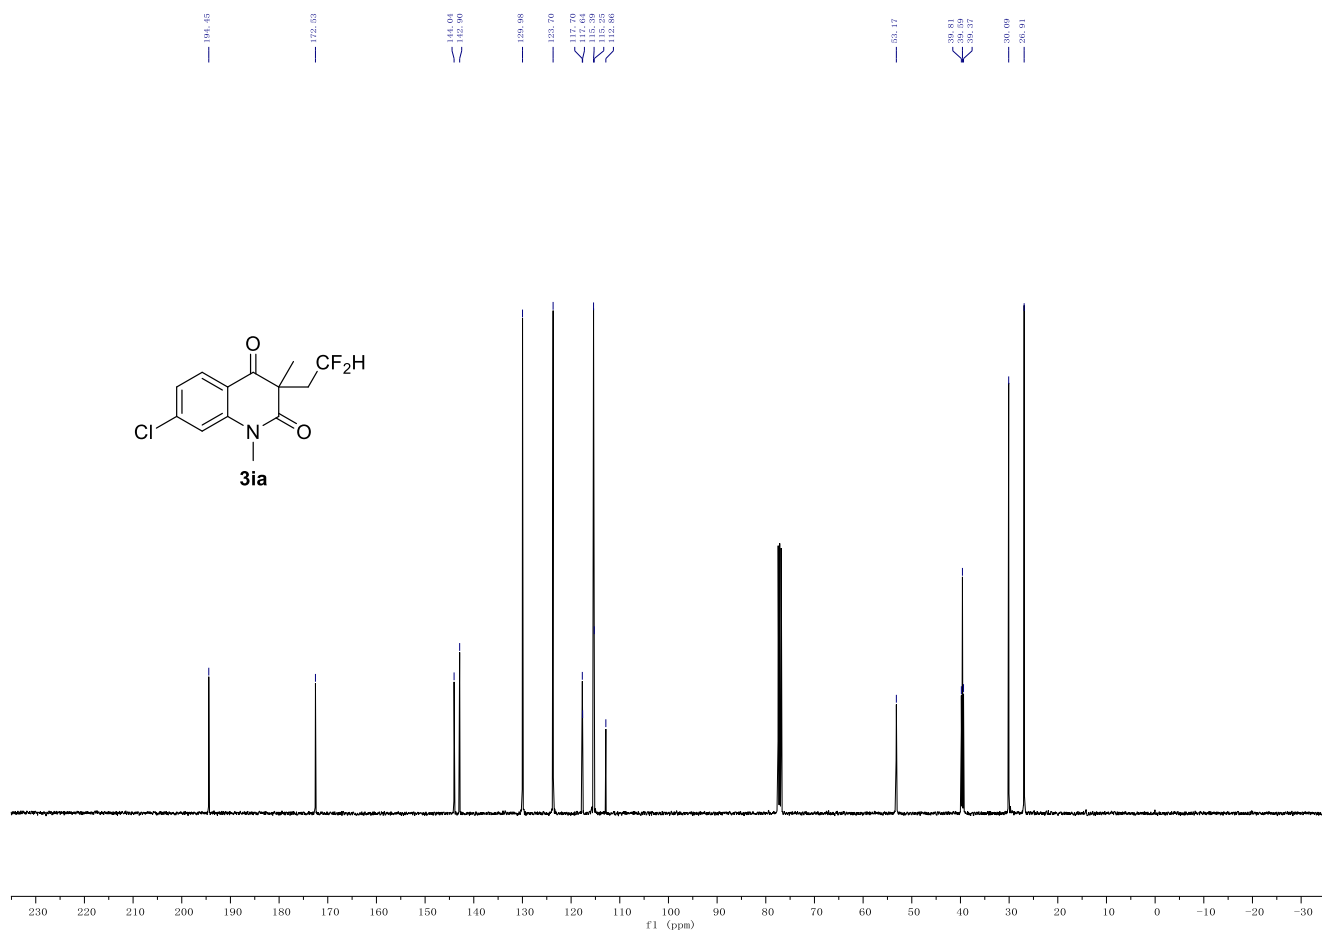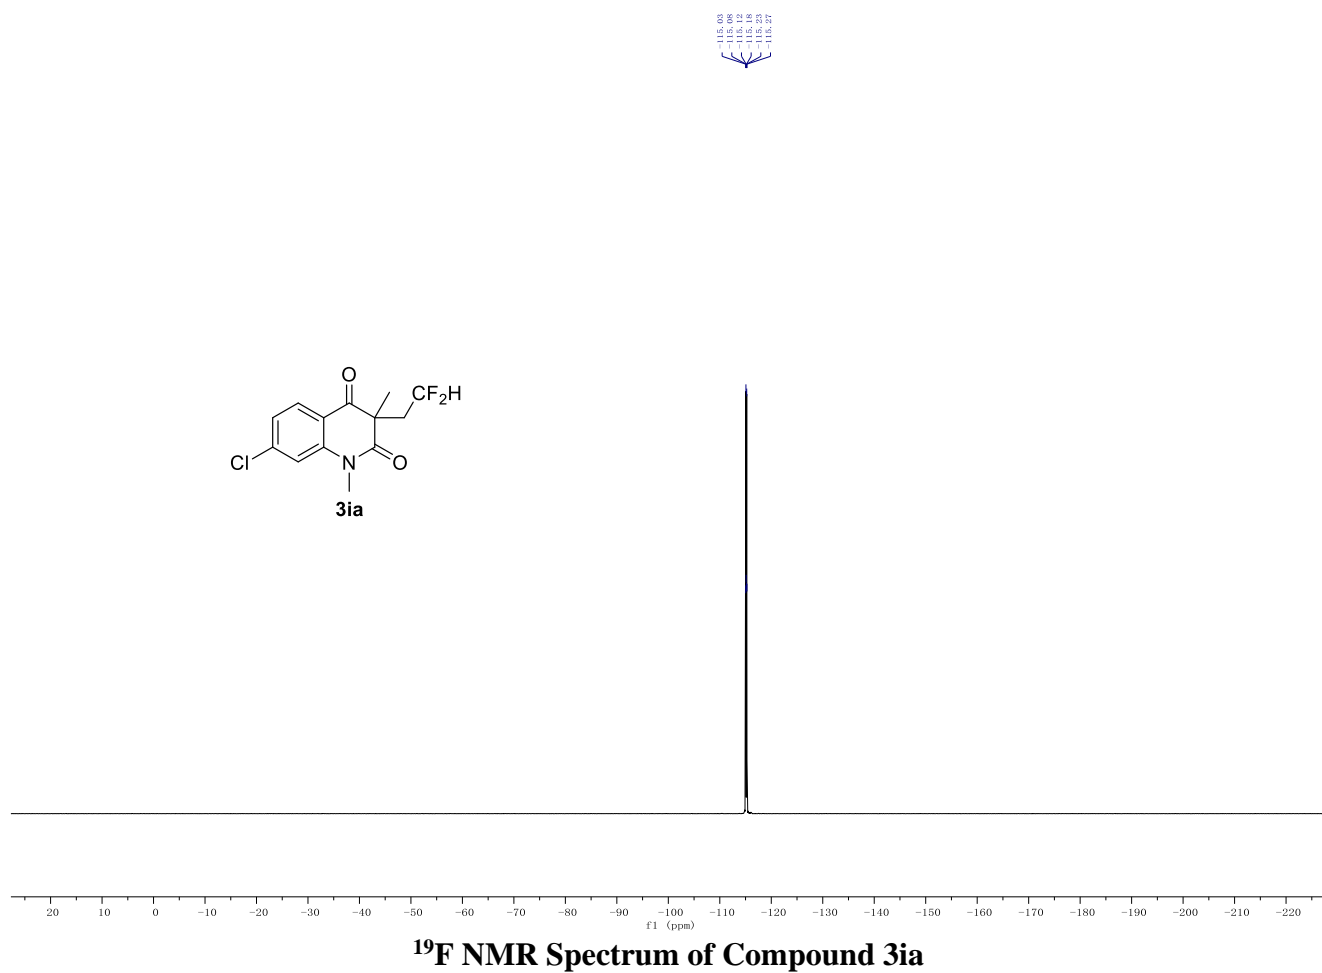

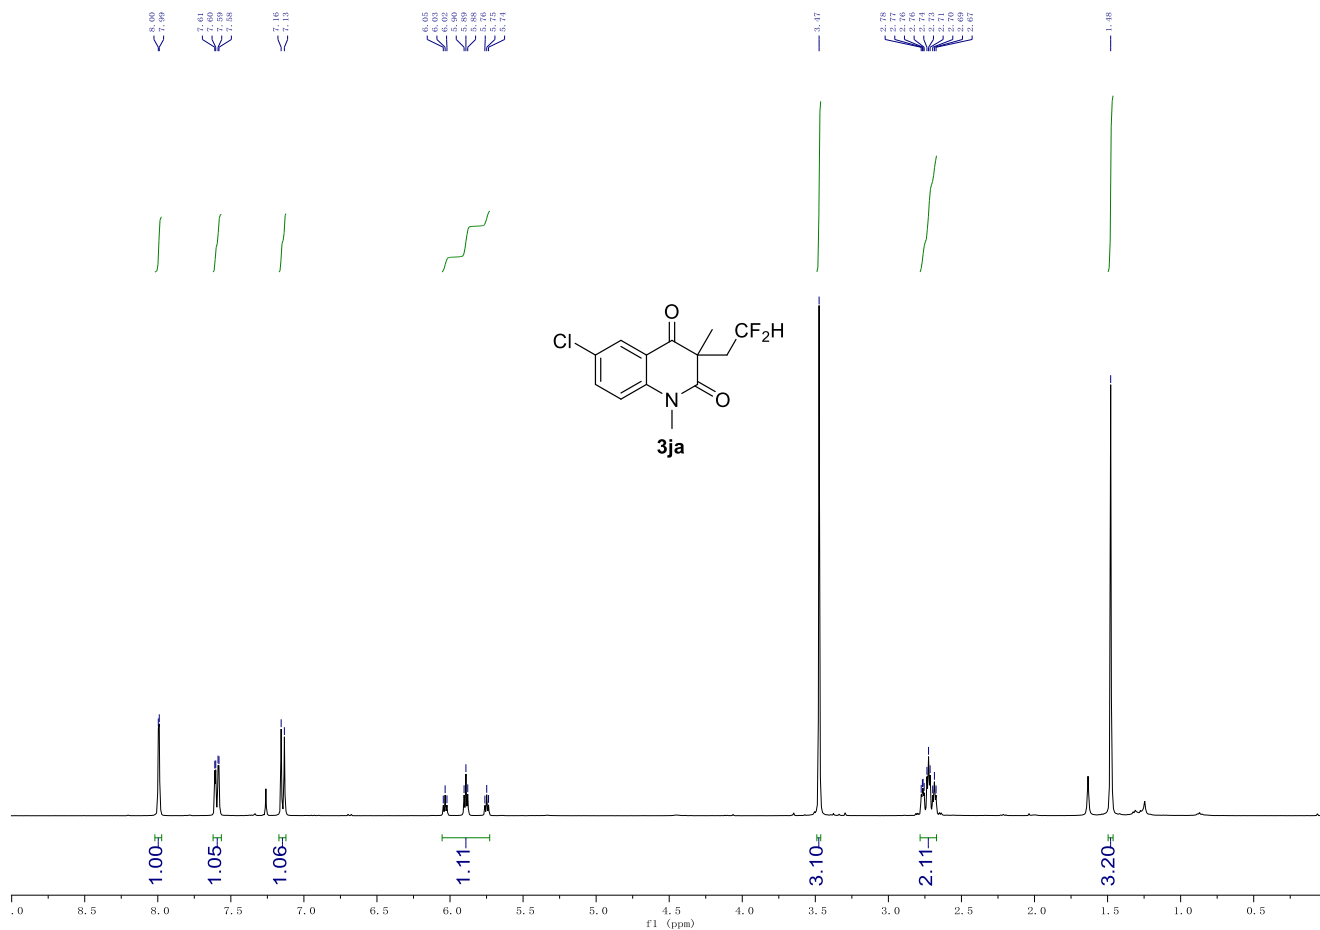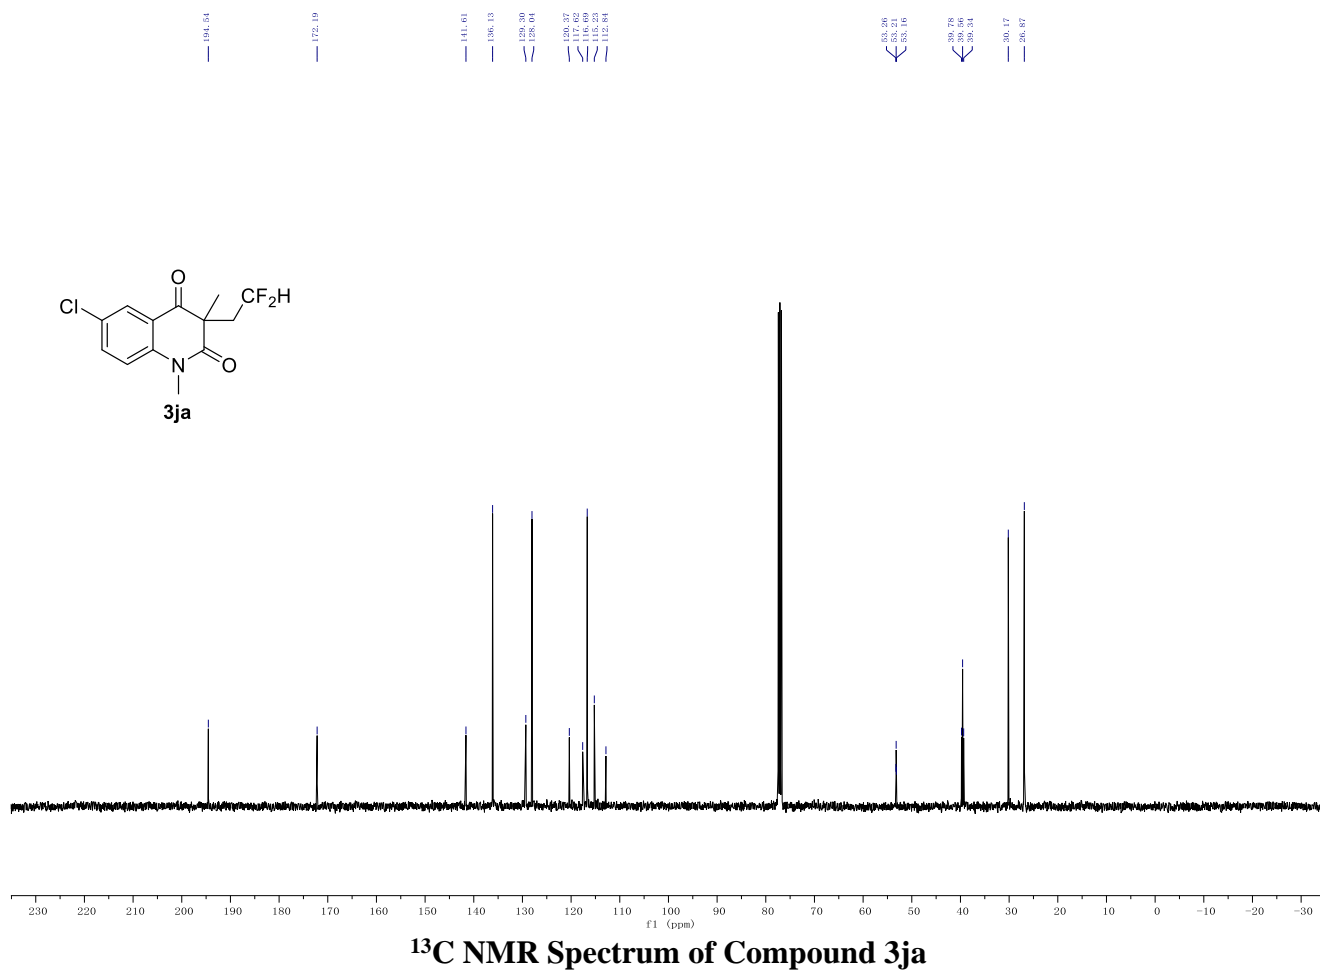

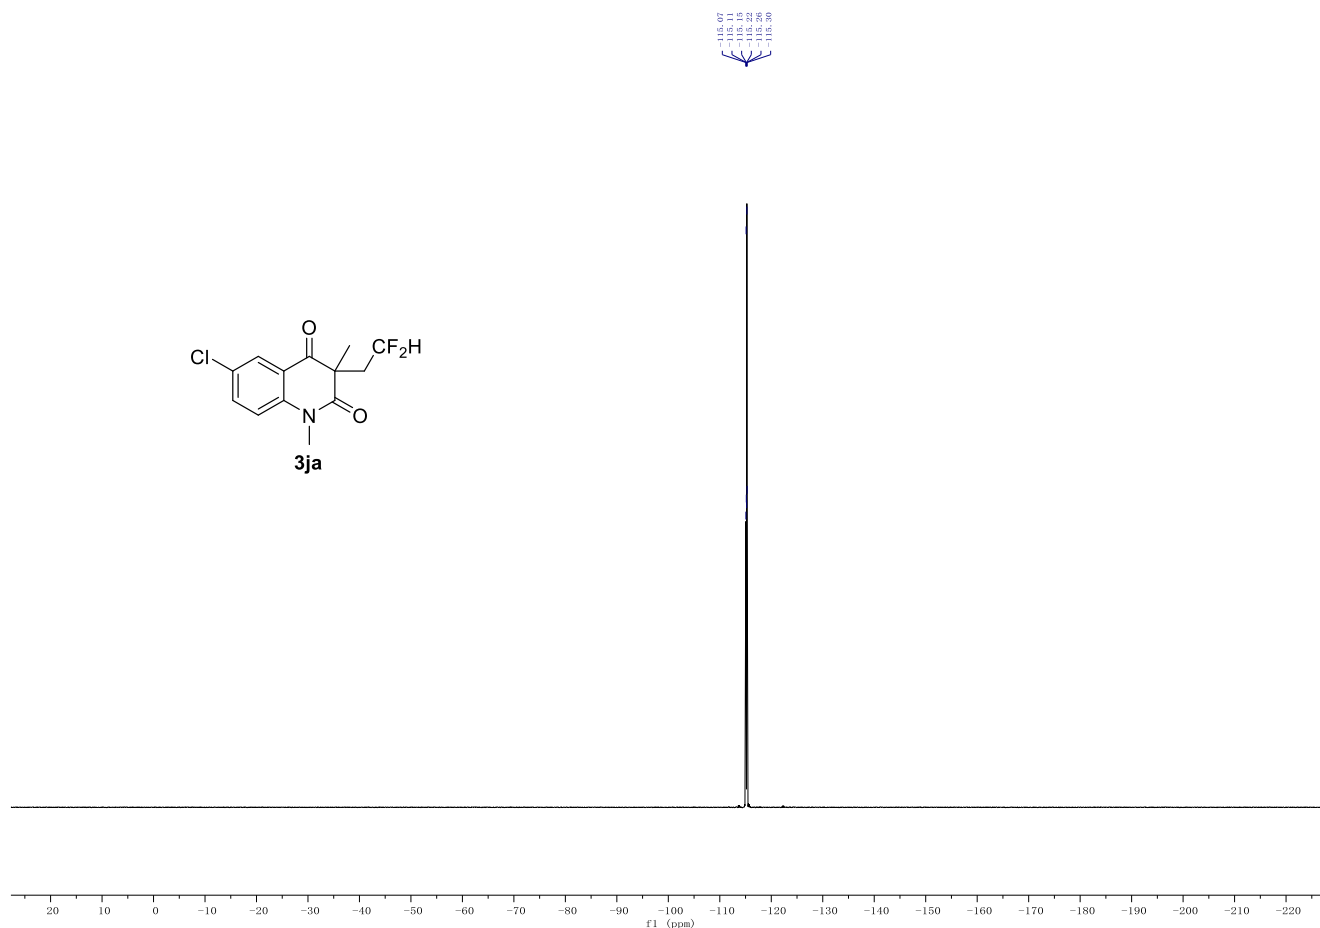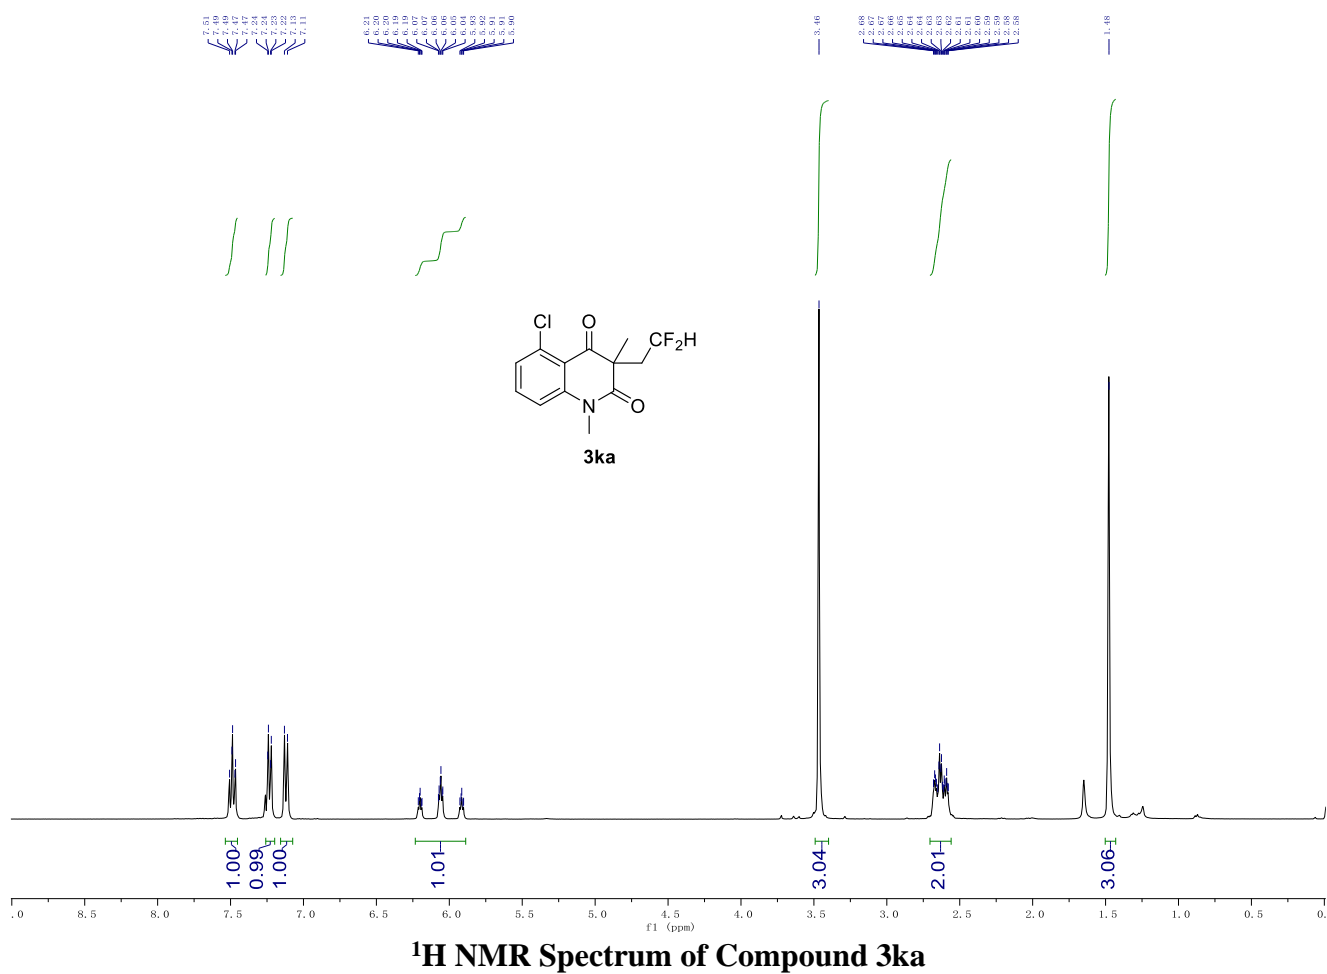

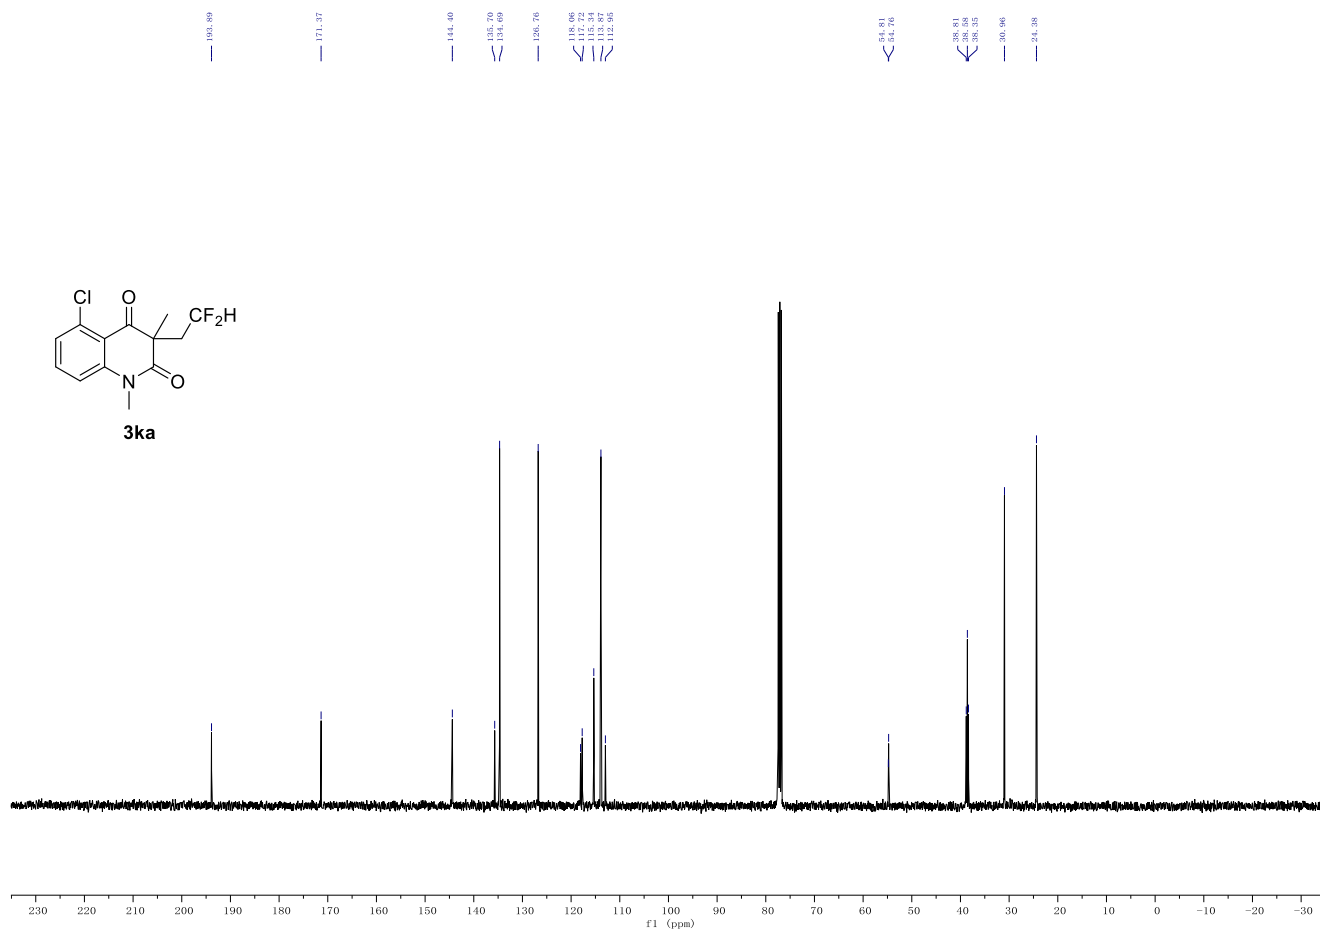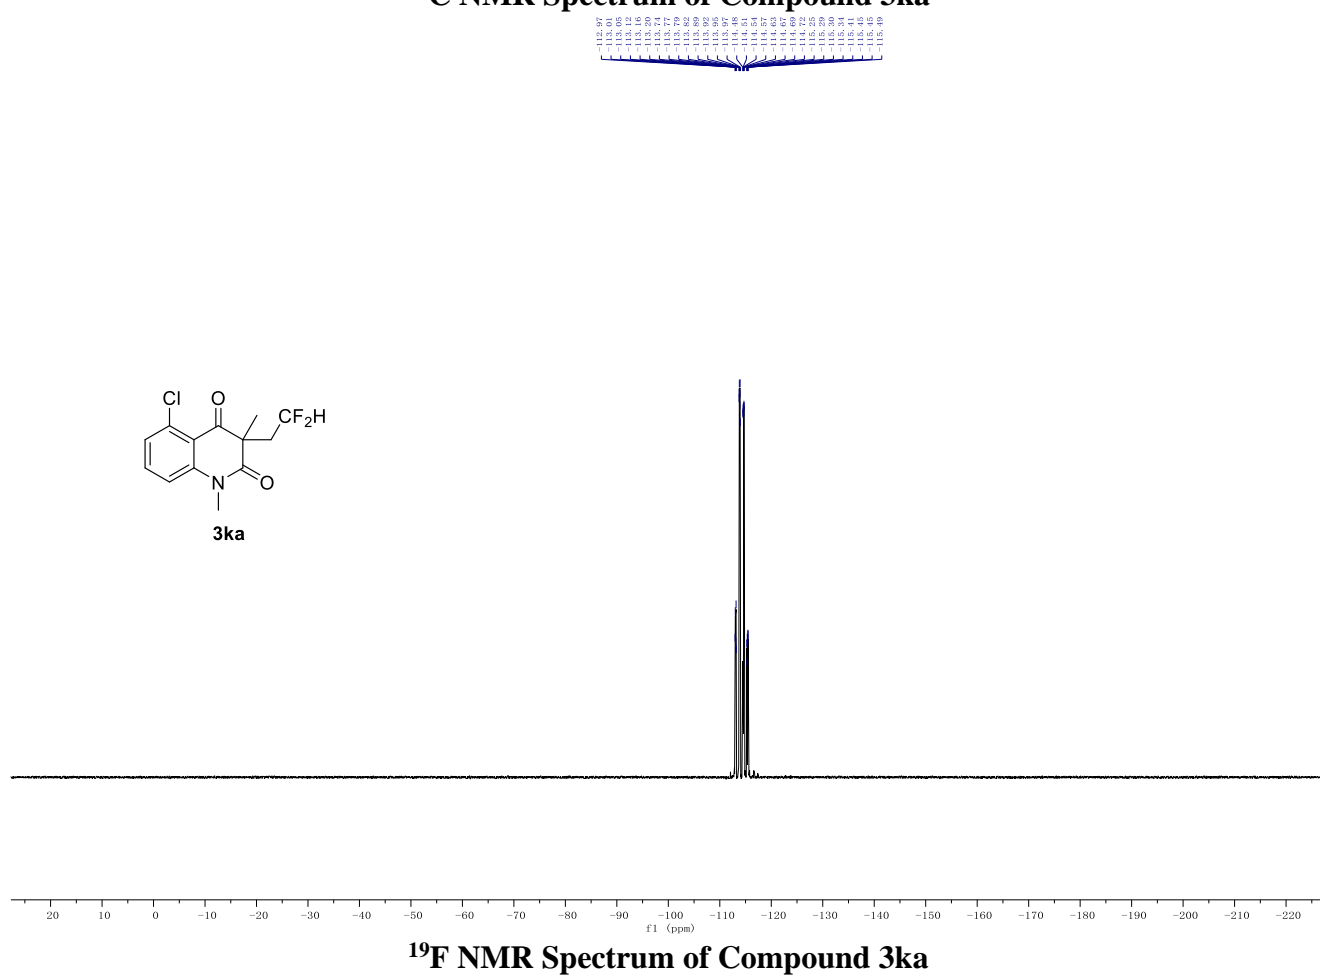

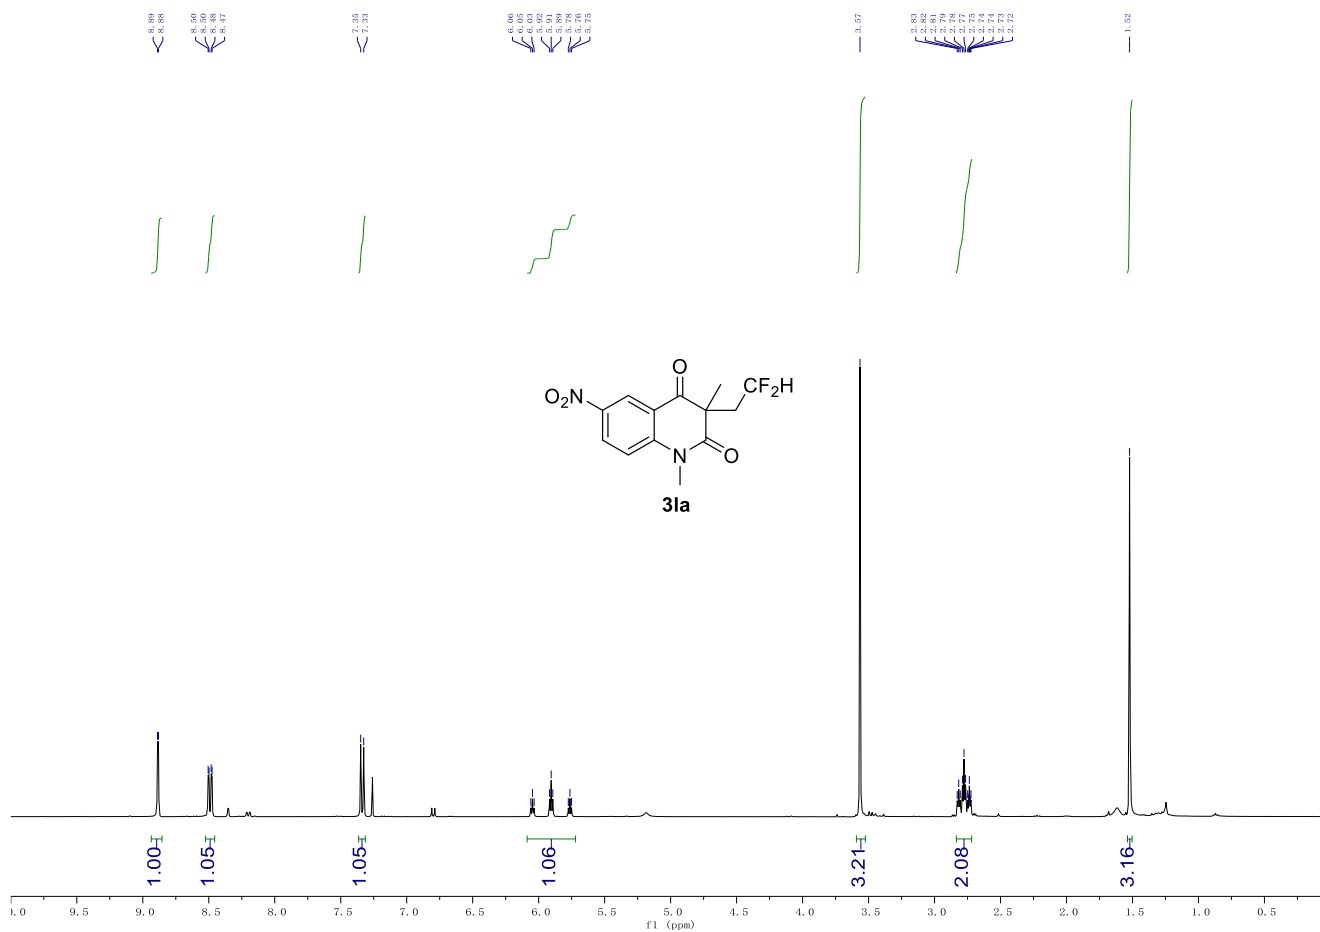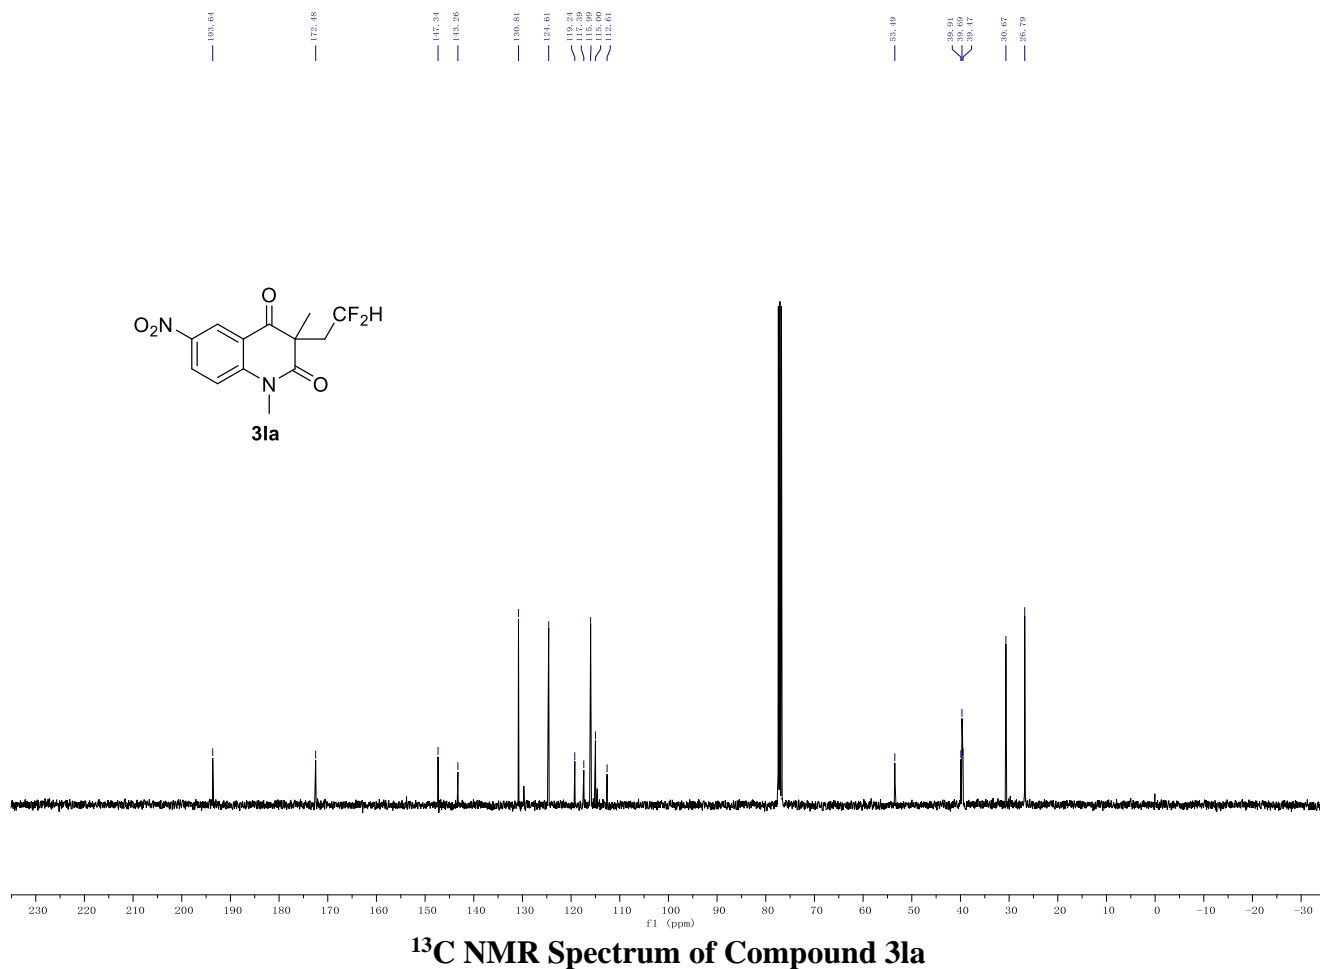

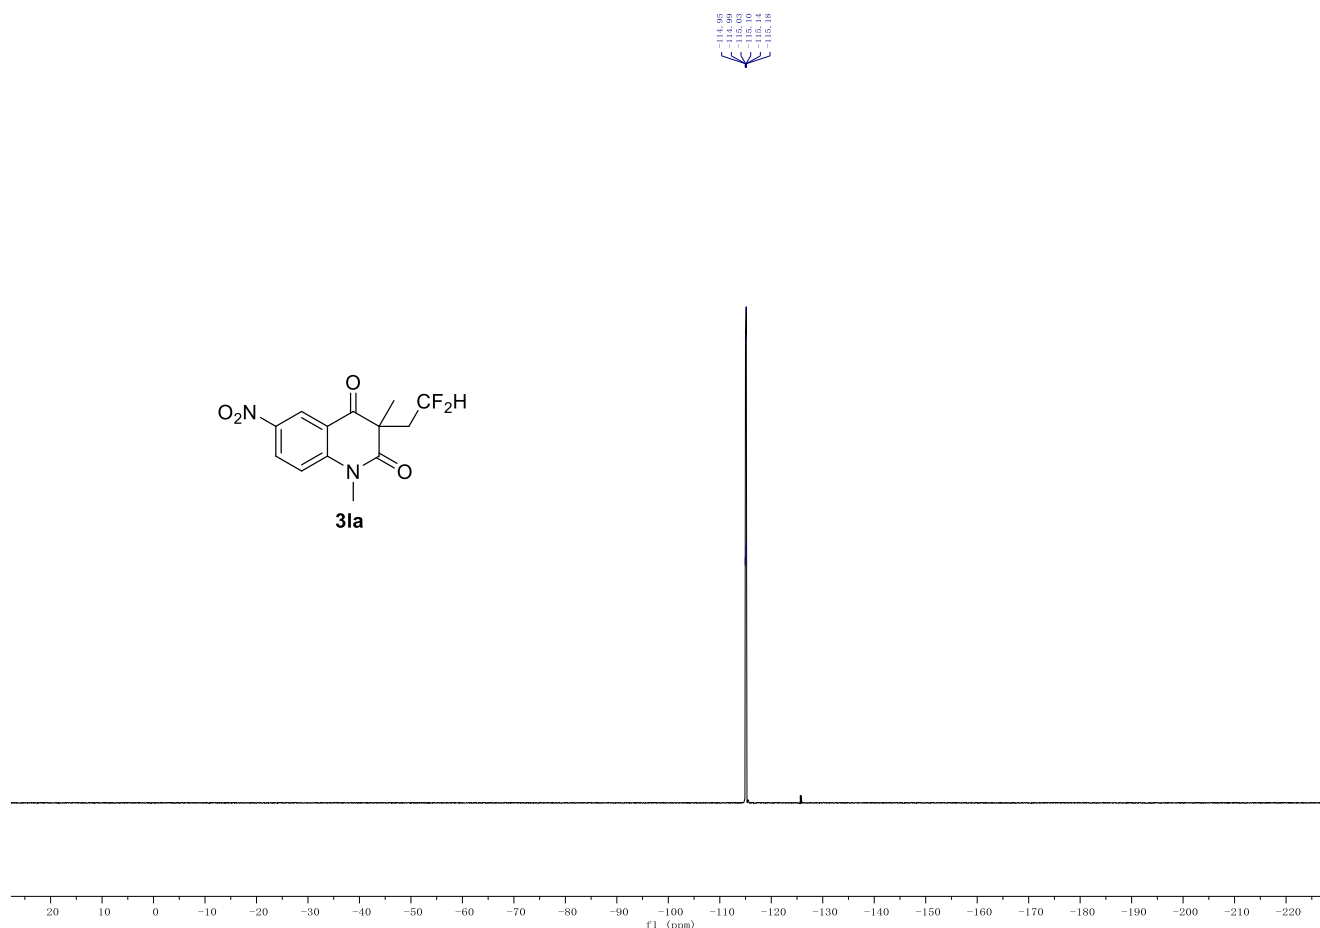

**<sup>19</sup>F NMR Spectrum of Compound 3la**

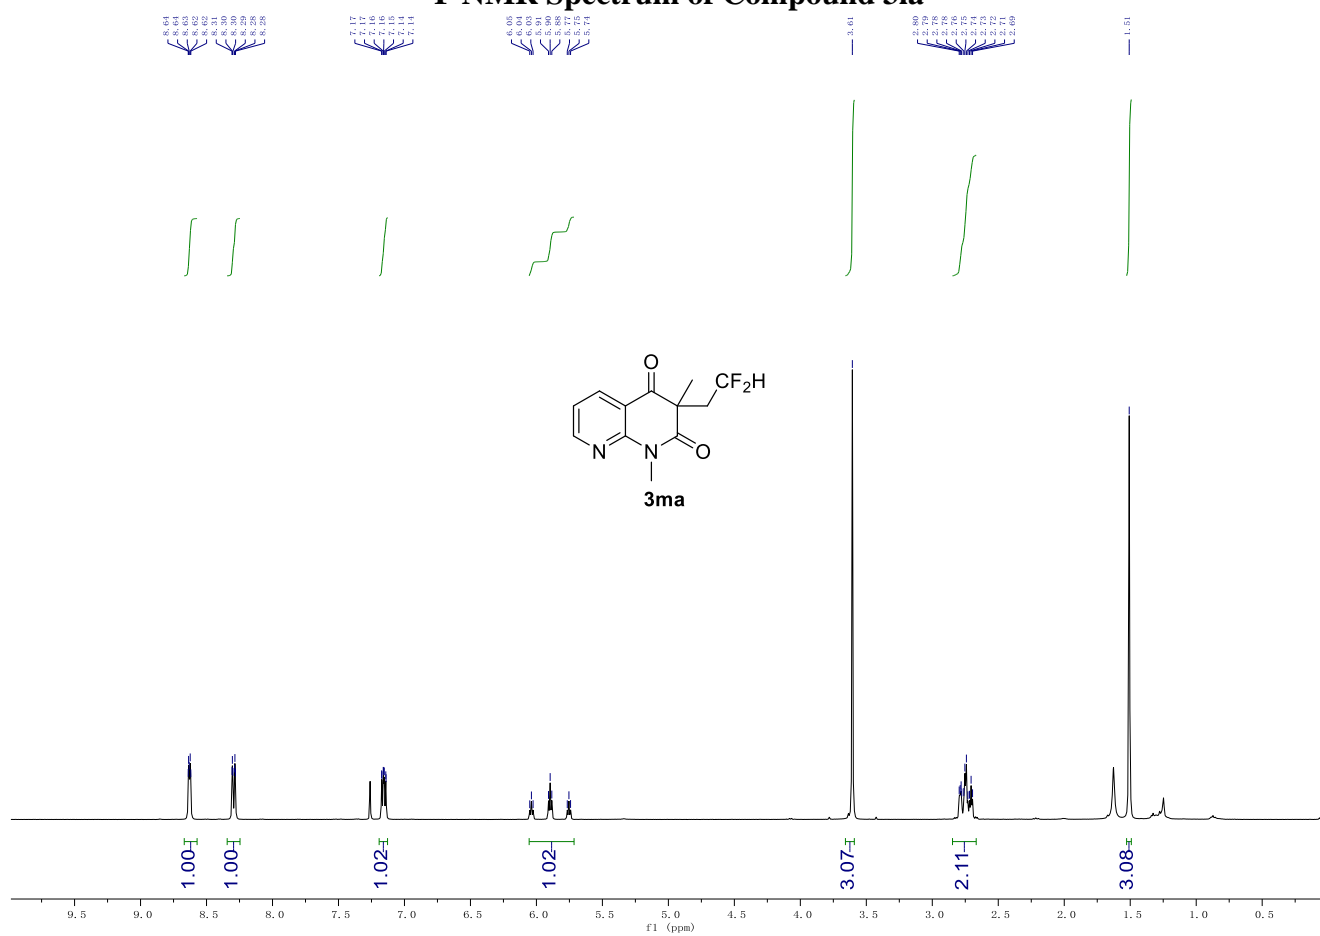

**<sup>1</sup>H NMR Spectrum of Compound 3ma**

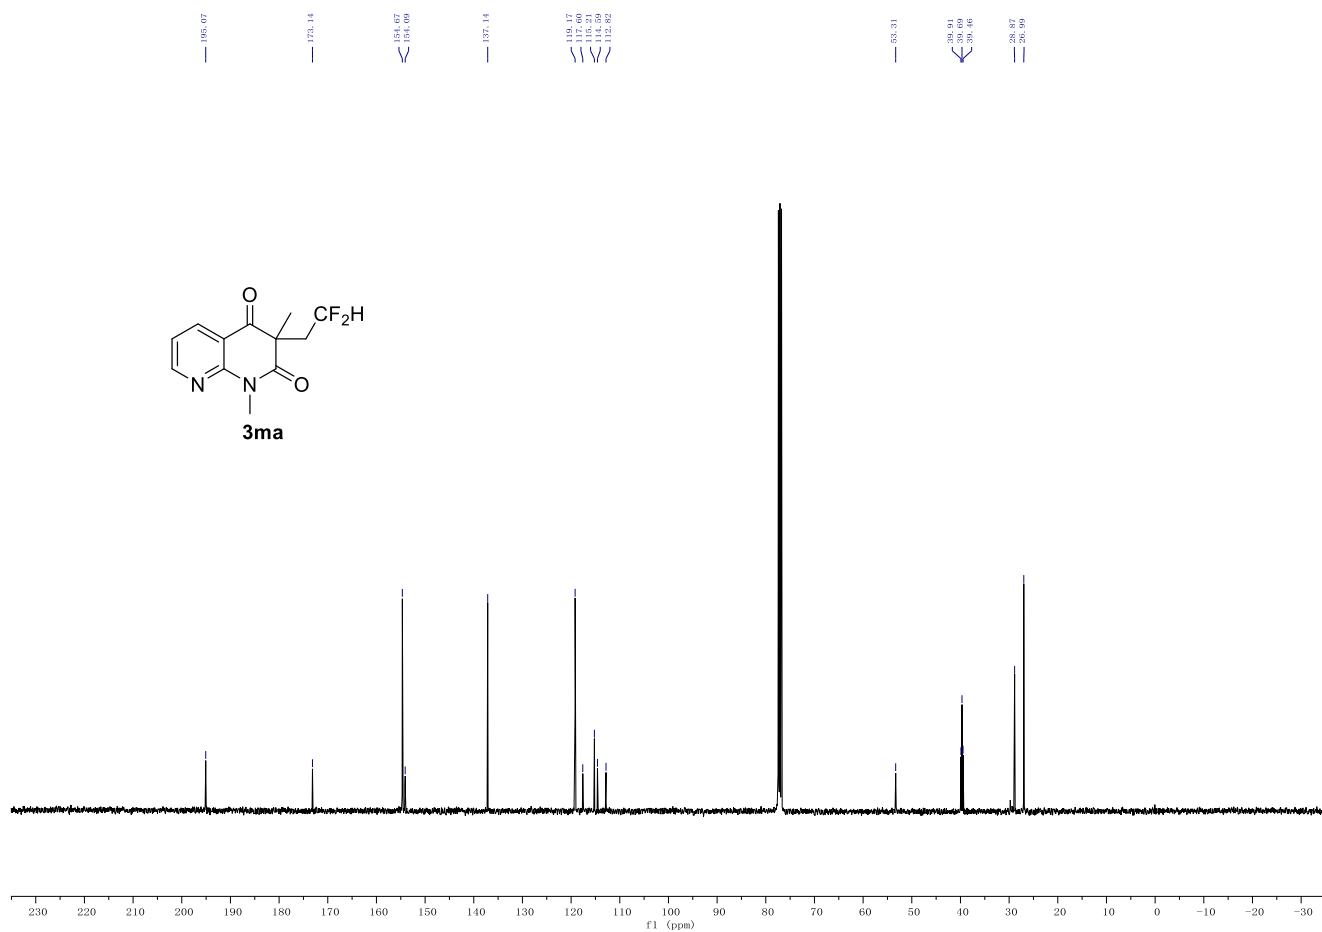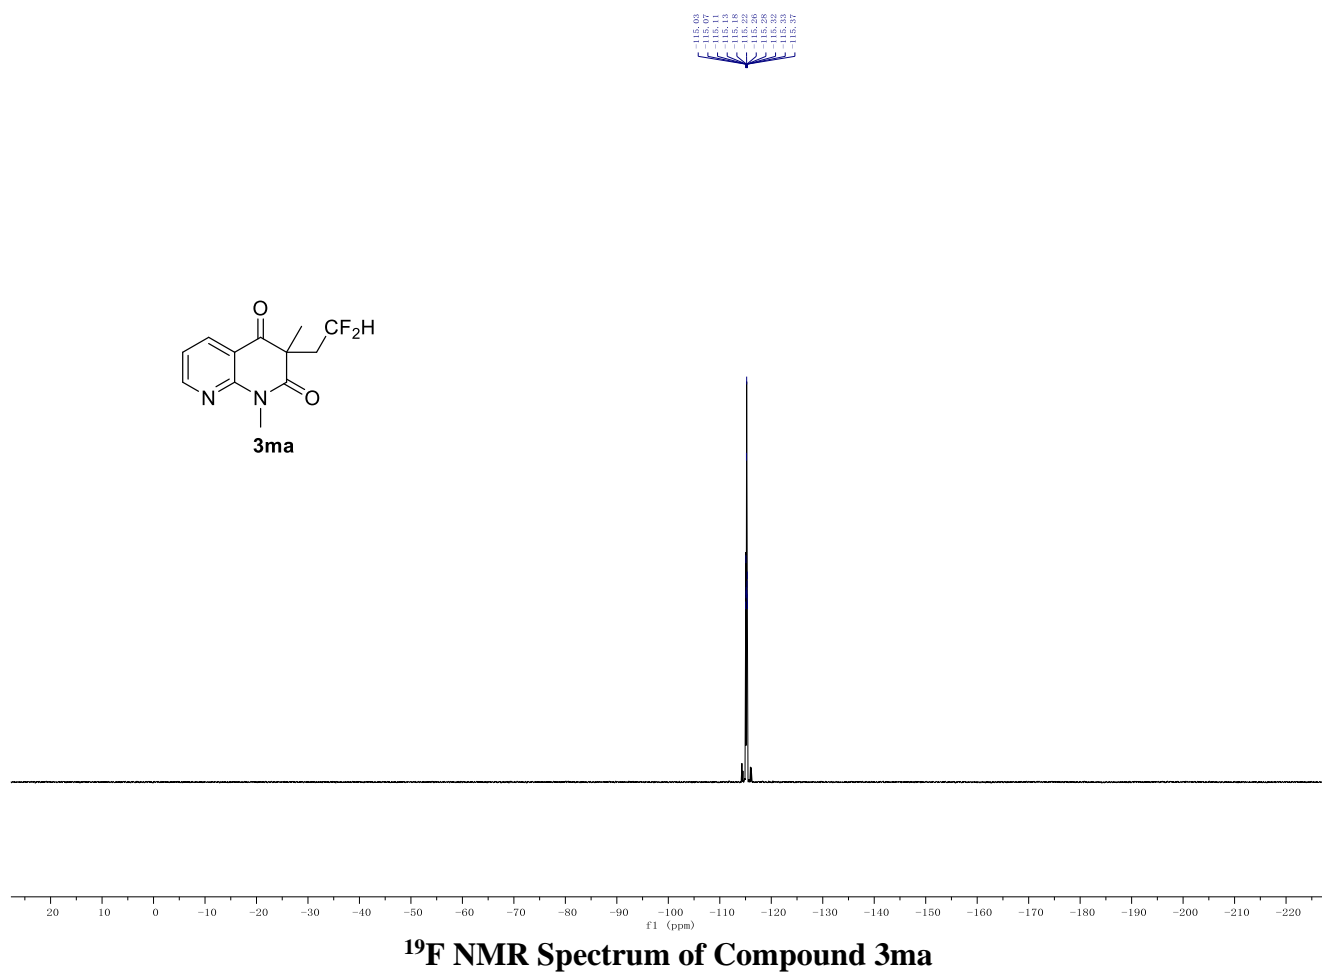

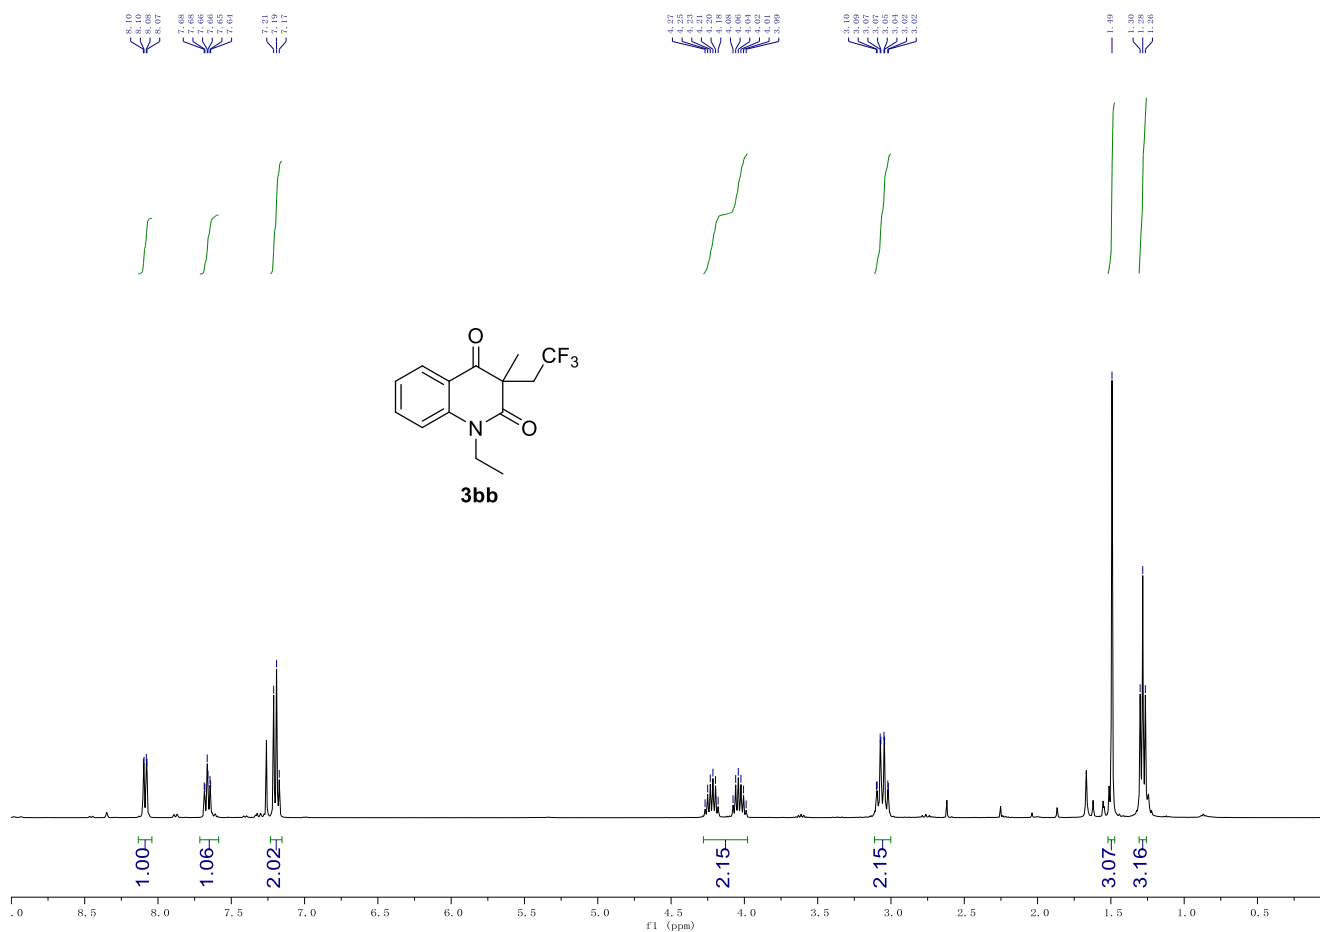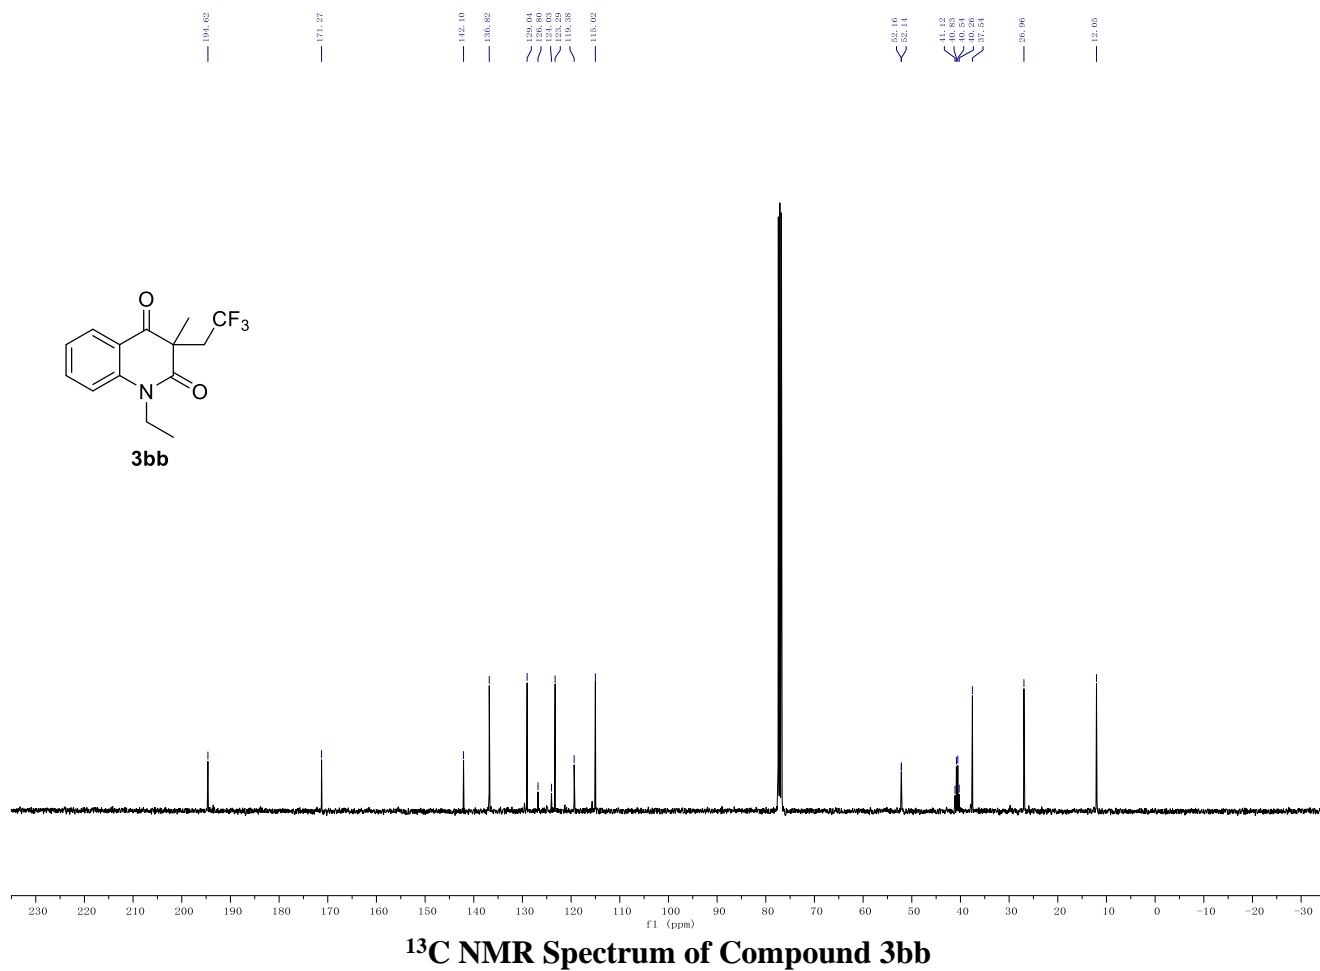

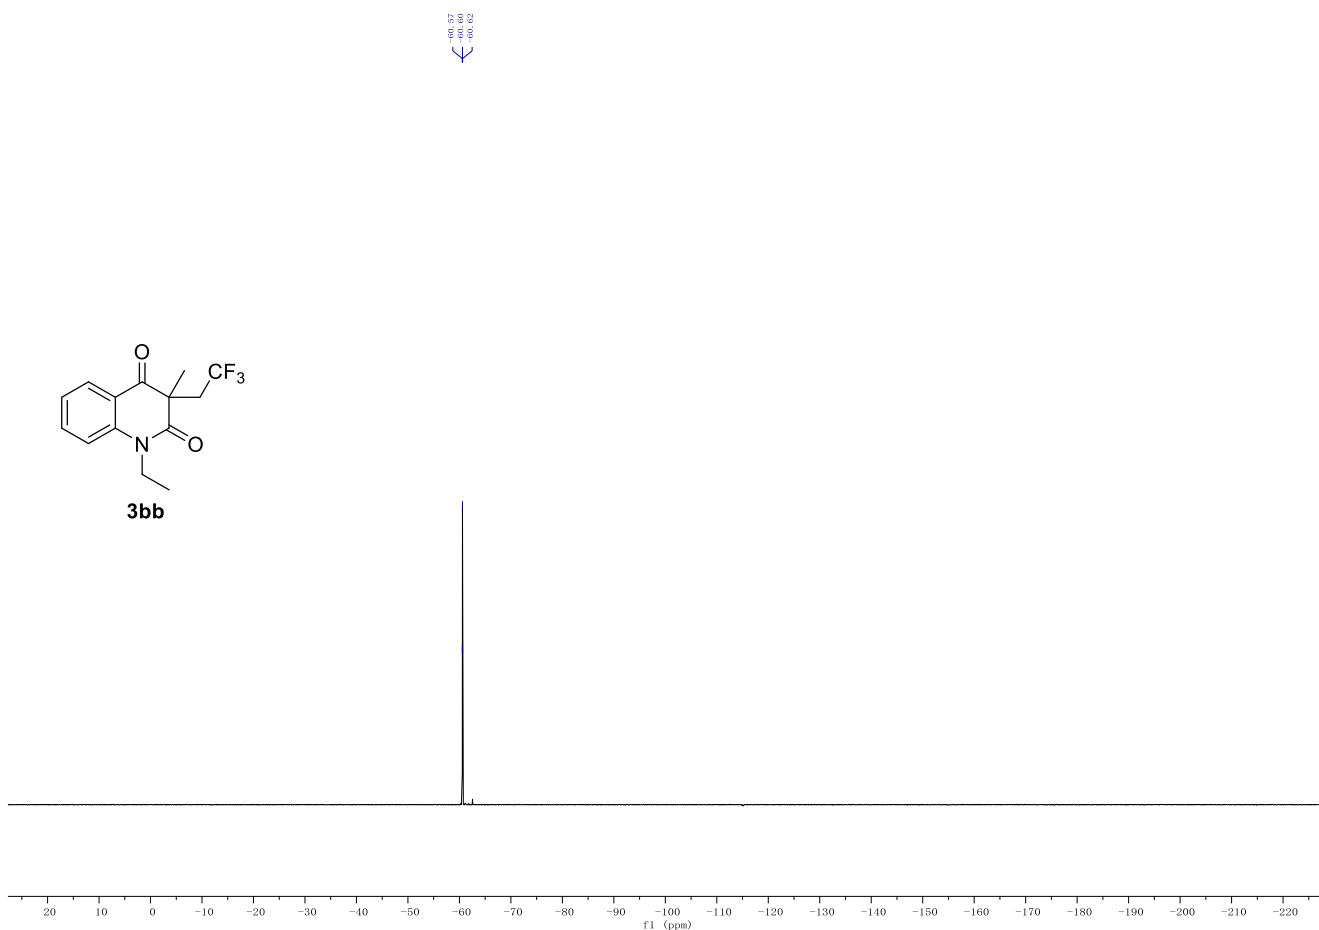

**<sup>19</sup>F NMR Spectrum of Compound 3bb**

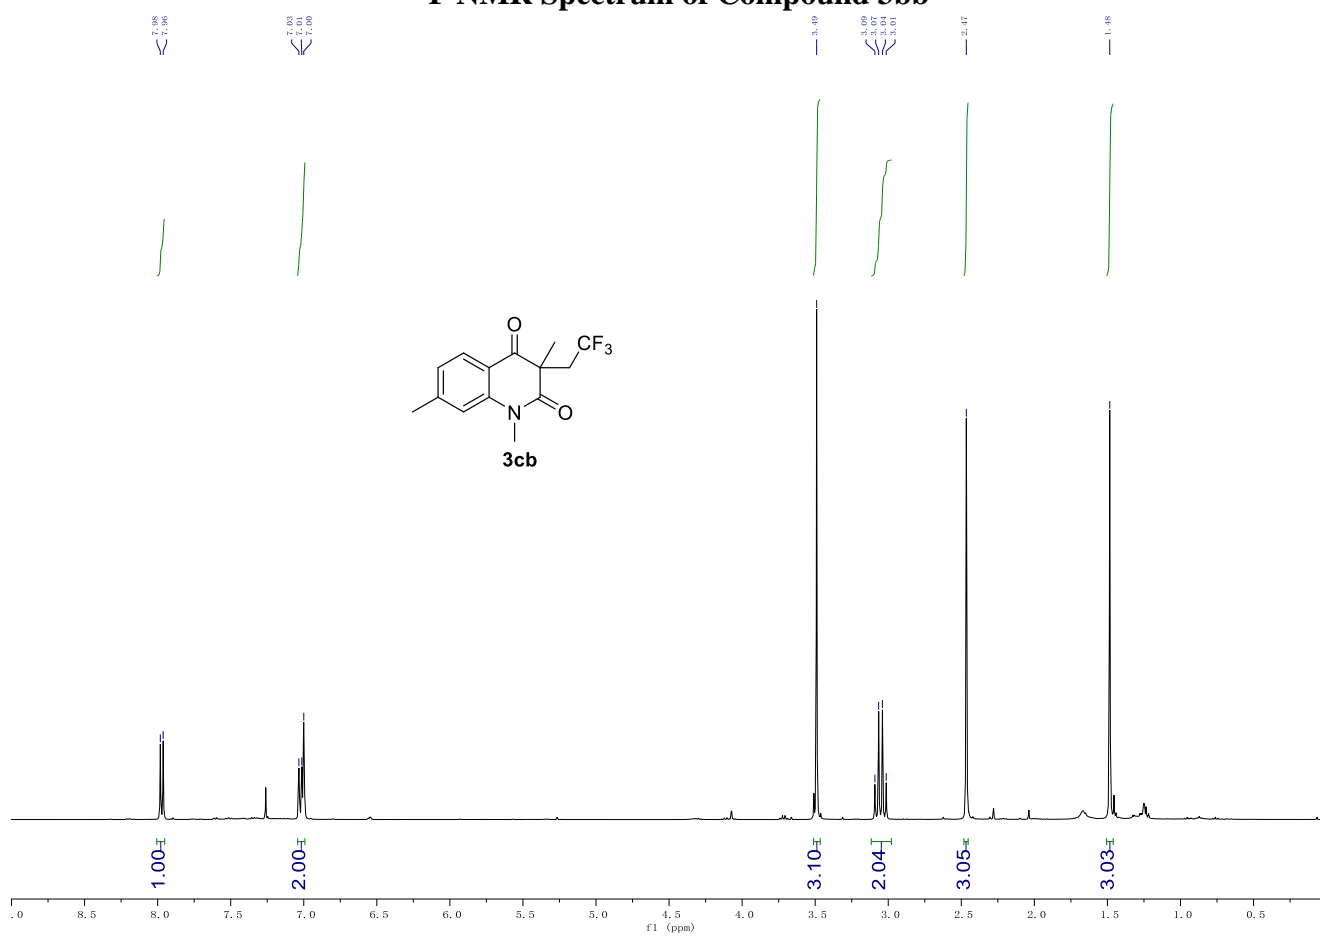

**<sup>1</sup>H NMR Spectrum of Compound 3cb**

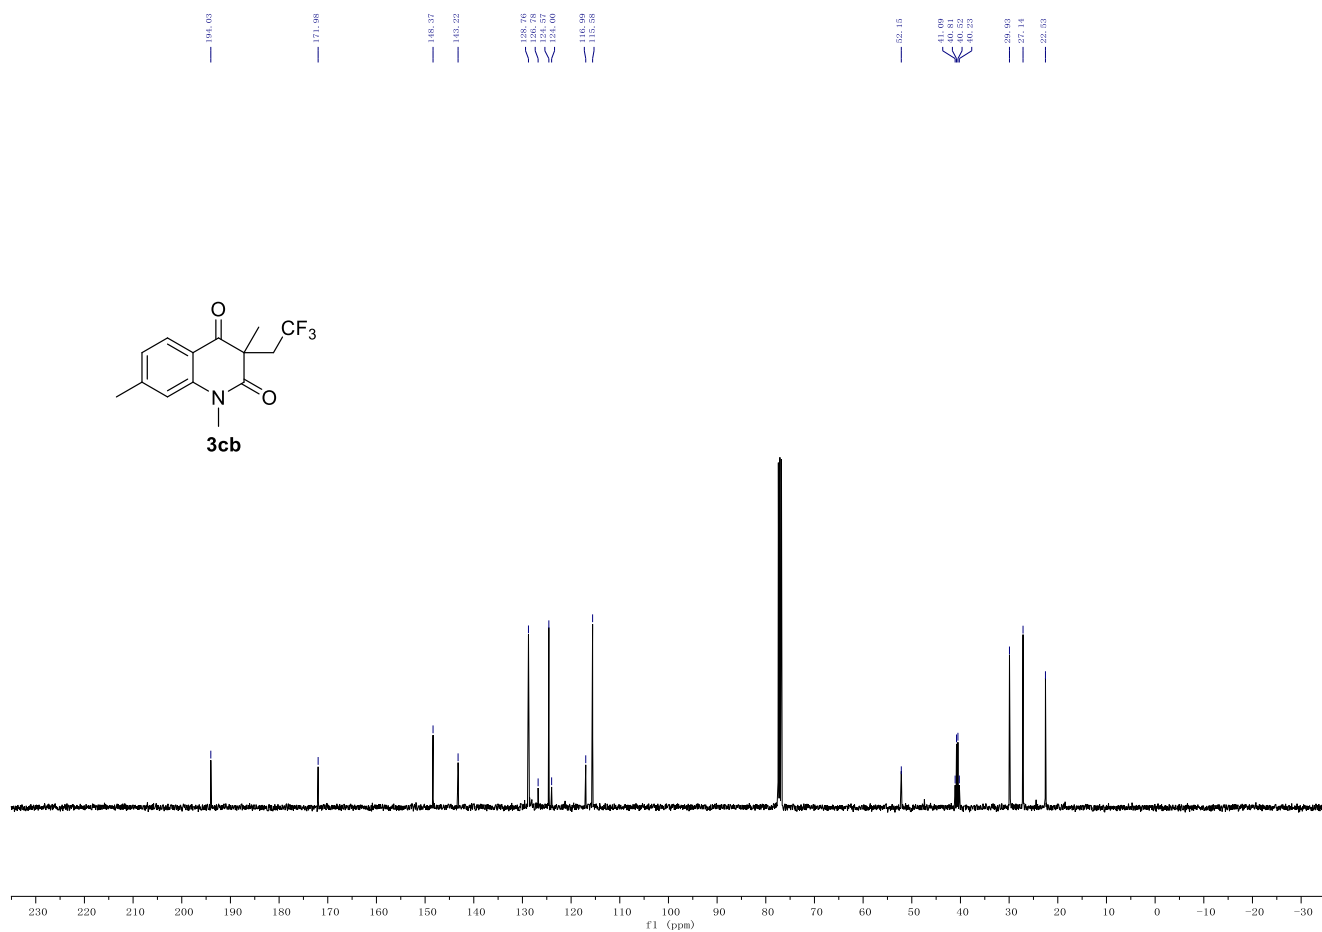

**<sup>13</sup>C NMR Spectrum of Compound 3cb**

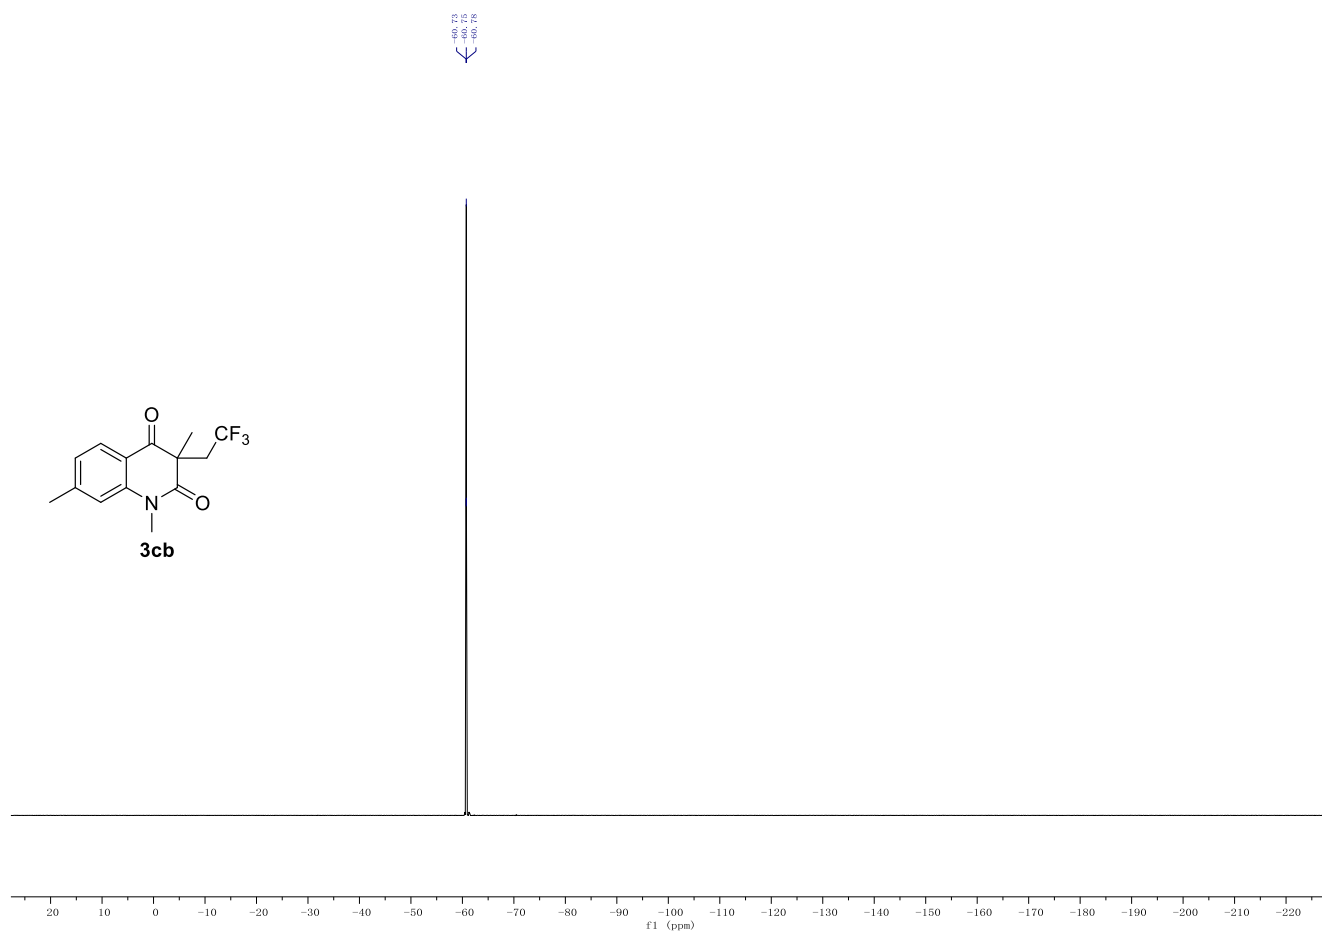

**<sup>19</sup>F NMR Spectrum of Compound 3cb**



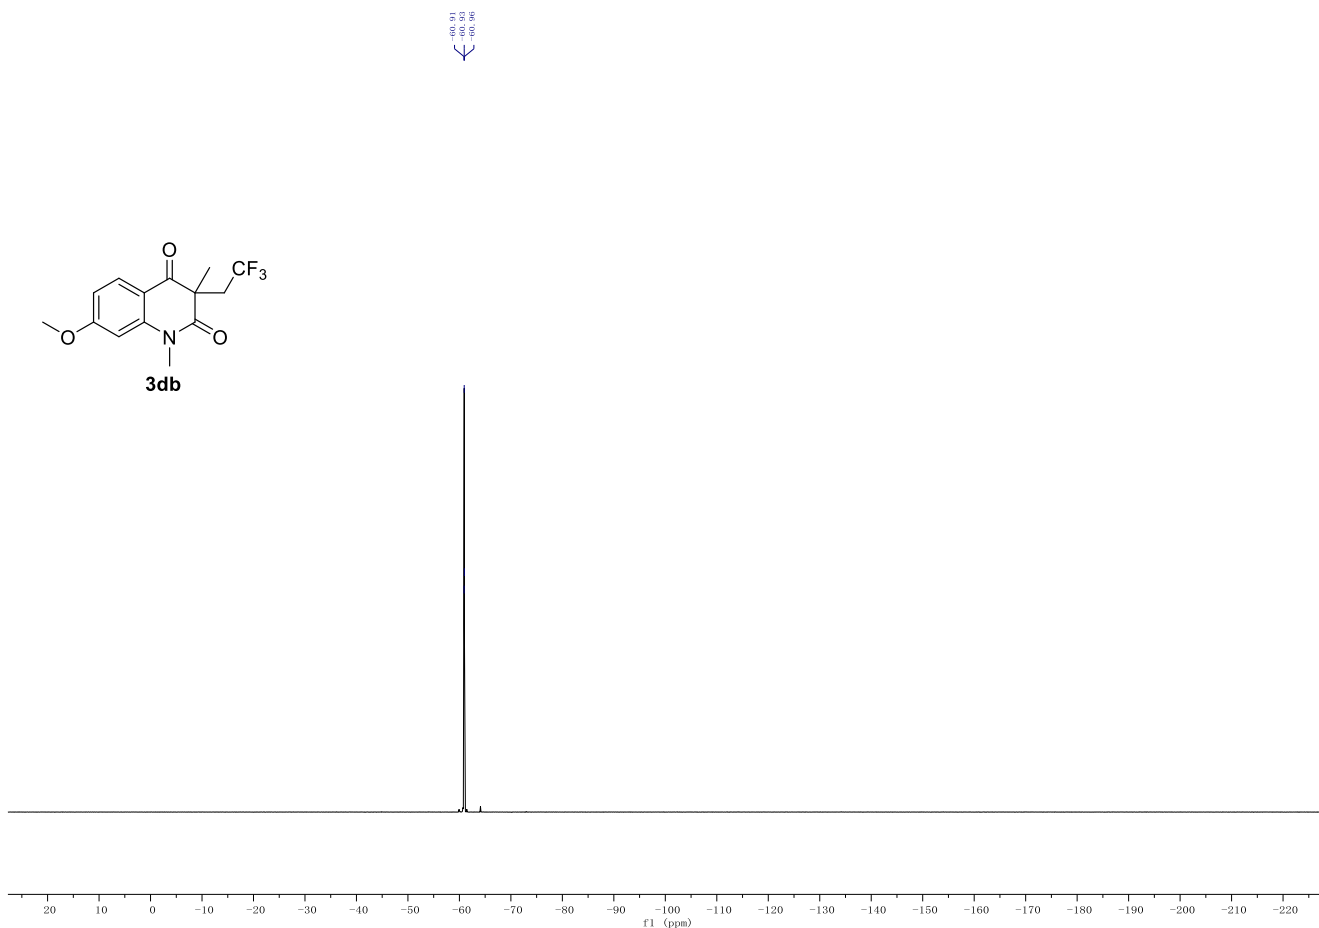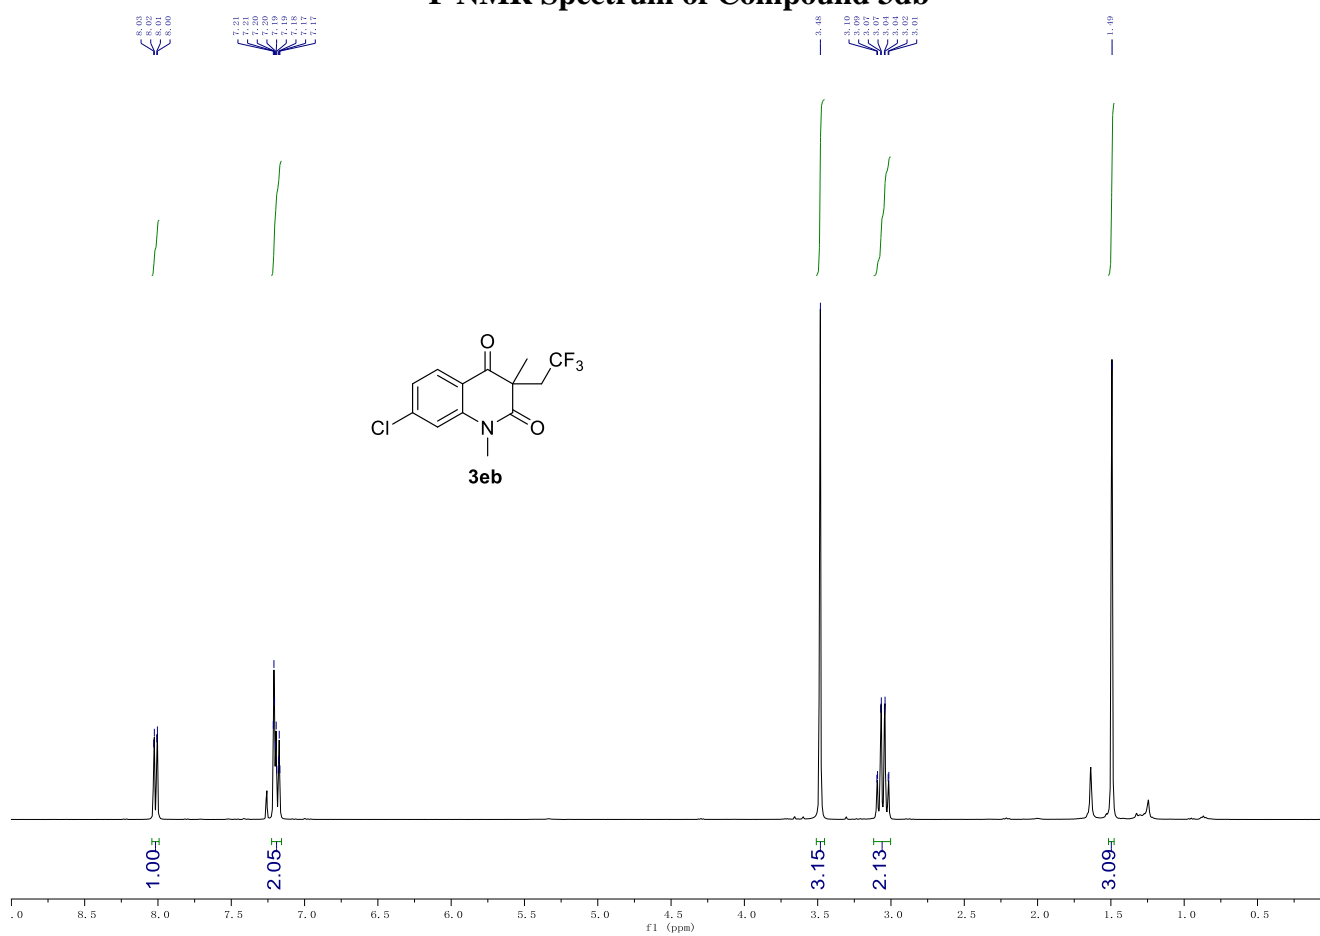

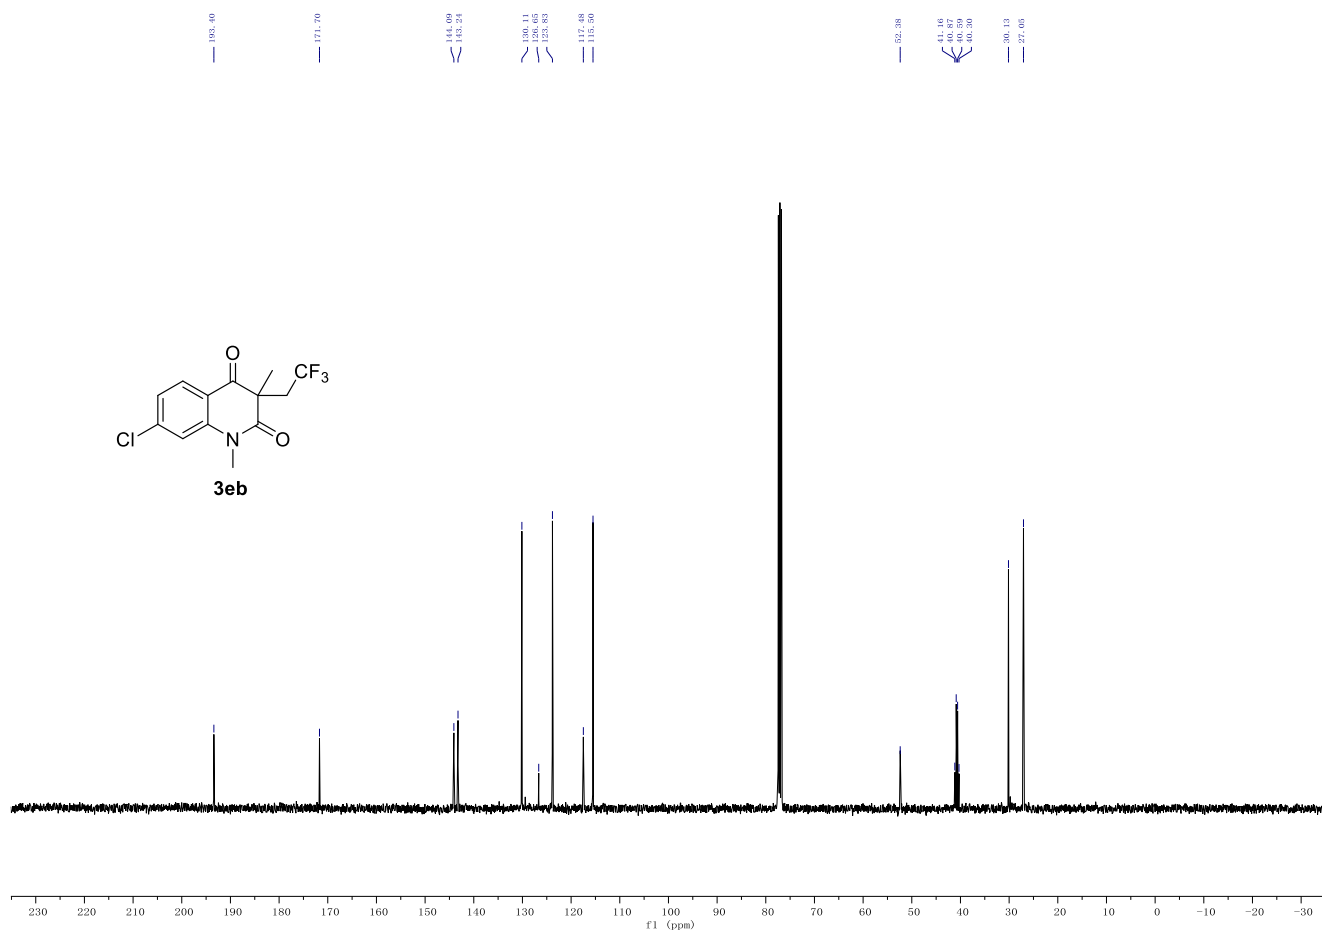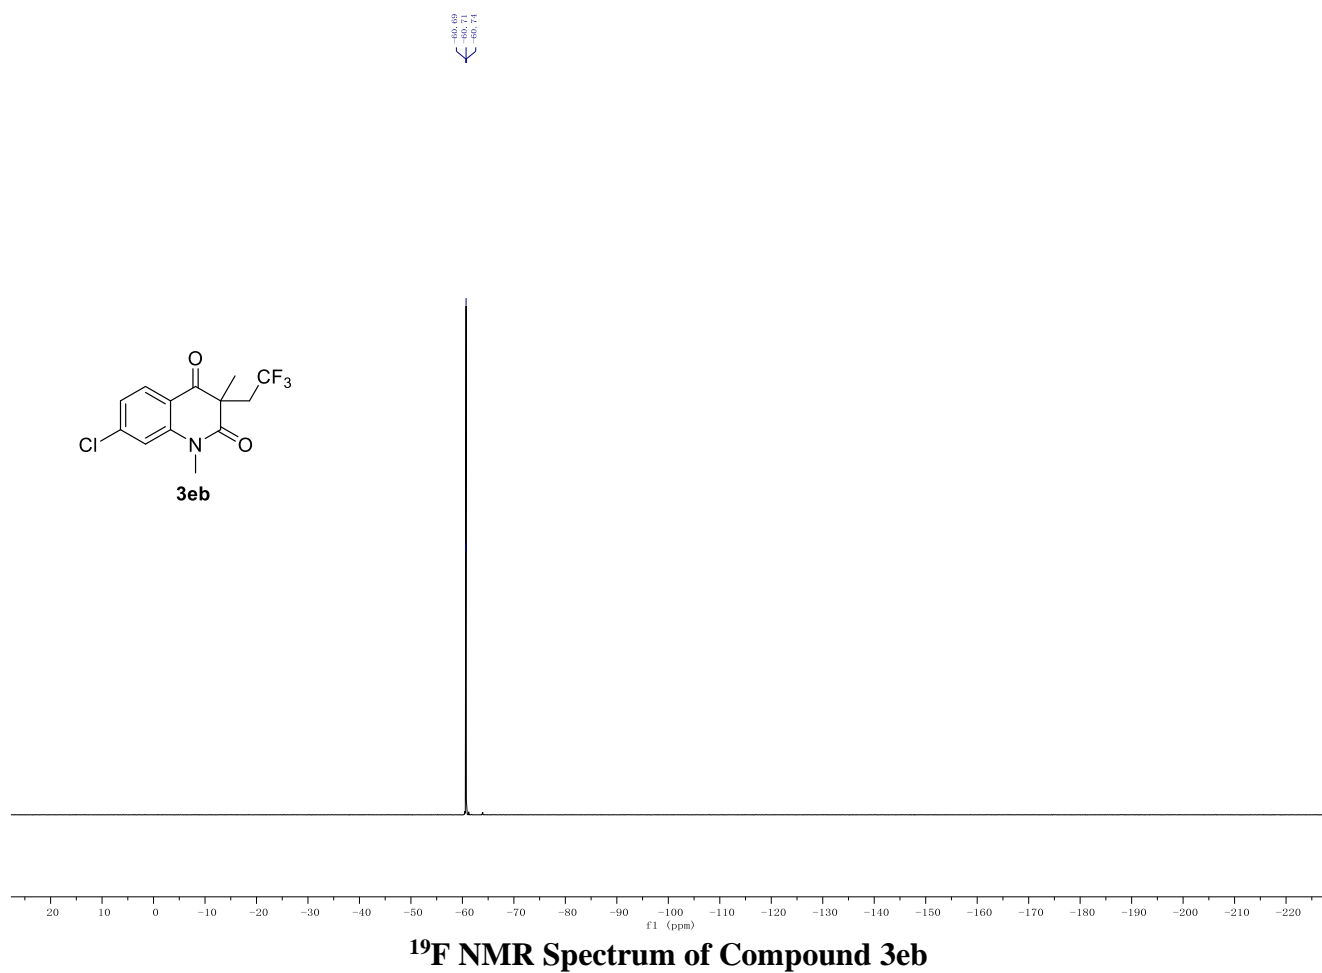

Supplement: d4qo00707g1.pdf [file d4qo00707g1.pdf]
